# Supplementary material for: Multiple Processes May Involve in the IgG4-RD Pathogenesis: An Integrative Study via Proteomic and Transcriptomic Analysis
Source: Front Immunol. 2020 Aug 20;11:1795. doi: 10.3389/fimmu.2020.01795 (PMC7468437; doi:10.3389/fimmu.2020.01795)
Supplement: Table S2 — Differentially expressed proteins between IgG4-RD patients and controls in serum. [file Table_2.XLSX]

## Sheet: Table S2
UniProt	Symbol	Mean_Ratio_IgG4.RD.VS.HC	Ratio_IgG4.RD.VS.HC	SD_IgG4.RD.VS.HC	pVal	Expr	Gene Symbol
P01861	IGHG4	2.48	3.776|3.168|2.917|3.551|3.723|3.032|3.726|3.771|1.222|1.260|1.279|1.540|1.615|1.315|1.616|1.636|5.564|4.005|4.283|5.073|5.318|4.331|5.322|5.387|1.726|1.353|1.522|1.945|2.003|1.545|2.039|2.064|2.435|1.908|2.147|2.520|2.750|2.241|2.875|2.910|3.501|2.744|3.087|3.946|4.241|3.325|4.134|4.185|0.847|0.664|0.747|0.953|0.999|0.814|2.265|2.730|0.837|0.656|0.738|0.942|0.987|0.804|1.026|1.043	1.397	1.081e-13	red	IGHG4
Q4G0X9	CCD40	2.13	1.171|3.337|2.519|0.513|0.425|0.370|0.547|0.595|1.699|4.569|3.565|0.792|0.656|0.571|0.844|0.918|1.037|2.776|2.186|0.466|0.386|0.336|0.497|0.540|3.106|8.163|6.406|1.345|1.104|0.977|1.459|1.587|3.309|8.696|6.824|1.395|1.178|1.044|1.554|1.691|2.871|7.547|5.922|1.263|1.061|0.907|1.349|1.467|2.128|5.594|4.390|0.938|0.777|0.676|1.358|1.553|1.957|5.143|4.036|0.862|0.714|0.621|1.097|1.193	2.075	0.000863	red	CCDC40
P01742	HV169	2.04	1.731|5.154|2.469|1.710|1.966|1.683|2.669|1.033|2.638|7.098|3.773|2.842|3.267|2.796|4.436|1.716|0.438|1.243|0.617|0.444|0.511|0.437|0.693|0.268|0.784|2.018|1.081|0.763|0.873|0.562|1.219|0.472|2.129|5.481|2.935|2.014|2.380|2.217|3.311|1.281|2.625|6.758|3.619|3.365|3.064|1.892|4.082|1.579|0.643|1.656|0.887|0.641|0.737|0.630|1.477|0.601|1.663|4.280|2.292|1.656|1.904|1.629|1.271|0.496	1.516	2.374e-05	red	IGHV1-69
O95810	CAVN2	1.85	4.022|3.396|3.087|4.192|1.439|3.205|1.655|0.887|1.461|1.610|1.488|1.919|0.658|1.467|0.758|0.406|2.722|2.106|2.833|2.975|1.021|2.275|1.175|0.629|1.115|0.799|0.960|1.063|0.439|0.948|0.473|0.254|3.455|2.474|2.975|3.347|1.251|2.670|1.467|0.786|1.949|1.396|1.679|1.959|0.778|1.635|0.828|0.443|2.356|1.687|2.028|2.533|0.869|1.936|1.028|0.541|4.396|3.149|3.786|4.727|1.622|3.614|0.908|0.445	1.141	1.916e-05	red	CAVIN2
P02741	CRP	1.8	0.883|1.225|0.234|1.456|1.588|0.652|0.909|0.961|3.709|5.151|1.524|9.009|9.826|4.036|5.627|5.948|0.909|1.249|0.298|1.703|1.858|0.763|1.064|1.124|1.119|1.275|0.320|1.903|2.158|0.884|1.236|1.307|0.546|0.623|0.156|0.936|1.032|0.425|0.603|0.638|2.152|2.452|0.615|3.716|4.304|1.656|2.377|2.512|0.905|1.032|0.259|1.601|1.746|0.717|1.273|1.278|0.856|0.976|0.245|1.515|1.652|0.678|1.701|1.891	1.869	0.04458	red	CRP
P37802	TAGL2	1.71	5.569|3.053|3.353|2.713|1.868|1.959|1.842|0.793|1.301|1.118|1.065|0.781|0.538|0.564|0.530|0.228|1.874|1.196|1.144|0.939|0.647|0.678|0.638|0.275|2.008|1.197|1.513|1.132|0.811|0.888|0.828|0.356|3.267|1.949|2.462|1.822|1.290|1.464|1.347|0.580|4.147|2.473|3.125|2.559|1.768|1.832|1.710|0.736|2.425|1.446|1.828|1.472|1.014|1.063|0.914|0.418|5.632|3.359|4.244|3.420|2.355|2.469|0.909|0.394	1.198	0.001561	red	TAGLN2
Q15404	RSU1	1.65	2.672|1.995|2.513|2.711|1.256|1.309|1.362|0.444|1.475|1.189|1.562|1.736|0.804|0.838|0.872|0.284|2.271|1.554|2.156|2.324|1.076|1.122|1.167|0.380|1.230|0.829|1.197|1.328|0.594|0.751|0.650|0.212|2.576|1.736|2.507|2.578|1.178|1.519|1.361|0.444|1.927|1.299|1.876|1.923|0.946|1.513|1.018|0.332|1.893|1.276|1.843|1.991|0.922|0.961|1.409|0.451|5.808|3.915|5.653|6.108|2.829|2.948|0.953|0.339	1.211	0.002931	red	RSU1
P49368	TCPG	1.63	2.311|2.196|2.215|1.764|1.314|1.716|1.579|0.751|1.653|1.673|1.983|1.590|1.184|1.547|1.424|0.677|3.731|2.782|3.696|2.816|2.098|2.739|2.521|1.199|0.896|0.749|0.939|0.727|0.529|0.706|0.642|0.305|2.251|1.883|2.360|1.759|1.323|1.771|1.614|0.767|1.946|1.627|2.040|1.575|1.171|1.533|1.395|0.663|1.395|1.167|1.462|1.117|0.832|1.087|1.254|0.620|2.934|2.453|3.075|2.349|1.750|2.285|1.429|0.711	0.765	3.288e-07	red	CCT3
P08519	APOA	1.61	0.325|0.634|0.853|0.906|0.771|0.622|1.051|1.107|0.569|0.941|1.248|1.244|1.059|0.854|1.443|1.520|1.570|2.671|3.739|3.321|2.828|2.280|3.851|4.058|2.086|3.387|4.210|5.114|4.090|3.344|5.337|5.624|0.415|0.674|0.837|0.842|0.662|0.554|1.061|1.118|0.678|1.101|1.368|1.720|1.422|1.109|1.734|1.827|0.391|0.635|0.789|0.862|0.734|0.592|0.929|0.956|0.371|0.602|0.749|0.818|0.697|0.562|1.606|1.867	1.331	0.0295	red	LPA
Q86UX7	URP2	1.58	2.990|2.352|2.693|3.083|1.200|2.515|1.834|0.555|1.133|0.986|1.151|1.326|0.516|1.082|0.789|0.239|1.893|1.426|1.740|2.087|0.812|1.703|1.241|0.376|0.969|0.726|0.907|1.177|0.425|0.855|0.649|0.197|2.093|1.568|1.959|2.326|0.886|1.931|1.402|0.424|1.622|1.216|1.518|2.126|0.687|1.484|1.087|0.329|1.492|1.118|1.397|1.681|0.654|1.372|1.417|0.497|4.932|3.695|4.616|5.557|2.162|4.533|1.112|0.394	1.138	0.01707	red	FERMT3
P04278	SHBG	1.57	2.915|1.605|2.235|2.244|0.808|2.183|1.487|1.178|1.811|1.162|1.634|1.770|0.637|1.722|1.172|0.929|2.498|1.266|1.830|1.879|0.677|1.828|1.244|0.986|3.307|1.752|2.552|2.645|0.842|2.560|1.792|1.420|0.921|0.488|0.711|0.767|0.249|0.719|0.499|0.396|3.635|1.926|2.806|3.194|1.079|2.970|1.970|1.561|1.845|0.978|1.424|1.510|0.544|1.469|1.225|1.114|2.329|1.234|1.797|1.905|0.686|1.853|1.128|0.962	0.774	2.713e-05	red	SHBG
P08254	MMP3	1.51	0.883|0.966|1.084|1.048|0.892|0.879|0.997|1.658|1.269|1.355|1.718|1.464|1.247|1.229|1.394|2.317|2.501|2.475|3.039|2.731|2.325|2.291|2.599|4.321|0.952|0.979|1.044|1.032|0.871|0.874|0.991|1.647|2.994|3.078|3.283|2.934|2.728|2.740|3.115|5.177|0.814|0.836|0.892|0.832|0.762|0.746|0.846|1.407|0.961|0.988|1.054|1.051|0.894|0.881|0.804|1.238|0.578|0.595|0.634|0.632|0.538|0.530|0.560|0.740	0.996	0.001253	red	MMP3
P60660	MYL6	1.51	1.597|1.483|1.746|2.124|1.041|1.771|1.210|0.559|1.169|1.091|1.304|1.662|0.814|1.386|0.947|0.438|2.120|1.817|2.270|2.855|1.398|2.380|1.626|0.751|0.705|0.565|0.769|1.003|0.488|0.792|0.544|0.251|2.345|1.880|2.558|3.026|1.626|2.643|1.810|0.836|1.634|1.310|1.782|1.875|0.993|1.555|1.261|0.583|1.296|1.039|1.413|1.756|0.860|1.464|1.606|0.707|2.804|2.249|3.058|3.800|1.861|3.168|0.922|0.498	0.774	0.000248	red	MYL6
P50990	TCPQ	1.51	2.302|2.038|2.234|2.776|1.098|2.582|1.885|0.915|1.721|1.553|1.770|2.336|0.924|2.174|1.587|0.770|1.796|1.496|1.730|2.199|0.870|2.046|1.494|0.725|1.017|0.852|0.980|1.292|0.487|1.189|0.848|0.412|2.039|1.708|1.965|2.456|0.972|2.384|1.701|0.826|1.464|1.226|1.411|1.843|0.710|1.712|1.221|0.593|1.199|1.004|1.155|1.472|0.583|1.370|1.165|0.579|2.469|2.069|2.380|3.034|1.200|2.822|1.221|0.604	0.653	2.554e-06	red	CCT8
P09493	TPM1	1.49	2.320|1.583|1.357|2.511|0.950|2.184|1.269|0.516|1.401|0.984|0.846|1.654|0.626|1.439|0.836|0.340|2.319|1.505|1.333|2.555|0.966|2.222|1.292|0.525|1.054|0.696|0.604|1.169|0.429|1.015|0.587|0.238|2.557|1.688|1.465|2.715|1.040|2.467|1.423|0.578|1.783|1.177|1.022|1.991|0.748|1.722|0.992|0.403|1.797|1.187|1.029|1.978|0.748|1.721|1.166|0.475|4.422|2.919|2.533|4.867|1.841|4.233|0.991|0.391	0.958	0.01266	red	TPM1
P01594	KV133	1.49	2.228|1.325|1.930|0.488|0.812|0.953|1.228|1.209|2.128|1.843|2.167|0.624|1.039|1.219|1.571|1.546|1.901|1.520|1.766|0.519|0.864|1.015|1.308|1.287|2.122|1.439|2.033|0.510|0.939|1.089|1.307|1.286|2.119|1.437|2.030|0.492|0.910|0.901|1.305|1.284|4.881|3.309|4.677|1.190|2.239|2.335|3.006|2.958|1.624|1.101|1.556|0.397|0.661|0.776|1.093|1.094|1.650|1.119|1.581|0.404|0.672|0.788|1.264|1.274	0.868	0.0003176	red	IGKV1-33
Q93079	H2B1H	1.47	0.748|0.526|0.983|0.815|1.005|0.664|0.495|0.775|1.432|1.087|2.066|1.723|2.124|1.403|1.046|1.638|1.978|1.311|2.654|2.105|2.594|1.713|1.277|2.001|1.201|0.837|1.648|1.337|1.627|1.078|0.795|1.246|1.875|1.307|2.574|2.001|2.536|1.682|1.242|1.946|1.615|1.126|2.217|1.792|2.231|1.450|1.069|1.675|1.510|1.053|2.073|1.648|2.031|1.341|0.673|0.921|0.964|0.672|1.323|1.052|1.296|0.856|1.537|2.562	0.56	1.394e-07	red	HIST1H2BH
O43681	ASNA	1.46	1.034|1.499|2.122|2.291|1.092|2.132|1.028|0.815|0.986|1.315|2.002|2.184|1.041|2.033|0.980|0.777|0.983|1.317|2.081|2.157|1.028|2.007|0.968|0.767|0.926|1.240|1.993|2.132|0.974|1.966|0.929|0.736|1.196|1.601|2.572|2.608|1.253|2.537|1.199|0.950|0.762|1.020|1.639|1.739|0.812|1.618|0.764|0.606|0.998|1.335|2.145|2.229|1.063|2.074|0.851|0.609|1.258|1.684|2.707|2.812|1.341|2.617|0.805|0.531	0.631	2.436e-06	red	ASNA1
O00299	CLIC1	1.45	1.587|1.851|1.754|2.509|1.063|2.362|1.915|0.505|0.965|1.081|1.071|1.546|0.655|1.455|1.180|0.311|1.315|1.423|1.458|2.094|0.887|1.971|1.598|0.422|0.606|0.645|0.680|1.008|0.408|0.940|0.746|0.197|1.681|1.788|1.886|2.644|1.167|2.596|2.069|0.546|0.986|1.050|1.107|1.801|0.747|1.700|1.214|0.320|0.812|0.865|0.912|1.310|0.555|1.233|1.699|0.660|3.080|3.278|3.457|4.968|2.104|4.676|1.502|0.459	0.954	0.03601	red	CLIC1
P08567	PLEK	1.44	1.835|2.215|1.804|1.881|1.031|1.526|1.552|0.483|0.998|1.084|0.917|1.147|0.629|0.931|0.947|0.295|2.276|2.449|2.209|1.538|0.843|1.248|1.269|0.395|0.935|1.014|0.917|1.057|0.640|0.827|0.808|0.251|1.979|2.146|1.942|2.080|1.073|1.714|1.711|0.532|1.560|1.692|1.531|1.679|0.920|1.367|1.348|0.420|1.157|1.254|1.135|1.212|0.664|0.983|1.352|0.490|3.719|4.032|3.649|3.894|2.134|3.160|1.030|0.380	0.858	0.01479	red	PLEK
P0DJI8	SAA1	1.44	1.067|0.988|0.731|0.413|0.739|0.420|0.611|0.528|1.079|0.994|0.745|0.439|0.785|0.446|0.649|0.561|2.189|1.920|1.486|0.860|1.539|0.875|1.271|1.099|2.300|2.001|1.545|0.940|1.422|0.913|1.330|1.150|4.630|4.027|3.110|1.680|3.039|1.766|2.677|2.314|3.049|2.652|2.048|0.989|1.518|1.221|1.762|1.524|1.730|1.504|1.162|0.676|1.210|0.688|1.132|1.221|2.001|1.740|1.344|0.782|1.400|0.796|1.447|1.449	0.846	0.002657	red	SAA1
P18206	VINC	1.43	1.521|1.491|1.429|1.810|1.097|1.493|1.227|0.737|1.154|1.144|1.179|1.487|0.901|1.227|1.008|0.606|2.146|1.846|1.999|2.803|1.698|2.313|1.900|1.142|1.094|1.098|1.177|1.332|0.844|1.199|0.994|0.598|1.869|1.875|2.009|2.321|1.414|1.948|1.698|1.020|1.443|1.448|1.551|2.009|1.181|1.631|1.311|0.788|1.101|1.104|1.183|1.475|0.894|1.217|1.316|0.912|1.831|1.838|1.969|2.455|1.487|2.025|1.034|0.683	0.477	1.384e-09	red	VCL
Q9H853	TBA4B	1.42	2.485|1.937|2.833|2.046|1.455|1.556|1.851|0.932|1.216|0.993|1.471|1.086|0.772|0.826|0.983|0.494|1.606|1.195|1.851|1.332|0.947|1.013|1.205|0.606|1.423|1.070|1.671|1.195|0.838|0.913|1.091|0.549|2.168|1.632|2.547|1.765|1.278|1.394|1.663|0.837|2.126|1.600|2.498|1.812|1.299|1.369|1.630|0.820|1.304|0.982|1.532|1.105|0.786|0.841|1.392|0.719|2.592|1.950|3.045|2.196|1.562|1.671|0.976|0.437	0.589	5.845e-06	red	TUBA4B
P19022	CADH2	1.41	2.763|2.703|2.500|3.024|3.143|3.608|3.975|4.443|1.010|1.155|1.119|1.279|1.330|1.527|1.682|1.880|1.005|1.400|1.285|1.484|1.542|1.770|1.950|2.180|0.967|1.073|1.087|1.103|1.129|1.180|1.661|1.856|0.796|0.882|0.894|1.025|1.061|1.010|1.366|1.527|0.906|1.004|1.018|1.186|1.242|1.277|1.555|1.738|0.582|0.646|0.655|0.761|0.791|0.908|1.058|1.186|0.521|0.578|0.586|0.681|0.707|0.812|0.862|0.920	0.826	0.0006355	red	CDH2
P62805	H4	1.41	0.755|0.590|0.761|1.084|1.069|0.753|1.049|1.278|1.454|1.145|1.488|2.239|2.207|1.555|2.167|2.638|1.522|1.149|1.513|2.203|2.172|1.530|2.132|2.596|0.902|0.707|0.890|1.324|1.283|0.910|1.257|1.530|1.950|1.530|1.924|2.736|2.785|1.975|2.719|3.310|1.298|1.018|1.281|1.905|1.883|1.309|1.809|2.203|0.717|0.563|0.708|1.033|1.019|0.717|0.786|0.883|0.589|0.462|0.581|0.849|0.837|0.589|1.031|1.235	0.674	0.0003141	red	H4C1
P35579	MYH9	1.41	1.115|1.268|1.428|1.244|0.952|1.066|0.949|0.458|1.103|1.143|1.304|1.175|0.899|1.006|0.896|0.433|1.700|1.663|1.822|1.899|1.453|1.627|1.449|0.699|0.955|0.981|1.049|0.995|0.858|0.838|0.830|0.401|2.423|2.490|2.662|2.486|2.188|2.197|2.106|1.017|1.558|1.601|1.711|1.737|1.405|1.462|1.354|0.654|1.150|1.182|1.264|1.310|1.003|1.123|1.390|0.780|2.383|2.449|2.618|2.715|2.078|2.326|1.023|0.522	0.605	5.455e-05	red	MYH9
P02655	APOC2	1.4	1.777|1.483|2.428|1.886|1.873|1.972|2.012|2.086|1.065|0.852|1.420|1.191|1.182|1.245|1.270|1.317|0.962|0.806|1.312|1.088|1.080|1.138|1.161|1.203|2.382|1.901|3.167|2.603|2.385|2.558|2.739|2.839|0.951|0.759|1.265|1.054|0.982|1.054|1.094|1.134|1.043|0.833|1.387|1.112|1.099|1.154|1.200|1.243|0.869|0.694|1.156|0.937|0.931|0.980|1.947|2.241|0.839|0.670|1.116|0.904|0.898|0.946|1.317|1.452	0.595	7.645e-07	red	PRDX6
P30041	PRDX6	1.4	2.292|1.785|1.765|2.879|1.627|2.269|1.361|0.876|1.565|1.395|1.442|2.573|1.454|2.028|1.216|0.783|1.287|1.139|1.153|1.910|1.080|1.506|0.903|0.581|1.043|1.072|0.944|1.843|1.021|1.454|0.873|0.562|1.051|1.081|0.952|1.799|1.031|1.472|0.881|0.567|1.092|1.123|0.989|1.955|1.108|1.529|0.915|0.589|1.194|1.228|1.081|2.115|1.196|1.667|1.097|0.709|1.855|1.907|1.679|3.286|1.857|2.590|1.352|0.894	0.57	2.137e-06	red	APOC2
A0A0C4DH31	HV118	1.39	1.082|1.048|1.082|0.826|1.150|0.972|1.265|0.737|1.929|1.901|2.043|1.658|2.309|1.951|2.540|1.479|1.222|1.156|1.211|0.870|1.211|1.023|1.332|0.776|1.171|1.100|1.220|0.892|1.237|1.104|1.384|0.806|1.454|1.366|1.515|1.213|1.539|1.321|1.719|1.001|2.499|2.348|2.604|1.786|2.746|2.269|2.953|1.720|0.846|0.795|0.882|0.653|0.909|0.768|1.488|0.909|1.453|1.365|1.514|1.121|1.561|1.319|1.150|0.683	0.548	3.392e-07	red	IGHV1-18
Q13642	FHL1	1.38	2.381|2.276|2.321|2.239|1.406|2.010|1.174|0.671|0.940|0.894|0.929|0.895|0.562|0.803|0.469|0.268|1.327|1.192|1.292|1.257|0.789|1.128|0.659|0.376|1.246|1.092|1.240|1.232|0.749|1.099|0.632|0.361|1.875|1.643|1.866|1.779|1.117|1.644|0.951|0.543|1.458|1.278|1.451|1.425|0.886|1.285|0.740|0.422|1.971|1.728|1.962|1.907|1.197|1.712|0.970|0.555|3.452|3.026|3.436|3.340|2.097|2.998|1.086|0.529	0.766	0.02379	red	FHL1
P60709	ACTB	1.38	1.722|1.561|1.704|1.646|0.945|1.349|1.261|0.541|1.068|0.956|1.101|1.046|0.601|0.857|0.801|0.344|1.929|1.610|1.887|1.857|1.066|1.522|1.422|0.611|0.965|0.827|0.975|0.973|0.515|0.840|0.728|0.313|2.368|2.030|2.391|2.221|1.317|1.941|1.787|0.767|1.878|1.610|1.897|1.742|1.038|1.549|1.418|0.609|1.325|1.136|1.338|1.305|0.749|1.070|1.228|0.567|3.086|2.645|3.116|3.040|1.745|2.492|1.129|0.476	0.669	0.002802	red	CAP1
Q01518	CAP1	1.38	2.466|1.806|1.710|2.714|1.256|1.935|2.025|0.779|1.293|1.156|1.195|1.886|0.873|1.344|1.407|0.541|2.080|1.476|1.607|2.260|1.046|1.611|1.686|0.649|0.785|0.575|0.676|1.100|0.459|0.734|0.725|0.279|1.671|1.224|1.441|2.217|0.990|1.580|1.543|0.594|1.656|1.213|1.428|2.149|0.940|1.527|1.530|0.588|1.083|0.793|0.933|1.340|0.620|0.955|1.085|0.430|2.815|2.062|2.427|3.485|1.613|2.484|1.221|0.610	0.664	0.003105	red	ACTB
Q96KK5	H2A1H	1.38	0.692|0.805|1.000|1.350|1.601|1.005|0.653|1.111|0.859|0.933|1.481|1.088|1.291|0.810|0.527|0.896|0.900|1.047|1.679|1.385|1.643|1.031|0.670|1.140|0.751|1.088|1.877|1.501|1.760|1.102|0.714|1.214|1.360|1.971|3.399|2.585|3.186|1.995|1.292|2.198|0.820|1.188|2.049|1.636|1.956|1.201|0.779|1.325|1.052|1.525|2.630|2.066|2.451|1.538|0.829|1.255|0.619|0.897|1.546|1.215|1.441|0.904|1.278|2.262	0.611	3.416e-05	red	ITGA2B
P08514	ITA2B	1.38	1.239|1.537|1.507|1.443|1.273|1.437|1.172|0.573|0.944|0.897|1.075|0.929|0.819|0.925|0.755|0.369|1.952|1.815|2.342|2.250|1.985|2.241|1.828|0.893|0.900|0.802|1.112|0.994|0.847|0.885|0.712|0.348|1.740|1.551|2.150|1.954|1.612|1.683|1.377|0.673|1.527|1.361|1.887|1.333|1.285|1.173|1.209|0.590|1.263|1.126|1.561|1.231|1.086|1.226|1.278|0.810|2.587|2.306|3.196|2.520|2.223|2.510|1.064|0.618	0.602	0.0002177	red	HIST1H2AH
Q00796	DHSO	1.37	1.352|2.528|1.977|2.727|2.360|2.228|3.617|3.986|0.721|1.167|0.982|1.323|1.145|1.081|1.755|1.934|0.894|1.498|1.308|1.789|1.549|1.462|2.373|2.615|0.736|1.274|1.101|1.531|1.295|1.240|1.991|2.194|0.575|0.995|0.861|1.173|1.005|0.965|1.556|1.715|0.802|1.389|1.200|1.659|1.435|1.350|2.170|2.392|0.370|0.640|0.553|0.754|0.653|0.616|0.837|0.876|0.335|0.581|0.502|0.684|0.592|0.559|1.088|1.199	0.747	0.01021	red	DHSO
Q9H4B7	TBB1	1.37	1.863|2.263|2.065|2.275|0.963|1.850|1.500|0.833|0.964|1.121|1.053|1.160|0.491|0.943|0.765|0.425|1.784|1.896|2.361|2.172|0.919|1.766|1.432|0.795|0.980|1.008|1.007|1.106|0.517|0.715|0.724|0.402|1.917|1.971|1.970|1.943|0.931|1.760|1.415|0.785|1.451|1.492|1.491|1.905|0.799|1.108|1.071|0.595|1.354|1.393|1.392|1.517|0.642|1.233|1.151|0.798|2.440|2.509|2.508|2.732|1.156|2.221|1.096|0.584	0.602	0.0008622	red	TUBB1
P25705	ATPA	1.37	0.784|1.268|1.198|1.890|1.171|1.591|1.874|0.703|0.976|1.474|1.459|2.404|1.489|2.023|2.383|0.894|0.967|1.466|1.466|2.342|1.451|1.971|2.322|0.871|0.596|0.940|0.898|1.473|0.883|1.228|1.427|0.535|1.103|1.739|1.662|2.586|1.626|2.267|2.639|0.990|0.726|1.144|1.094|1.783|1.093|1.493|1.737|0.651|0.418|0.659|0.630|1.009|0.625|0.849|1.531|0.604|1.114|1.757|1.680|2.690|1.667|2.264|1.137|0.428	0.594	0.0004372	red	ATP5F1A
P0DJI9	SAA2	1.37	1.662|2.377|0.673|1.285|1.914|1.695|2.093|2.323|1.493|1.999|0.682|1.310|1.952|1.729|2.135|2.369|1.569|1.900|0.626|1.207|1.798|1.592|1.966|2.182|1.494|1.829|0.613|1.153|1.714|1.544|1.920|2.130|1.379|1.688|0.566|1.037|1.576|1.422|1.772|1.966|1.047|1.282|0.430|0.822|1.248|1.087|1.346|1.493|0.778|0.952|0.319|0.614|0.914|0.810|1.437|1.624|0.701|0.858|0.288|0.553|0.824|0.730|1.547|1.789	0.556	0.00117	red	SAA2
O75874	IDHC	1.36	0.884|1.458|2.787|2.157|3.165|2.550|1.245|2.125|0.783|1.032|2.110|1.375|2.018|1.626|0.794|1.355|0.707|1.104|2.742|1.584|2.323|1.872|0.914|1.560|0.500|0.816|2.102|1.246|1.818|1.475|0.703|1.199|0.424|0.690|1.779|1.042|1.530|1.244|0.595|1.015|0.365|0.595|1.533|0.881|1.314|1.076|0.512|0.875|0.712|1.161|2.991|1.732|2.542|2.048|0.657|0.941|0.417|0.680|1.753|1.015|1.489|1.200|0.749|1.114	0.682	0.008485	red	IDH1
P48643	TCPE	1.36	1.252|1.373|1.532|1.616|1.350|1.366|0.839|0.529|1.115|1.195|1.326|1.487|1.243|1.257|0.772|0.487|1.317|1.240|1.490|1.624|1.358|1.373|0.843|0.532|1.414|1.397|1.822|1.752|1.444|1.487|0.914|0.577|1.263|1.248|1.628|1.520|1.290|1.330|0.817|0.515|1.030|1.018|1.329|1.286|1.084|1.088|0.666|0.421|1.546|1.528|1.993|1.927|1.610|1.629|1.168|0.750|2.451|2.422|3.159|3.053|2.552|2.582|1.097|0.695	0.572	0.0001425	red	CCT5
Q14847	LASP1	1.35	1.697|1.885|1.857|2.019|1.172|1.770|1.008|0.669|1.111|1.207|1.258|1.383|0.803|1.212|0.691|0.458|1.542|1.562|1.694|1.841|1.068|1.614|0.919|0.610|0.998|1.002|1.120|1.195|0.685|1.057|0.606|0.402|1.459|1.464|1.638|1.697|1.004|1.552|0.886|0.588|1.278|1.283|1.434|1.558|0.913|1.361|0.776|0.515|1.647|1.652|1.848|2.003|1.162|1.755|0.988|0.612|2.483|2.491|2.786|3.020|1.752|2.647|1.105|0.681	0.579	0.0007046	red	LASP1
P02748	CO9	1.35	1.974|1.865|0.687|1.165|1.518|1.226|1.084|1.033|2.695|2.554|1.042|1.807|2.356|1.902|1.682|1.602|1.607|1.362|0.539|0.938|1.223|0.987|0.873|0.832|1.538|1.305|0.518|0.925|1.161|1.006|0.831|0.791|1.466|1.244|0.494|0.878|1.101|0.931|0.792|0.754|3.105|2.635|1.046|1.745|2.311|1.837|1.677|1.598|1.852|1.571|0.623|1.075|1.401|1.131|0.982|0.887|1.944|1.650|0.654|1.128|1.471|1.187|1.413|1.325	0.565	8.059e-05	red	C9
Q02487	DSC2	1.35	1.722|1.349|1.479|1.578|1.699|1.766|1.664|1.308|1.938|1.610|1.688|1.869|2.013|2.093|1.971|1.550|1.999|1.379|1.590|1.577|1.698|1.765|1.663|1.308|1.070|0.840|0.991|0.893|0.901|0.989|0.922|0.725|1.247|0.979|1.156|1.076|1.062|1.234|1.075|0.845|1.941|1.524|1.799|1.510|1.703|1.820|1.673|1.315|1.160|0.911|1.075|0.948|1.021|1.062|0.840|0.570|1.475|1.159|1.367|1.206|1.298|1.350|0.846|0.542	0.39	1.448e-08	red	DSC2
P05106	ITB3	1.34	1.543|1.355|1.185|1.670|1.055|1.303|0.770|0.700|1.284|1.135|1.008|1.481|0.935|1.156|0.682|0.621|2.033|1.673|1.540|2.225|1.406|1.737|1.026|0.933|1.460|1.233|1.107|1.482|1.132|0.735|0.738|0.671|2.026|1.712|1.537|2.164|1.239|1.587|1.024|0.932|1.534|1.296|1.164|1.709|1.181|1.197|0.776|0.706|1.978|1.672|1.501|2.170|1.371|1.694|0.855|0.750|2.175|1.838|1.650|2.386|1.507|1.862|0.751|0.649	0.46	3.956e-06	red	ITGB3
P04275	VWF	1.34	1.428|1.434|1.622|1.206|1.808|1.440|1.233|1.654|1.369|1.375|1.621|1.257|1.885|1.502|1.286|1.724|1.174|1.178|1.364|1.011|1.515|1.207|1.034|1.386|0.961|0.948|1.105|0.815|1.190|0.953|0.832|1.116|1.458|1.437|1.676|1.209|1.895|1.475|1.262|1.693|1.819|1.793|2.090|1.565|2.430|1.788|1.575|2.112|1.155|1.138|1.328|0.978|1.466|1.168|0.900|1.038|0.861|0.849|0.990|0.729|1.093|0.871|0.975|1.148	0.358	9.994e-11	red	VWF
P35908	K22E	1.32	1.658|1.428|1.563|2.048|2.133|1.722|2.915|2.556|0.868|0.908|0.862|1.115|1.161|0.937|1.586|1.391|0.878|1.091|1.070|1.434|1.494|1.206|2.041|1.790|0.652|0.787|0.793|0.942|1.137|0.911|1.425|1.249|1.506|1.815|1.829|1.751|2.299|1.876|3.288|2.883|0.929|1.120|1.129|1.307|1.655|1.199|2.029|1.779|0.458|0.552|0.556|0.703|0.732|0.591|0.866|0.741|0.522|0.630|0.634|0.802|0.835|0.674|1.614|1.597	0.626	0.004042	red	KRT2
Q08830	FGL1	1.32	1.754|1.564|1.373|1.120|1.639|1.035|1.455|1.265|1.432|1.233|1.124|0.835|1.221|0.771|1.084|0.942|2.283|1.815|1.756|1.453|2.124|1.342|1.886|1.639|1.298|1.021|1.012|0.831|1.211|0.676|1.079|0.938|1.467|1.155|1.144|0.948|1.526|0.865|1.220|1.061|2.541|2.000|1.981|1.634|2.433|1.318|2.113|1.837|1.203|0.947|0.938|0.770|1.127|0.712|1.479|1.590|1.383|1.089|1.078|0.886|1.296|0.819|1.017|0.822	0.436	2.506e-07	red	FGL1
Q4LDE5	SVEP1	1.32	1.129|1.217|1.054|1.066|0.987|0.882|1.053|0.878|1.535|1.566|1.328|1.821|1.686|1.507|1.799|1.500|2.750|2.226|1.970|2.325|2.152|1.923|2.297|1.915|1.341|1.154|1.115|1.172|1.062|0.955|1.127|0.940|1.324|1.140|1.101|1.078|0.984|0.984|1.113|0.928|1.665|1.433|1.384|1.516|1.323|1.287|1.400|1.167|1.189|1.024|0.989|1.012|0.937|0.838|1.076|0.914|1.427|1.228|1.186|1.214|1.124|1.005|0.972|0.799	0.417	1.022e-08	red	SVEP1
Q06033	ITIH3	1.32	1.654|1.692|1.402|1.483|1.635|1.340|1.092|1.212|1.577|1.634|1.485|1.658|1.828|1.498|1.222|1.356|1.485|1.400|1.244|1.374|1.515|1.242|1.013|1.124|1.142|1.091|1.020|1.086|1.316|1.116|0.843|0.935|1.180|1.128|1.055|1.020|1.265|1.036|0.871|0.967|1.870|1.786|1.670|1.613|1.928|1.491|1.380|1.532|1.355|1.294|1.210|1.357|1.497|1.227|1.368|1.434|1.221|1.166|1.090|1.223|1.348|1.105|0.966|0.987	0.257	1.577e-15	red	ITIH3
P08833	IBP1	1.31	1.215|1.104|1.066|0.799|0.722|0.930|1.297|1.072|3.711|3.386|3.590|2.728|2.465|3.175|4.426|3.658|0.885|0.819|0.785|0.610|0.551|0.710|0.989|0.818|1.240|1.164|1.055|0.970|0.997|1.112|1.333|1.102|1.268|1.190|1.078|0.674|0.741|1.064|1.363|1.126|1.563|1.468|1.330|1.033|0.946|1.172|1.681|1.389|0.930|0.873|0.791|0.616|0.557|0.717|1.025|0.852|1.125|1.057|0.957|0.746|0.674|0.868|1.199|1.014	0.854	0.03496	red	IGFBP1
A0A0A0MS15	HV349	1.31	0.742|0.973|1.031|0.613|0.844|0.945|0.858|0.385|0.903|1.121|1.230|0.755|1.040|1.164|1.057|0.475|0.669|0.888|0.931|0.559|0.769|0.861|0.782|0.351|1.906|2.307|2.637|1.419|2.152|2.455|2.214|0.994|1.509|1.828|2.088|1.317|2.052|2.347|1.753|0.788|1.257|1.522|1.739|1.078|1.627|1.360|1.460|0.656|0.861|1.042|1.191|0.715|0.984|1.102|1.679|0.847|1.917|2.320|2.652|1.591|2.191|2.453|1.382|0.657	0.612	0.009719	red	IGHV3-49
P55072	TERA	1.31	1.326|1.256|1.432|1.271|0.739|1.142|0.750|0.477|1.389|1.377|1.782|1.564|0.909|1.405|0.923|0.587|1.424|1.268|1.606|1.347|0.783|1.210|0.795|0.505|1.059|0.892|1.255|1.064|0.665|0.849|0.621|0.395|1.871|1.575|2.216|1.689|1.064|1.573|1.097|0.698|1.648|1.387|1.952|1.646|0.833|1.475|0.967|0.615|1.705|1.435|2.019|1.694|0.985|1.522|0.987|0.682|2.682|2.257|3.176|2.665|1.549|2.394|1.067|0.696	0.573	0.002434	red	VCP
P21333	FLNA	1.31	1.311|1.340|1.416|1.379|0.993|1.131|1.096|0.570|0.975|1.008|1.095|1.102|0.793|0.903|0.875|0.456|1.513|1.485|1.674|1.679|1.209|1.376|1.334|0.694|0.984|1.021|1.111|1.022|0.746|0.844|0.834|0.434|2.065|2.143|2.333|2.125|1.562|1.783|1.751|0.912|1.549|1.607|1.750|1.560|1.183|1.279|1.313|0.684|1.179|1.223|1.332|1.258|0.906|1.032|1.277|0.733|2.265|2.351|2.560|2.418|1.740|1.982|1.085|0.582	0.504	0.0002142	red	FLNA
Q07507	DERM	1.3	2.816|2.184|2.727|2.748|2.138|2.129|2.706|3.175|1.277|1.120|1.310|1.238|0.963|0.959|1.218|1.430|1.524|0.946|1.510|1.233|0.959|0.955|1.213|1.424|1.256|0.891|1.187|0.987|0.762|0.773|0.993|1.166|2.018|1.431|1.906|1.542|1.228|1.246|1.595|1.872|1.351|0.959|1.277|1.082|0.855|0.836|1.069|1.254|1.265|0.897|1.195|1.016|0.790|0.787|0.790|0.778|1.078|0.765|1.018|0.866|0.673|0.671|0.771|0.698	0.58	0.0002349	red	DPT
P07359	GP1BA	1.3	0.917|0.888|1.386|1.070|0.889|0.947|1.173|0.624|0.819|0.777|1.185|0.901|0.750|0.798|0.989|0.526|1.301|1.202|1.992|1.507|1.253|1.334|1.653|0.879|1.059|1.005|1.640|1.277|1.034|1.120|1.364|0.726|1.545|1.466|2.392|1.786|1.495|1.623|1.990|1.059|1.793|1.702|2.777|2.167|1.779|1.890|2.310|1.229|0.776|0.737|1.202|0.912|0.758|0.807|1.562|0.855|1.459|1.385|2.260|1.714|1.425|1.517|1.218|0.659	0.486	7.569e-05	red	GNB1
P62873	GBB1	1.3	1.802|1.415|1.910|1.446|1.578|1.661|1.156|0.741|0.986|0.823|1.102|0.770|0.840|0.884|0.615|0.395|1.726|1.254|1.884|1.356|1.480|1.558|1.084|0.695|1.305|1.047|1.514|1.096|1.181|1.264|0.868|0.557|1.348|1.082|1.563|1.108|1.212|1.300|0.897|0.575|1.609|1.291|1.865|1.345|1.481|1.553|1.070|0.686|1.503|1.206|1.743|1.251|1.366|1.437|1.254|0.890|2.344|1.880|2.717|1.951|2.129|2.240|0.946|0.536	0.469	0.0001502	red	GP1BA
P27797	CALR	1.3	1.092|1.584|1.338|1.424|1.168|1.375|1.143|0.671|1.582|2.159|1.947|2.196|1.802|2.122|1.764|1.036|0.995|1.396|1.226|1.317|1.080|1.272|1.057|0.621|0.841|1.142|1.008|1.127|0.857|0.985|0.880|0.516|1.365|1.855|1.637|1.774|1.272|1.542|1.429|0.839|0.978|1.329|1.173|1.365|1.029|1.297|1.024|0.601|0.955|1.298|1.146|1.245|1.022|1.203|0.995|0.722|1.628|2.212|1.951|2.121|1.740|2.049|0.822|0.577	0.434	1.741e-05	red	CALR
Q53RD9	FBLN7	1.29	2.178|3.171|1.548|2.072|1.801|1.588|2.905|2.371|1.322|1.768|1.099|1.444|1.255|1.107|2.025|1.652|1.014|1.311|0.730|0.957|0.832|0.733|1.341|1.094|1.413|1.657|1.068|1.396|1.199|1.073|1.969|1.607|1.445|1.695|1.093|1.389|1.225|1.098|2.014|1.644|1.130|1.326|0.855|1.122|0.986|0.862|1.576|1.286|0.717|0.842|0.543|0.713|0.620|0.547|1.022|0.830|0.879|1.031|0.665|0.874|0.760|0.670|1.153|0.950	0.532	0.0006559	red	FBLN7
P14625	ENPL	1.29	2.229|1.479|1.845|2.328|1.409|1.892|2.014|1.137|1.710|1.302|1.535|2.037|1.233|1.656|1.762|0.995|1.249|0.937|1.037|1.283|0.777|1.043|1.110|0.627|1.259|0.934|1.011|1.339|0.817|1.078|1.165|0.658|1.497|1.110|1.202|1.555|0.993|1.241|1.385|0.782|1.685|1.249|1.352|1.733|1.120|1.442|1.558|0.880|1.081|0.802|0.868|1.156|0.700|0.940|1.154|0.676|1.915|1.420|1.536|2.047|1.239|1.664|1.091|0.596	0.409	4.289e-06	red	HSP90B1
P13645	K1C10	1.29	1.335|1.899|1.231|1.413|1.474|1.012|1.556|1.431|1.133|1.344|1.042|1.228|1.282|0.880|1.353|1.244|1.127|1.333|1.018|1.215|1.268|0.871|1.339|1.231|1.287|1.364|1.086|1.311|1.254|0.931|1.507|1.386|1.865|1.977|1.573|1.990|2.378|1.481|2.184|2.009|1.423|1.508|1.200|1.621|1.770|1.199|1.666|1.532|0.854|0.905|0.720|0.908|0.948|0.650|0.797|0.780|0.929|0.984|0.783|0.987|1.030|0.707|1.313|1.337	0.372	1.595e-07	red	KRT10
P00450	CERU	1.29	1.972|2.066|1.758|1.855|1.640|1.952|1.970|1.577|1.256|1.291|1.153|1.224|1.082|1.288|1.300|1.041|1.364|1.348|1.182|1.264|1.118|1.331|1.343|1.075|1.327|1.290|1.160|1.265|1.054|1.281|1.303|1.043|0.985|0.958|0.861|0.933|0.795|0.961|0.967|0.774|1.836|1.786|1.605|1.683|1.475|1.751|1.804|1.444|1.018|0.990|0.890|0.942|0.833|0.991|1.233|1.080|1.272|1.237|1.112|1.176|1.040|1.238|1.324|1.133	0.323	5.496e-10	red	CP
P43251	BTD	1.29	1.273|1.233|1.641|2.080|1.687|1.780|1.257|1.756|0.936|0.893|1.178|1.517|1.230|1.299|0.917|1.281|1.312|1.205|1.675|2.143|1.739|1.835|1.296|1.809|1.008|1.061|1.472|1.699|1.345|1.444|1.009|1.408|0.946|0.996|1.382|1.537|1.246|1.344|0.947|1.322|0.964|1.015|1.408|1.616|1.309|1.382|0.965|1.347|0.999|1.052|1.459|1.654|1.342|1.416|0.859|1.109|0.716|0.753|1.045|1.185|0.961|1.014|0.903|1.144	0.318	3.566e-10	red	BTD
Q86U17	SPA11	1.28	2.707|1.915|1.570|3.681|3.678|3.712|2.676|2.698|1.098|0.809|0.657|1.567|1.566|1.580|1.139|1.148|1.218|0.871|0.704|1.671|1.669|1.685|1.214|1.224|1.049|0.822|0.605|1.445|1.428|1.466|1.056|1.065|0.748|0.586|0.431|1.010|1.016|1.045|0.753|0.759|0.838|0.656|0.483|1.159|1.172|1.173|0.843|0.850|0.993|0.778|0.573|1.376|1.375|1.387|0.900|0.862|0.985|0.772|0.568|1.364|1.363|1.376|1.117|1.124	0.72	0.03284	red	SERPINA11
P06576	ATPB	1.28	1.682|1.441|1.588|1.208|1.049|1.009|1.351|0.552|1.355|1.216|1.404|1.090|0.947|0.911|1.219|0.498|1.587|1.289|1.513|1.143|0.992|0.955|1.278|0.522|1.415|1.137|1.374|1.068|0.907|0.887|1.167|0.477|2.072|1.665|2.012|1.470|1.271|1.248|1.709|0.698|1.699|1.365|1.650|1.256|1.090|1.064|1.401|0.572|1.213|0.974|1.178|0.894|0.776|0.747|1.542|0.714|2.970|2.387|2.884|2.190|1.902|1.830|1.042|0.429	0.516	0.001474	red	ATP5F1B
Q8WWZ8	OIT3	1.28	1.094|1.601|1.346|1.598|1.547|1.569|1.429|1.568|1.025|1.288|1.276|1.512|1.464|1.485|1.352|1.483|1.333|1.622|1.663|1.938|1.876|1.903|1.733|1.901|0.789|1.034|1.018|1.156|1.102|1.036|1.064|1.167|0.777|1.018|1.002|1.115|1.163|1.097|1.048|1.149|1.208|1.583|1.558|1.647|1.679|1.602|1.629|1.787|0.741|0.972|0.957|1.118|1.083|1.098|0.971|1.047|0.676|0.886|0.872|1.020|0.987|1.001|1.169|1.278	0.321	4.857e-09	red	OIT3
Q6UXH0	ANGL8	1.27	0.995|1.204|1.439|1.831|1.670|1.109|0.547|1.142|0.799|0.899|1.094|1.291|1.178|0.782|0.385|0.805|1.011|1.159|1.504|1.810|1.651|1.096|0.540|1.129|0.828|1.013|1.271|1.516|1.368|0.921|0.458|0.956|1.116|1.367|1.714|1.979|1.848|1.245|0.617|1.289|0.898|1.100|1.379|1.670|1.542|1.003|0.497|1.038|1.808|2.214|2.776|3.350|3.055|2.028|0.526|1.049|0.866|1.060|1.329|1.604|1.463|0.971|0.477|0.949	0.579	0.01316	red	ANGPTL8
P05109	S10A8	1.27	1.255|0.939|0.698|0.860|0.981|0.822|0.632|0.759|1.182|0.952|0.730|0.867|0.989|0.828|0.637|0.765|2.343|1.586|1.303|1.583|1.807|1.513|1.164|1.397|2.186|1.511|1.258|1.501|1.704|1.452|1.126|1.352|1.610|1.113|0.926|1.081|1.259|1.073|0.829|0.996|1.714|1.185|0.986|1.200|1.393|1.145|0.883|1.060|1.941|1.342|1.117|1.361|1.553|1.300|0.887|1.040|1.617|1.118|0.930|1.134|1.293|1.083|2.845|3.711	0.513	8.175e-05	red	IGHG1
P01857	IGHG1	1.27	1.374|0.998|1.276|0.924|0.690|1.001|1.178|0.826|2.390|1.846|2.468|1.870|1.397|2.026|2.384|1.672|1.012|0.748|0.962|0.677|0.505|0.733|0.863|0.605|1.525|1.048|1.453|1.038|0.751|1.138|1.334|0.936|2.145|1.474|2.044|1.427|1.069|1.593|1.876|1.316|2.066|1.420|1.969|1.448|1.074|1.510|1.807|1.268|1.143|0.786|1.089|0.784|0.586|0.850|1.158|0.835|1.630|1.120|1.553|1.118|0.835|1.212|0.946|0.607	0.487	0.0007907	red	THBS1
P07996	TSP1	1.27	0.988|0.964|1.203|1.783|1.509|1.588|1.262|0.680|0.876|0.893|1.082|1.638|1.386|1.459|1.159|0.624|0.738|0.803|0.919|1.394|1.180|1.241|0.986|0.531|0.847|0.867|1.044|1.564|1.289|1.386|1.099|0.592|1.043|1.069|1.286|1.804|1.486|1.675|1.354|0.729|1.144|1.172|1.411|2.206|1.799|1.877|1.485|0.800|0.771|0.789|0.950|1.413|1.196|1.258|1.121|0.613|1.431|1.466|1.764|2.624|2.221|2.336|2.278|1.420	0.457	0.0001631	red	S100A8
P02649	APOE	1.27	1.864|2.115|2.149|2.181|1.817|1.756|2.178|2.380|0.929|1.013|1.071|1.092|0.910|0.880|1.091|1.192|1.246|1.337|1.448|1.487|1.239|1.197|1.485|1.622|1.201|1.336|1.400|1.437|1.141|1.185|1.423|1.555|1.170|1.302|1.364|1.370|1.131|1.134|1.387|1.516|0.986|1.097|1.149|1.187|0.971|0.949|1.169|1.277|0.844|0.939|0.983|1.001|0.834|0.807|1.430|1.593|0.772|0.859|0.900|0.916|0.763|0.738|1.238|1.351	0.377	2.204e-07	red	APOE
P14618	KPYM	1.25	1.500|1.684|1.541|1.757|1.073|1.480|1.496|0.623|0.956|1.003|0.970|1.090|0.666|0.919|0.928|0.386|1.544|1.505|1.536|1.735|1.059|1.462|1.478|0.615|1.014|1.058|1.056|1.126|0.716|0.961|0.991|0.412|1.407|1.467|1.465|1.542|1.000|1.316|1.374|0.572|1.267|1.321|1.319|1.425|0.889|1.188|1.237|0.515|1.024|1.068|1.066|1.174|0.717|0.989|1.180|0.525|2.461|2.566|2.562|2.822|1.723|2.378|1.284|0.573	0.516	0.0128	red	PKM
Q14393	GAS6	1.25	1.370|1.615|2.178|1.511|1.658|1.413|1.390|1.391|1.140|1.308|1.770|1.324|1.453|1.238|1.218|1.219|1.490|1.680|2.328|1.678|1.842|1.570|1.544|1.545|0.969|1.125|1.489|0.925|1.046|0.963|0.990|0.991|0.908|1.053|1.394|0.901|1.142|0.807|0.927|0.928|1.029|1.194|1.581|1.142|1.360|0.991|1.051|1.052|0.979|1.136|1.504|1.087|1.193|1.017|0.808|0.787|0.978|1.135|1.503|1.086|1.192|1.016|0.813|0.792	0.326	6.825e-08	red	FCGBP
Q9Y6R7	FCGBP	1.25	1.579|1.591|1.583|1.662|1.604|1.641|2.020|1.388|1.134|1.122|1.124|1.449|1.399|1.431|1.761|1.210|1.157|1.116|1.134|1.241|1.198|1.225|1.508|1.036|1.367|1.340|1.326|1.424|1.600|1.443|2.053|1.410|0.980|0.961|0.951|1.169|1.143|1.192|1.472|1.011|1.253|1.229|1.216|1.552|1.519|1.531|1.882|1.293|0.666|0.653|0.646|0.823|0.794|0.813|1.146|0.793|0.970|0.950|0.940|1.197|1.156|1.183|0.988|0.678	0.319	3.884e-07	red	GAS6
Q9UBX5	FBLN5	1.25	1.416|1.313|1.347|1.357|1.305|1.269|1.212|1.178|1.379|1.267|1.435|1.395|1.342|1.305|1.247|1.211|1.403|1.367|1.454|1.362|1.310|1.274|1.217|1.182|1.050|0.951|1.071|0.999|1.050|0.876|0.906|0.880|1.581|1.432|1.614|1.460|1.575|1.316|1.365|1.326|1.486|1.346|1.517|1.434|1.541|1.245|1.282|1.246|1.159|1.050|1.183|1.119|1.077|1.047|1.219|1.154|1.193|1.081|1.217|1.152|1.108|1.078|1.008|0.935	0.179	2.2e-16	red	FBLN5
Q99439	CNN2	1.24	1.682|2.393|1.640|2.331|1.279|1.973|1.441|0.791|1.168|1.154|0.929|1.357|0.744|1.149|0.839|0.460|1.275|1.164|1.071|1.263|0.693|1.070|0.781|0.429|1.011|1.067|0.862|1.298|0.634|0.959|0.771|0.423|1.474|1.555|1.256|1.753|0.973|1.539|1.123|0.617|1.132|1.194|0.964|1.398|0.771|1.185|0.863|0.474|1.312|1.384|1.118|1.618|0.887|1.369|1.061|0.586|2.390|2.521|2.036|2.947|1.617|2.495|1.043|0.670	0.549	0.02799	red	CNN2
P07237	PDIA1	1.24	1.626|1.612|2.129|1.398|1.333|1.702|1.240|0.706|0.918|0.952|1.119|0.808|0.770|0.983|0.717|0.408|1.101|1.132|1.412|0.978|0.932|1.190|0.867|0.493|1.133|1.223|1.521|1.097|0.974|1.252|0.895|0.509|1.469|1.586|1.971|1.192|1.165|1.615|1.160|0.660|1.133|1.223|1.521|0.942|0.999|1.176|0.895|0.509|1.266|1.366|1.699|1.127|1.075|1.372|1.185|0.702|2.224|2.401|2.986|1.981|1.889|2.411|1.014|0.559	0.502	0.007168	red	P4HB
P04114	APOB	1.24	1.198|0.820|1.722|1.527|1.215|1.268|1.498|1.463|0.960|0.671|1.355|1.228|0.977|1.020|1.204|1.176|1.055|0.736|1.493|1.335|1.062|1.109|1.309|1.278|2.065|1.483|2.970|2.655|2.104|2.210|2.599|2.538|0.943|0.677|1.356|1.189|0.951|1.006|1.186|1.158|0.971|0.697|1.396|1.233|0.995|1.029|1.222|1.193|0.795|0.570|1.143|1.020|0.811|0.847|1.099|1.086|0.814|0.584|1.170|1.044|0.831|0.867|1.208|1.216	0.498	0.0008272	red	APOB
Q02818	NUCB1	1.24	0.954|1.241|0.977|1.643|1.487|1.165|1.315|1.673|0.945|1.144|0.977|1.564|1.416|1.109|1.251|1.592|0.960|1.178|0.993|1.609|1.457|1.141|1.288|1.638|0.782|1.024|0.833|1.302|1.245|0.990|1.083|1.378|1.268|1.659|1.350|2.115|1.965|1.561|1.755|2.233|1.115|1.460|1.188|1.951|1.781|1.369|1.544|1.964|0.722|0.945|0.769|1.250|1.131|0.886|0.866|1.062|0.568|0.743|0.605|0.982|0.889|0.696|0.826|0.986	0.38	3.693e-05	red	NUCB1
P08294	SODE	1.23	0.900|0.738|0.975|0.888|0.510|0.882|0.807|0.808|2.539|2.191|3.082|2.950|1.694|2.933|2.684|2.686|1.399|1.115|1.507|1.373|0.789|1.365|1.249|1.250|1.069|0.870|1.172|1.055|0.596|1.056|0.965|0.966|1.221|0.993|1.339|1.177|0.679|1.207|1.102|1.103|1.033|0.841|1.133|1.021|0.590|1.024|0.933|0.934|1.108|0.901|1.214|1.099|0.631|1.093|1.791|2.067|1.107|0.900|1.213|1.098|0.631|1.092|0.811|0.680	0.602	0.02307	red	SOD3
P30043	BLVRB	1.23	1.366|1.167|1.116|1.555|1.773|1.268|1.184|1.115|1.844|1.669|1.738|2.479|2.825|2.020|1.887|1.778|1.300|1.077|1.065|1.463|1.668|1.192|1.114|1.049|1.093|0.971|0.919|1.267|1.431|1.033|0.964|0.908|1.132|1.006|0.952|1.279|1.478|1.069|0.998|0.940|0.960|0.853|0.807|1.110|1.281|0.909|0.847|0.798|1.134|1.008|0.953|1.313|1.497|1.070|0.598|0.602|1.204|1.070|1.012|1.394|1.589|1.136|0.943|0.742	0.405	3.733e-05	red	IGHV1-24
A0A0C4DH33	HV124	1.23	1.213|1.283|1.256|1.062|0.931|0.949|0.721|1.067|1.388|1.456|1.495|1.321|1.158|1.180|0.896|1.328|0.965|1.001|0.994|0.851|0.746|0.760|0.578|0.855|1.204|1.200|1.242|1.098|0.953|0.984|0.724|1.072|1.827|1.820|1.884|1.458|1.438|1.321|1.098|1.627|2.058|2.050|2.122|1.904|1.555|1.632|1.237|1.832|1.664|1.658|1.716|1.473|1.292|1.317|0.682|0.951|1.123|1.119|1.159|0.995|0.873|0.889|0.484|0.619	0.389	0.0002778	red	BLVRB
P07195	LDHB	1.22	1.031|1.173|1.224|1.864|1.219|1.221|1.350|1.656|0.953|1.049|1.025|1.750|1.145|1.147|1.268|1.555|1.315|1.392|1.550|2.218|1.451|1.453|1.607|1.971|0.883|0.981|0.933|1.643|1.041|1.061|1.169|1.434|1.077|1.196|1.138|1.911|1.260|1.287|1.426|1.749|0.951|1.056|1.004|1.770|1.148|1.144|1.258|1.543|0.756|0.839|0.798|1.380|0.903|0.904|0.693|0.726|0.616|0.684|0.651|1.125|0.736|0.737|1.247|1.625	0.357	7.995e-05	red	LDHB
P14314	GLU2B	1.21	2.470|2.405|2.348|2.194|2.115|2.147|2.147|1.861|1.235|1.196|1.283|1.207|1.163|1.181|1.181|1.024|1.265|1.211|1.420|1.192|1.149|1.167|1.166|1.011|0.859|0.823|0.844|0.804|0.762|0.734|0.764|0.662|1.277|1.223|1.254|1.146|1.037|1.177|1.135|0.984|1.141|1.093|1.121|1.035|1.003|0.978|1.014|0.879|1.125|1.078|1.105|1.022|0.985|1.000|0.896|0.737|1.298|1.243|1.275|1.179|1.136|1.154|0.848|0.680	0.422	0.0004706	red	APOD
P05090	APOD	1.21	1.793|1.558|1.721|1.595|1.545|1.775|2.253|1.921|1.279|1.085|1.448|1.190|1.152|1.324|1.681|1.433|1.735|1.468|1.826|1.611|1.561|1.794|2.277|1.941|1.148|0.966|1.266|0.995|0.937|1.095|1.419|1.210|1.214|1.021|1.338|1.048|1.004|1.170|1.500|1.279|0.823|0.692|0.908|0.724|0.685|0.770|1.017|0.867|0.809|0.681|0.892|0.708|0.685|0.788|0.959|0.830|0.949|0.798|1.047|0.830|0.804|0.924|0.914|0.791	0.408	0.001377	red	PRKCSH
Q8WWA0	ITLN1	1.21	1.232|1.144|1.505|1.779|1.034|1.124|1.352|1.104|1.219|1.273|1.508|1.772|1.029|1.120|1.347|1.100|1.666|1.649|1.932|2.063|1.199|1.304|1.568|1.280|0.885|0.924|0.983|1.212|0.676|0.687|0.852|0.696|1.309|1.366|1.454|1.633|0.938|1.058|1.261|1.029|1.195|1.247|1.328|1.676|0.890|0.954|1.151|0.940|1.038|1.084|1.153|1.316|0.765|0.832|1.247|1.038|1.272|1.327|1.413|1.611|0.936|1.018|1.000|0.809	0.303	2.824e-06	red	ITLN1
Q14697	GANAB	1.21	1.125|1.251|1.000|1.391|1.151|1.074|1.156|0.826|1.136|1.133|1.032|1.469|1.216|1.135|1.221|0.873|1.485|1.346|1.318|1.849|1.530|1.428|1.537|1.098|1.142|1.132|1.036|1.300|1.061|0.974|1.085|0.775|1.457|1.445|1.322|1.603|1.346|1.341|1.384|0.989|1.296|1.285|1.176|1.372|1.144|1.108|1.231|0.880|1.053|1.044|0.955|1.203|0.996|0.929|1.172|0.982|1.473|1.461|1.337|1.684|1.393|1.300|0.997|0.866	0.22	1.134e-10	red	GANAB
P01344	IGF2	0.82	0.704|0.716|0.675|0.543|0.546|0.396|0.458|0.577|1.048|1.046|0.992|0.839|0.843|0.612|0.708|0.892|1.001|0.995|0.945|0.780|0.784|0.569|0.658|0.829|0.909|0.905|0.849|0.696|0.693|0.510|0.593|0.747|1.095|1.091|1.024|0.826|0.833|0.614|0.715|0.900|0.628|0.625|0.587|0.475|0.484|0.354|0.410|0.516|1.532|1.526|1.432|1.185|1.191|0.864|0.810|0.985|1.216|1.211|1.137|0.941|0.946|0.686|0.684|0.806	0.264	5.304e-08	green	IGF2
P11226	MBL2	0.82	0.650|1.079|0.741|0.474|0.541|0.648|0.815|0.960|1.059|1.349|0.969|0.593|0.677|0.810|1.020|1.201|0.926|1.267|0.874|0.589|0.672|0.805|1.013|1.193|0.953|1.325|0.846|0.585|0.637|0.776|0.977|1.151|0.695|0.965|0.616|0.434|0.505|0.545|0.712|0.838|0.661|0.918|0.586|0.432|0.448|0.549|0.677|0.798|0.976|1.356|0.865|0.582|0.664|0.794|0.749|0.887|0.829|1.151|0.735|0.494|0.564|0.675|1.157|1.431	0.253	2.276e-08	green	MBL2
A0A0B4J1Y9	HV372	0.79	0.669|0.508|0.536|0.587|0.648|0.486|0.619|0.483|0.873|0.670|0.694|0.759|0.837|0.628|0.800|0.625|0.622|0.539|0.485|0.606|0.669|0.502|0.639|0.499|1.425|1.251|1.113|1.396|1.638|1.278|1.467|1.146|0.750|0.658|0.586|0.829|0.875|0.694|0.772|0.603|0.549|0.482|0.429|0.570|0.626|0.494|0.565|0.442|0.971|0.852|0.759|0.949|1.047|0.785|0.837|0.628|1.243|1.091|0.971|1.215|1.340|1.005|0.786|0.584	0.292	3.044e-09	green	IGHV3-72
P00488	F13A	0.79	0.520|0.585|0.630|0.519|0.569|0.673|0.608|0.637|0.711|0.752|0.809|0.654|0.718|0.849|0.767|0.804|0.811|0.866|0.968|0.784|0.860|1.016|0.919|0.963|0.734|0.811|0.881|0.731|0.782|0.907|0.832|0.872|0.660|0.729|0.792|0.642|0.681|0.821|0.748|0.784|0.571|0.631|0.686|0.586|0.640|0.714|0.647|0.678|0.882|0.975|1.060|0.853|0.936|1.106|0.870|0.846|0.842|0.931|1.011|0.814|0.893|1.056|0.824|0.791	0.138	2.2e-16	green	F13A1
P05160	F13B	0.78	0.418|0.444|0.440|0.436|0.452|0.595|0.517|0.629|0.741|0.741|0.732|0.707|0.733|0.966|0.839|1.020|0.814|0.860|0.801|0.827|0.858|1.129|0.981|1.193|0.690|0.737|0.747|0.705|0.751|1.053|0.857|1.042|0.560|0.598|0.606|0.603|0.609|0.821|0.695|0.846|0.638|0.681|0.691|0.661|0.681|0.884|0.793|0.964|0.805|0.860|0.872|0.844|0.875|1.152|0.920|1.074|0.662|0.707|0.717|0.694|0.719|0.947|0.961|1.055	0.181	2.662e-13	green	F13B
P12273	PIP	0.77	0.453|0.650|0.728|0.418|0.429|0.713|0.442|0.881|0.450|0.597|0.638|0.366|0.375|0.624|0.387|0.771|0.430|0.645|0.688|0.398|0.408|0.679|0.420|0.838|0.888|1.264|1.429|0.823|0.833|1.425|0.861|1.718|0.640|0.911|1.031|0.597|0.591|1.016|0.621|1.239|0.557|0.793|0.896|0.494|0.511|0.890|0.540|1.077|1.031|1.467|1.659|0.946|0.971|1.615|0.482|0.825|0.517|0.736|0.832|0.474|0.487|0.810|0.488|0.837	0.335	4.129e-09	green	PIP
P19544	WT1	0.76	0.320|0.649|0.506|0.624|0.346|0.390|0.652|0.700|0.849|1.267|1.304|1.167|0.647|0.730|1.219|1.309|0.461|0.981|0.799|0.734|0.407|0.459|0.767|0.823|0.494|0.978|0.931|1.040|0.506|0.574|0.896|0.962|0.643|1.273|1.212|1.291|0.616|0.705|1.166|1.252|0.236|0.468|0.445|0.301|0.150|0.270|0.429|0.460|0.551|1.091|1.039|0.957|0.531|0.599|1.056|0.996|0.513|1.017|0.968|0.891|0.494|0.558|0.918|0.844	0.311	2.431e-08	green	WT1
B2RTY4	MYO9A	0.74	0.227|0.100|0.118|0.560|0.132|0.371|0.227|0.100|0.336|0.121|0.162|0.732|0.173|0.485|0.297|0.100|0.245|0.100|0.124|0.560|0.132|0.371|0.227|0.100|0.274|0.108|0.138|0.469|0.155|0.287|0.274|0.100|0.325|0.128|0.163|0.731|0.178|0.330|0.325|0.100|0.376|0.148|0.189|0.652|0.220|0.395|0.376|0.100|1.001|0.395|0.503|2.466|0.583|1.635|0.215|0.100|4.212|1.662|2.117|10.000|2.455|6.883|0.142|0.100	1.589	5.234e-12	green	MYO9A
