# Supplementary material for: Multiple Processes May Involve in the IgG4-RD Pathogenesis: An Integrative Study via Proteomic and Transcriptomic Analysis
Source: Front Immunol. 2020 Aug 20;11:1795. doi: 10.3389/fimmu.2020.01795 (PMC7468437; doi:10.3389/fimmu.2020.01795)
Supplement: Table S3 — Cytoscape Input nodes in turquoise. [file Table_3.XLSX]

## Sheet: Table S3 CytoscapeInput-nodes-t
Node name	Probe	Mode Color
ZNF521	226676_at	turquoise
ZMIZ1	212124_at	turquoise
ZEB2	228333_at	turquoise
ZCCHC24	212419_at	turquoise
ZC3HAV1L	228280_at	turquoise
ZBTB20	227082_at	turquoise
ZAK	225662_at	turquoise
XG	1554062_at	turquoise
WWTR1	202133_at	turquoise
WDR72	227174_at	turquoise
WASF2	224563_at	turquoise
VIT	227899_at	turquoise
VGLL3	227399_at	turquoise
VCAN	204619_s_at	turquoise
UST	205139_s_at	turquoise
TXNIP	201009_s_at	turquoise
TWSG1	225406_at	turquoise
TUBA1A	209118_s_at	turquoise
TSPAN7	202242_at	turquoise
TSPAN4	209264_s_at	turquoise
TRPC1	205802_at	turquoise
TRIO	209012_at	turquoise
TRHDE	219937_at	turquoise
TNXA	206093_x_at	turquoise
TNS1	221748_s_at	turquoise
TMTC1	226322_at	turquoise
TMOD2	226186_at	turquoise
TIMP3	201150_s_at	turquoise
TIMP2	224560_at	turquoise
THRB	228716_at	turquoise
THBS2	203083_at	turquoise
TGFBR2	208944_at	turquoise
TGFBI	201506_at	turquoise
TGFB1I1	209651_at	turquoise
TFPI	210664_s_at	turquoise
TFDP2	226157_at	turquoise
TFCP2L1	219735_s_at	turquoise
TENM1	205728_at	turquoise
TCF4	203753_at	turquoise
TBX3	219682_s_at	turquoise
TACC1	217437_s_at	turquoise
SULF2	224724_at	turquoise
SULF1	212353_at	turquoise
STOM	201060_x_at	turquoise
SSPN	204963_at	turquoise
SRGAP2C	228628_at	turquoise
SPRY1	212558_at	turquoise
SPCS3	218817_at	turquoise
SPARC	200665_s_at	turquoise
SPAG9	225339_at	turquoise
SOX7	228698_at	turquoise
SNAI2	213139_at	turquoise
SLIT2	209897_s_at	turquoise
SLC6A6	228754_at	turquoise
SLC27A6	219932_at	turquoise
SLC16A4	205234_at	turquoise
SIPA1L2	225056_at	turquoise
SH3D19	225162_at	turquoise
SFRP4	204051_s_at	turquoise
SESTD1	227041_at	turquoise
SERPING1	200986_at	turquoise
SEMA6D	226492_at	turquoise
SEMA3G	219689_at	turquoise
SDPR	222717_at	turquoise
SDC2	212157_at	turquoise
SCN7A	228504_at	turquoise
SCN4B	236359_at	turquoise
SCARA5	229839_at	turquoise
SASH1	226022_at	turquoise
SAMD4A	212845_at	turquoise
RUNX1T1	205528_s_at	turquoise
RP11-846E15.2	226365_at	turquoise
RNF150	236038_at	turquoise
RGS5	1555725_a_at	turquoise
RERGL	220276_at	turquoise
RERG	227758_at	turquoise
RECK	205407_at	turquoise
RCAN2	203498_at	turquoise
RBMS3	235570_at	turquoise
RBMS1	215127_s_at	turquoise
RASAL2	227036_at	turquoise
RARRES2	209496_at	turquoise
RAI2	219440_at	turquoise
PTRF	1557938_s_at	turquoise
PTPRG	227126_at	turquoise
PTPRB	230250_at	turquoise
PTPN13	204201_s_at	turquoise
PTPN12	202006_at	turquoise
PTGIS	208131_s_at	turquoise
PRTFDC1	222803_at	turquoise
PRRX1	205991_s_at	turquoise
PROS1	207808_s_at	turquoise
PRNP	201300_s_at	turquoise
PRKG1	228396_at	turquoise
PREX2	228692_at	turquoise
PPL	203407_at	turquoise
PPAP2B	209355_s_at	turquoise
PPAP2A	209147_s_at	turquoise
PMP22	210139_s_at	turquoise
PLXDC2	226865_at	turquoise
PLXDC1	219700_at	turquoise
PLSCR4	218901_at	turquoise
PLS3	201215_at	turquoise
PLP1	210198_s_at	turquoise
PLK2	201939_at	turquoise
PLEKHH2	227148_at	turquoise
PLAT	201860_s_at	turquoise
PLAGL1	207002_s_at	turquoise
PKD2	203688_at	turquoise
PID1	219093_at	turquoise
PHLDB2	225688_s_at	turquoise
PGM5	226303_at	turquoise
PER3	221045_s_at	turquoise
PDGFRA	203131_at	turquoise
PDGFD	219304_s_at	turquoise
PDE5A	227088_at	turquoise
PCSK5	205559_s_at	turquoise
PCOLCE2	219295_s_at	turquoise
PCOLCE	202465_at	turquoise
PCDH9	238919_at	turquoise
PCDH18	225975_at	turquoise
PAX3	231666_at	turquoise
P2RY14	206637_at	turquoise
OLFML2B	213125_at	turquoise
OLFML2A	213075_at	turquoise
OLFML1	217525_at	turquoise
NUCKS1	224581_s_at	turquoise
NTRK2	221796_at	turquoise
NRP1	212298_at	turquoise
NRN1	218625_at	turquoise
NR2F2	209120_at	turquoise
NR1D2	225768_at	turquoise
NOX4	219773_at	turquoise
NOVA1	205794_s_at	turquoise
NID1	202007_at	turquoise
NFIB	213032_at	turquoise
NEURL1B	225355_at	turquoise
NET1	201829_at	turquoise
NEGR1	229461_x_at	turquoise
NAV1	224772_at	turquoise
NANS	218189_s_at	turquoise
MYOF	201798_s_at	turquoise
MYO1B	212364_at	turquoise
MSRB3	225782_at	turquoise
MRC2	37408_at	turquoise
MRC1	204438_at	turquoise
MOB3B	226844_at	turquoise
MMRN2	219091_s_at	turquoise
MMP27	220783_at	turquoise
MKL2	218259_at	turquoise
MIR100HG	225381_at	turquoise
MINOS1-NBL1 /// NBL1	37005_at	turquoise
MGP	202291_s_at	turquoise
MFAP5	209758_s_at	turquoise
MFAP4	212713_at	turquoise
MET	203510_at	turquoise
MEOX2	206201_s_at	turquoise
MEOX1	205619_s_at	turquoise
MEG3	226210_s_at	turquoise
MCC	226225_at	turquoise
MCAM	210869_s_at	turquoise
MAP1B	212233_at	turquoise
MAN1C1	218918_at	turquoise
MAB21L2	210302_s_at	turquoise
LYVE1	219059_s_at	turquoise
LUM	201744_s_at	turquoise
LTF	202018_s_at	turquoise
LTBP2	204682_at	turquoise
LTBP1	202729_s_at	turquoise
LRRN4CL	1556427_s_at	turquoise
LRRFIP1	223492_s_at	turquoise
LOC102725271 /// NTM	227566_at	turquoise
LOC100996668 /// ZEB1	212764_at	turquoise
LOC100506558 /// MATN2	202350_s_at	turquoise
LMO3	204424_s_at	turquoise
LINC01279	227061_at	turquoise
LHX8	1569469_a_at	turquoise
LHFP	218656_s_at	turquoise
LGR5	213880_at	turquoise
LEPR	209894_at	turquoise
LDB2	206481_s_at	turquoise
LAMC1	200771_at	turquoise
LAMA4	202202_s_at	turquoise
LAMA2	205116_at	turquoise
KRT19	201650_at	turquoise
KLHL29	229310_at	turquoise
KLF3-AS1	219871_at	turquoise
KITLG	226534_at	turquoise
KCNT2	234103_at	turquoise
KCNB1	211006_s_at	turquoise
KANK2	218418_s_at	turquoise
JAM3	212813_at	turquoise
JAM2	229127_at	turquoise
JAG1	209099_x_at	turquoise
ITPRIPL2	227792_at	turquoise
ITGBL1	205422_s_at	turquoise
ITGA9	227297_at	turquoise
ISM1	235182_at	turquoise
IGFBP7	201162_at	turquoise
IGFBP6	203851_at	turquoise
IGF2	202409_at	turquoise
HSPA12B	229172_at	turquoise
HMCN1	235944_at	turquoise
HIP1	205425_at	turquoise
HGF	209960_at	turquoise
HEG1	213069_at	turquoise
HDGFRP3	209524_at	turquoise
GUCY1A3	229530_at	turquoise
GUCY1A2	236335_at	turquoise
GSN	200696_s_at	turquoise
GPR124	221814_at	turquoise
GPR116	212950_at	turquoise
GPM6B	209167_at	turquoise
GPC3	209220_at	turquoise
GNG11	204115_at	turquoise
GNAL	214071_at	turquoise
GLT8D2	227070_at	turquoise
GHR	205498_at	turquoise
GFRA1	227550_at	turquoise
GDF10	206159_at	turquoise
GAS7	202191_s_at	turquoise
GAS1	204457_s_at	turquoise
GALNT15	228501_at	turquoise
GABRB2	242344_at	turquoise
FZD7	203705_s_at	turquoise
FSTL1	208782_at	turquoise
FRY	204072_s_at	turquoise
FRMD3	230645_at	turquoise
FNDC1	226930_at	turquoise
FN1	210495_x_at	turquoise
FLRT2	204359_at	turquoise
FIBIN	226769_at	turquoise
FGL2	227265_at	turquoise
FGF7	205782_at	turquoise
FGF2	204422_s_at	turquoise
FERMT2	209210_s_at	turquoise
FBN1	202765_s_at	turquoise
FBLN5	203088_at	turquoise
FBLN2	203886_s_at	turquoise
FBLN1	202994_s_at	turquoise
FAXDC2	48031_r_at	turquoise
FAM92A1	228011_at	turquoise
FABP4	203980_at	turquoise
ERMP1	218342_s_at	turquoise
EPS8	202609_at	turquoise
EPB41L2	201719_s_at	turquoise
EMP2	225078_at	turquoise
EMP1	201324_at	turquoise
EMCN	227874_at	turquoise
ELTD1	219134_at	turquoise
EGFR	224999_at	turquoise
EFHD1	209343_at	turquoise
EFEMP1	201842_s_at	turquoise
EDNRA	204463_s_at	turquoise
EDIL3	225275_at	turquoise
ECSCR	228339_at	turquoise
ECM2	206101_at	turquoise
EBF2	244885_at	turquoise
EBF1	227646_at	turquoise
DZIP1	204557_s_at	turquoise
DST	212254_s_at	turquoise
DPYSL3	201431_s_at	turquoise
DPYSL2	200762_at	turquoise
DPT	207977_s_at	turquoise
DOCK4	205003_at	turquoise
DNM3OS	232090_at	turquoise
DLC1	210762_s_at	turquoise
DKK3	214247_s_at	turquoise
DKK2	219908_at	turquoise
DIRAS3	215506_s_at	turquoise
DIO2	203699_s_at	turquoise
DFNA5	203695_s_at	turquoise
DDR2	227561_at	turquoise
DCN	201893_x_at	turquoise
DAB2 /// LOC101926921	201278_at	turquoise
CYYR1	228665_at	turquoise
CYBRD1	222453_at	turquoise
CXCL12	203666_at	turquoise
CRTAP	1554464_a_at	turquoise
CPXM2	226824_at	turquoise
CPQ	203501_at	turquoise
CPED1	228728_at	turquoise
COLEC12	221019_s_at	turquoise
COL8A2	221900_at	turquoise
COL6A3	201438_at	turquoise
COL6A1	213428_s_at	turquoise
COL5A2	221729_at	turquoise
COL5A1	203325_s_at	turquoise
COL3A1	211161_s_at	turquoise
COL21A1	208096_s_at	turquoise
COL1A2	229218_at	turquoise
COL1A1	1556499_s_at	turquoise
COL15A1	203477_at	turquoise
COL14A1	212865_s_at	turquoise
COL12A1	225664_at	turquoise
COCH	1554242_a_at	turquoise
CNRIP1	226751_at	turquoise
CNN3	201445_at	turquoise
CLIP4	226425_at	turquoise
CLEC3B	205200_at	turquoise
CLDN11	228335_at	turquoise
CILP	206227_at	turquoise
CHRDL1	209763_at	turquoise
CFH	215388_s_at	turquoise
CFD	205382_s_at	turquoise
CEP68	212675_s_at	turquoise
CDO1	204154_at	turquoise
CDH19	206898_at	turquoise
CD93	202878_s_at	turquoise
CD36	228766_at	turquoise
CD109	226545_at	turquoise
CCDC80	225241_at	turquoise
CAV2	203324_s_at	turquoise
CAV1	203065_s_at	turquoise
CALCRL	234996_at	turquoise
CACHD1	225627_s_at	turquoise
C20ORF194	226607_at	turquoise
C1R	212067_s_at	turquoise
C14ORF132	218820_at	turquoise
C10ORF10	209183_s_at	turquoise
BOC	225990_at	turquoise
BNIP2	226280_at	turquoise
BMP5	205430_at	turquoise
BICC1	213429_at	turquoise
AVPR1A	238835_at	turquoise
ATP2B4	212136_at	turquoise
ASAP2	206414_s_at	turquoise
ARHGAP6	206167_s_at	turquoise
AQP1	209047_at	turquoise
AOC3	204894_s_at	turquoise
ANXA1	201012_at	turquoise
ANTXR1	224694_at	turquoise
ANPEP	202888_s_at	turquoise
ANK2	202920_at	turquoise
ANGPTL2	213001_at	turquoise
ANGPTL1	224339_s_at	turquoise
AMIGO3	219920_s_at	turquoise
AKT3	212609_s_at	turquoise
AKAP12	210517_s_at	turquoise
AHR	202820_at	turquoise
AHNAK	211986_at	turquoise
AGTR1	205357_s_at	turquoise
ADIRF	203571_s_at	turquoise
ADH4	231678_s_at	turquoise
ADH1B	209612_s_at	turquoise
ADAMTS5	229357_at	turquoise
ACKR3	212977_at	turquoise
ABI3BP	223395_at	turquoise
ABCA9	242541_at	turquoise
ABCA8	1565778_at	turquoise
ABCA6	217504_at	turquoise
A2M	217757_at	turquoise
2020-09-11	201307_at	turquoise
2020-09-10	212698_s_at	turquoise
