# Supplementary material for: Multiple Processes May Involve in the IgG4-RD Pathogenesis: An Integrative Study via Proteomic and Transcriptomic Analysis
Source: Front Immunol. 2020 Aug 20;11:1795. doi: 10.3389/fimmu.2020.01795 (PMC7468437; doi:10.3389/fimmu.2020.01795)
Supplement: Table S6 — Cytoscape Input edges in yellow. [file Table_6.XLSX]

## Sheet: Table S6 CytoscapeInput-edges-y
From node	To node	Weight	Direction	From probe	To probe
DENND2C	RHOBTB1	0.200039	undirected	7918768	7933821
RNVU1-15	CHN1	0.200074	undirected	7919560	8056890
AKAP6	LILRA5	0.200088	undirected	7973850	8039236
HGD	HIST1H2BC	0.200088	undirected	8089851	8124406
RPL23	STRADB	0.200107	undirected	8014755	8047443
HIST2H4A	PLOD2	0.200113	undirected	7919627	8091283
HIST2H3PS2	HIST1H2BB	0.200117	undirected	7919614	8124394
RNVU1-3	HIST1H3A	0.200129	undirected	7904480	8117330
EIF4A2	NA	0.200187	undirected	8084708	8117583
RNVU1-15	OSM	0.200199	undirected	7919560	8075316
NA	RNU6-759P	0.200199	undirected	7926983	8065990
FAXDC2	MYCT1	0.20021	undirected	8115397	8122860
SOCS3	MFSD2B	0.200216	undirected	8018864	8040522
HSPA2	HIST1H2BI	0.200217	undirected	7975076	8117429
HIST1H3H	HIST1H3B	0.200218	undirected	8117589	8124388
GGTA1P	MT-TQ	0.200259	undirected	8163908	8165694
CLEC1B	MMRN1	0.200283	undirected	7961102	8096415
CD14	COX7B	0.200283	undirected	8114612	8168470
HIST2H2BE	HIST1H1A	0.20029	undirected	7919637	8124380
CLEC1B	ZNF385D	0.200305	undirected	7961102	8085774
GAS5	PVALB	0.200315	undirected	7922406	8075838
RNU5E-1	PUM1	0.200322	undirected	7897801	7914322
FAXDC2	HIST1H2AI	0.20034	undirected	8115397	8117580
HBD	CCDC175	0.200341	undirected	7946041	7979444
RNU5E-1	PUM1	0.200353	undirected	7897801	7914324
FABP5	MMRN1	0.200354	undirected	7948420	8096415
HIST2H2BB	CKS2	0.200365	undirected	7919606	8156290
RNVU1-15	HBD	0.200396	undirected	7919560	7946041
GP1BA	HIST1H2AL	0.200415	undirected	8004024	8117608
F5	AREG	0.200427	undirected	7922174	8095744
GP1BA	HIST1H3B	0.200435	undirected	8004024	8124388
SNHG12	GAS5	0.200443	undirected	7914202	7922410
RNVU1-15	GAS5	0.200445	undirected	7919560	7922410
FSTL1	USP46	0.200446	undirected	8089835	8100328
AREG	CD14	0.200466	undirected	8095744	8114612
RGS6	HIST1H2BB	0.200484	undirected	7975482	8124394
HIST1H2AE	NA	0.200525	undirected	8117408	8161943
MTND2P19	HIST1H3H	0.200536	undirected	8055486	8117589
HIST2H3PS2	HIST1H3J	0.200559	undirected	7919612	8124537
RNVU1-3	HIST1H3A	0.20057	undirected	7904963	8117330
RNVU1-15	TMEM40	0.200576	undirected	7919560	8085393
TUBB1	LY6G6F	0.200588	undirected	8063716	8178063
CCDC175	CLU	0.200601	undirected	7979444	8149927
SOCS1	PROS2P	0.200607	undirected	7999423	8089011
HSPA8	TFPI	0.20062	undirected	7952335	8057599
PDE3A	DCAF12	0.200625	undirected	7954293	8160756
NR4A2	AREG	0.200626	undirected	8055952	8095744
CTTN	MT-TQ	0.200636	undirected	7942204	8165694
HIST1H2BM	HIST1H3B	0.200653	undirected	8117594	8124388
SNHG12	SNORA33	0.20066	undirected	7914212	8122144
SNHG1	SNORA33	0.200671	undirected	7948910	8122144
IL10	CTTN	0.200671	undirected	7923907	7942204
KIR3DX1	TMEM40	0.200672	undirected	8031200	8085393
MYCT1	LY6G6F	0.200694	undirected	8122860	8178063
HIST1H3F	MPIG6B	0.200742	undirected	8124437	8178074
HIST2H2BB	HSPA8	0.200772	undirected	7919584	7952335
DENND2C	HIST1H2BH	0.200772	undirected	7918768	8117426
HIST1H2BN	LY6G6F	0.20084	undirected	8117600	8178063
STRADB	P2RY12	0.200841	undirected	8047443	8091530
PVALB	MT-TQ	0.200848	undirected	8075838	8165694
RNVU1-15	ELOVL7	0.200882	undirected	7919560	8112274
SLC7A5	JUNB	0.200903	undirected	8003298	8026047
PVALB	HIST1H2BH	0.200906	undirected	8075838	8117426
HSPA2	DUSP4	0.200911	undirected	7975076	8150076
SELP	SOCS1	0.200912	undirected	7922200	7999423
ALOX12	OSM	0.200913	undirected	8004221	8075316
MT-TQ	CTTN	0.200916	undirected	7911335	7942204
MTND2P19	ELOVL2-AS1	0.200922	undirected	8055486	8116904
RNVU1-15	EIF4A2	0.200957	undirected	7919556	8084708
MT-TQ	PVALB	0.200972	undirected	7911335	8075838
RNU6-921P	HMGB2	0.200976	undirected	7979811	8103728
JUNB	APOBEC3A	0.200983	undirected	8026047	8073056
GAS5	PKHD1L1	0.200988	undirected	7922412	8147891
HIST2H3PS2	HIST1H2BN	0.201008	undirected	7919614	8117600
SNORD101	HIST1H3J	0.201037	undirected	8122142	8124537
NEXN	SELP	0.201042	undirected	7902495	7922200
SNHG12	DENND2C	0.201046	undirected	7914212	7918768
NUSAP1	HIST1H2AM	0.201049	undirected	7982889	8124540
DUSP4	MPIG6B	0.20108	undirected	8150076	8179313
HIST1H2BN	LY6G6F	0.201086	undirected	8117600	8118235
LGALSL	PLK2	0.201095	undirected	8042283	8112202
AKAP6	SLC7A5	0.201103	undirected	7973850	8003298
FSTL1	HIST1H2AJ	0.201108	undirected	8089835	8124518
MPIG6B	DUSP4	0.201119	undirected	8118249	8150076
HIST2H2BE	HIST1H2AL	0.201141	undirected	7919637	8117608
SHTN1	SLC7A5	0.201163	undirected	7936529	8003298
MT-ND2	SNORA2A	0.201174	undirected	7896748	7962827
ELOVL7	HIST1H2BB	0.201176	undirected	8112274	8124394
RNU6-759P	GAGE12J	0.201186	undirected	8065990	8167560
HIST2H2BE	RN7SL472P	0.201191	undirected	7919637	7981333
FABP5	HBEGF	0.2012	undirected	7948420	8114572
SLC7A5	RNU6-407P	0.201203	undirected	8003298	8065853
ALOX12	ABLIM3	0.201222	undirected	8004221	8109093
RPL23	GAGE12J	0.201229	undirected	8014755	8167560
TUBB1	LY6G6F	0.201234	undirected	8063716	8118235
HIST2H3PS2	HIST1H2BB	0.20126	undirected	7905085	8124394
LY6G6F	MYCT1	0.201262	undirected	8118235	8122860
SNHG1	HGD	0.201266	undirected	7948902	8089851
LGALSL	MMRN1	0.201271	undirected	8042283	8096415
HSPA8	ELOVL7	0.201283	undirected	7952335	8112274
PER1	SEMA3A	0.201283	undirected	8012349	8140668
EIF5	EIF4A2	0.201299	undirected	7977075	8084704
HIST1H2BM	HIST1H2BB	0.201332	undirected	8117594	8124394
OSER1	SYAP1	0.201355	undirected	8066402	8166219
MYCT1	CLU	0.201376	undirected	8122860	8149927
SELP	C15orf54	0.201376	undirected	7922200	7982593
HIST2H2BB	HIST1H3J	0.201392	undirected	7919606	8124537
STRADB	SNCA	0.201411	undirected	7901336	8101762
SLFN14	MPIG6B	0.201414	undirected	8014259	8178074
RGS18	SLC14A1	0.20142	undirected	7908376	8021081
NEXN	E2F6P4	0.201427	undirected	7902495	8175365
HIST1H2BN	HIST1H2BO	0.201445	undirected	8117600	8117614
PLOD2	NA	0.201458	undirected	8091283	8117583
MMRN1	EYS	0.20146	undirected	8096415	8127396
SNORA37	HIST1H2BI	0.201467	undirected	8023392	8117429
SLC7A5	DYNLT1	0.201487	undirected	8003298	8130499
NUSAP1	HIST1H2BC	0.201507	undirected	7982889	8124406
RNU5E-1	HIST1H2AI	0.201516	undirected	7897801	8117580
RN7SL472P	HIST1H2BN	0.201593	undirected	7981333	8117600
HBA2	RPL23	0.201599	undirected	7991762	8014755
DENND2C	MYCT1	0.20161	undirected	7918768	8122860
PRKAR2B	PKHD1L1	0.201619	undirected	8135378	8147891
UBE2MP1	MTND4P12	0.201624	undirected	8001111	8114211
RNA5SP31	MTND2P24	0.201632	undirected	7969358	8173156
RNU6-921P	TNFAIP3	0.201668	undirected	7979811	8122265
HBA2	RPL23	0.201686	undirected	7991766	8014755
NA	HIST1H2AE	0.201689	undirected	8021368	8117408
HIST2H2BE	HIST1H4D	0.201692	undirected	7919637	8124413
SLC7A5	OLFM2	0.201697	undirected	8003298	8033818
ENKUR	TREML1	0.201711	undirected	7932598	8126269
GAS5	SNHG1	0.201729	undirected	7922400	7948902
SOCS1	CLU	0.201738	undirected	7999423	8149927
HIST1H2AI	NA	0.201749	undirected	8117580	8127423
MMRN1	SPARC	0.201758	undirected	8096415	8115327
ABLIM3	HIST1H2BB	0.20179	undirected	8109093	8124394
CCDC175	GP1BA	0.201798	undirected	7979444	8004024
GAS5	PLK2	0.2018	undirected	7922400	8112202
RAB27B	MPIG6B	0.201816	undirected	8021301	8118249
EIF4A2	ABCB4	0.201829	undirected	8084708	8140752
RNU5E-1	MT-CO1	0.201831	undirected	7897801	8113356
PDE3A	EGF	0.201838	undirected	7954293	8096845
HIST1H3B	MPIG6B	0.201849	undirected	8124388	8178074
RGS13	LY6G6F	0.20185	undirected	7908397	8178063
STRADB	RPL23	0.20188	undirected	7901336	8014755
RNVU1-15	HIST1H2BN	0.201904	undirected	7919556	8117600
GAS5	RNU6-918P	0.201906	undirected	7922414	8156759
HGD	HIST1H3H	0.201915	undirected	8089851	8117589
GYPA	MPIG6B	0.201929	undirected	8102998	8118249
HIST2H2BB	RPL23	0.201952	undirected	7919584	8014755
HIST1H2BN	DUSP4	0.201957	undirected	8117600	8150076
RNU6-1101P	HIST1H2BH	0.201978	undirected	8092886	8117426
HIST1H2BB	HIST1H3F	0.201985	undirected	8124394	8124437
HIST1H2BM	HIST1H2BN	0.201988	undirected	8117594	8117600
RNVU1-15	EIF4A2	0.202003	undirected	7919560	8084708
LGALSL	PKHD1L1	0.202006	undirected	8042283	8147891
RNVU1-6	RPL23	0.202074	undirected	7904715	8014755
OLFM2	JMY	0.202076	undirected	8033818	8106516
SNORA80E	MND1	0.202079	undirected	7920873	8097857
OR2T8	PF4	0.202103	undirected	7911233	8100966
GRAPL	LILRA5	0.202137	undirected	8005549	8039236
PF4	MT-TQ	0.202155	undirected	8100966	8165694
SNHG1	SNHG5	0.20217	undirected	7948904	8127987
MT-TQ	PF4	0.202192	undirected	7911335	8100966
RN7SL472P	PTGS1	0.202195	undirected	7981333	8157650
RPL23	IGF2BP3	0.202214	undirected	8014755	8138566
F5	HMGB2	0.20224	undirected	7922174	8103728
NA	SNORD101	0.202254	undirected	7928907	8122142
APOBEC3A	SH3BGRL2	0.202278	undirected	8073056	8120833
PDE3A	SOCS1	0.20229	undirected	7954293	7999423
RGS13	PLK2	0.202301	undirected	7908397	8112202
MMRN1	FABP5	0.202305	undirected	8096415	8147049
NEXN	GAS5	0.202318	undirected	7902495	7922414
CTTN	HSPA8	0.202347	undirected	7942204	7952335
HIST2H4A	HBD	0.202364	undirected	7905067	7946041
RNU6-759P	FABP5	0.20239	undirected	8065990	8147049
SNORA80E	CCDC175	0.202391	undirected	7920873	7979444
TFPI	HIST1H2BH	0.202412	undirected	8057599	8117426
NA	FSTL1	0.202412	undirected	8021368	8089835
SNORA2A	UBE2MP1	0.202424	undirected	7962827	8001111
MPL	OSM	0.20245	undirected	7900683	8075316
ZNF385D	PLOD2	0.20248	undirected	8085774	8091283
HIST2H3PS2	HIST1H2BN	0.202551	undirected	7905085	8117600
GYPA	ABLIM3	0.202582	undirected	8102998	8109093
AVPI1	SNORA2A	0.202605	undirected	7935521	7962827
MFSD2B	LY6G6F	0.20262	undirected	8040522	8178063
F5	AREG	0.202626	undirected	7922174	8095736
PDE3A	NA	0.202626	undirected	7954293	8117583
SOCS1	SNORA37	0.202636	undirected	7999423	8023392
RNU5E-1	PVALB	0.202641	undirected	7897801	8075838
FSTL1	NA	0.202649	undirected	8089835	8119076
RNVU1-15	HIST1H2BO	0.202652	undirected	7919560	8117614
RNU6-82P	GPC2	0.202654	undirected	7968295	8141463
DDX11L16	IGF2BP3	0.202661	undirected	8054758	8138566
RAB27B	MMRN1	0.20267	undirected	8021301	8096415
HBA2	LTBP1	0.202685	undirected	7991762	8041383
CMTM5	HIST1H2BJ	0.202698	undirected	7973403	8124484
HIST1H2BO	PTGS1	0.202702	undirected	8117614	8157650
CCDC175	PRKAR2B	0.202704	undirected	7979444	8135378
MFSD2B	LY6G6F	0.202711	undirected	8040522	8118235
RGS13	LY6G6F	0.20272	undirected	7908397	8118235
HIST1H2AI	HIST1H2BB	0.202723	undirected	8117580	8124394
MPL	USP46	0.202729	undirected	7900683	8100328
NEXN	PROS1	0.202774	undirected	7902495	8089015
HGD	HIST1H3H	0.202784	undirected	8093278	8117589
EIF4A2	MTND4P12	0.202794	undirected	8084708	8114211
ABLIM3	HIST1H2AB	0.202818	undirected	8109093	8124391
MMRN1	HIST1H3J	0.202849	undirected	8096415	8124537
HBA2	LTBP1	0.202857	undirected	7991766	8041383
SELP	HIST1H3J	0.202892	undirected	7922200	8124537
GAS5	PLOD2	0.202918	undirected	7922400	8091283
ALOX12	NA	0.202928	undirected	8004221	8117583
PVALB	NA	0.202961	undirected	8075838	8117583
HIST2H4A	HBD	0.202969	undirected	7919627	7946041
GUCY1B1	MT-TQ	0.202981	undirected	8097973	8165694
MFSD2B	RNU6-759P	0.202993	undirected	8040522	8065990
SH3BGRL2	HIST1H2BB	0.202996	undirected	8120833	8124394
BMP6	BEND2	0.203023	undirected	8116818	8171545
CTLA4	USP46	0.203024	undirected	8047692	8100328
SNORA80E	GNG11	0.203061	undirected	7920873	8134257
MEIS1	CA2	0.203066	undirected	8042356	8147132
SNHG1	PVALB	0.203067	undirected	7948900	8075838
DDX11L16	TFPI	0.203067	undirected	8054758	8057599
HIST1H2BN	PKHD1L1	0.203118	undirected	8117600	8147891
HIST1H2BO	GNG11	0.203143	undirected	8117614	8134257
CLEC1B	HIST1H2BN	0.203145	undirected	7961102	8117600
RGS1	NR4A2	0.203166	undirected	7908388	8055952
SNHG1	RPL23	0.203166	undirected	7948906	8014755
RPL23	HIST1H2BG	0.203171	undirected	8014755	8124423
MT-TQ	GUCY1B1	0.203185	undirected	7911335	8097973
SOCS3	HIST1H2AE	0.203192	undirected	8018864	8117408
EIF4A2	HIST1H2AH	0.203218	undirected	8084708	8117543
CLEC1B	SOCS3	0.20322	undirected	7961102	8018864
USP46	ABCB4	0.203282	undirected	8100328	8140752
OSER1	NSA2	0.20329	undirected	8066402	8106278
KIR3DX1	MMRN1	0.203291	undirected	8031200	8096415
HBEGF	FABP5	0.203299	undirected	8114572	8147049
RNA5SP31	HIST1H2BI	0.203313	undirected	7969358	8117429
EIF5	NA	0.203318	undirected	7977075	8143383
SNORA2A	HIST1H2AK	0.203323	undirected	7962827	8124524
MPL	FABP5	0.203429	undirected	7900683	7948420
TAF13	OSER1	0.203442	undirected	7918284	8066402
GAS5	MMRN1	0.203451	undirected	7922414	8096415
PDE3A	VTRNA1-3	0.203453	undirected	7954293	8108631
RNVU1-3	PUM1	0.203474	undirected	7904480	7914324
HIST1H2AE	NA	0.20348	undirected	8117408	8127423
RNU4ATAC	HIST1H3H	0.203508	undirected	8044961	8117589
PROS2P	HIST1H2BB	0.203518	undirected	8089011	8124394
MEIS1	PROS1	0.203523	undirected	8042356	8089015
FABP5	RPL23	0.203528	undirected	7948420	8014755
HGD	HIST1H2AM	0.20356	undirected	8093278	8124540
HSPA2	ALOX12	0.20356	undirected	7975076	8004221
RNVU1-15	CAVIN2	0.203593	undirected	7919560	8057797
HIST2H3PS2	HIST1H3A	0.203611	undirected	7919614	8117330
CD14	DYNLT1	0.203625	undirected	8114612	8130499
RNVU1-3	PUM1	0.203643	undirected	7904480	7914322
RNVU1-15	TREML1	0.203653	undirected	7919556	8126269
MPIG6B	PKHD1L1	0.203654	undirected	8118249	8147891
AKAP6	TNFAIP3	0.203665	undirected	7973850	8122265
RNVU1-15	HIST1H2AI	0.203678	undirected	7919556	8117580
RGS18	RGS6	0.203689	undirected	7908376	7975482
GP1BA	GYPA	0.203695	undirected	8004024	8102998
EGF	DUSP4	0.203696	undirected	8096845	8150076
GUCY1B1	HIST1H3F	0.203711	undirected	8097973	8124437
C15orf54	PLOD2	0.203717	undirected	7982593	8091283
USP46	HIST1H2AH	0.203734	undirected	8100328	8117543
HIST2H2BE	IFIT1B	0.203744	undirected	7919637	7929061
NA	RNU6-918P	0.203747	undirected	7922416	8156759
ALOX12	HIST1H3H	0.203773	undirected	8004221	8117589
PVALB	LINC00328-2P	0.203795	undirected	8075838	8161375
MPL	HIST1H2BJ	0.203799	undirected	7900683	8124484
DENND2C	HIST1H2AJ	0.203815	undirected	7918768	8124518
CCDC175	VTRNA1-3	0.203817	undirected	7979444	8108631
RNVU1-15	CTTN	0.203835	undirected	7919560	7942204
GAS5	OSM	0.203838	undirected	7922400	8075316
HIST1H2AH	NA	0.203861	undirected	8117543	8117583
HBB	LTBP1	0.203864	undirected	7946033	8041383
ZNF385D	SPARC	0.203867	undirected	8085774	8115327
GAS5	SNHG5	0.203885	undirected	7922414	8127987
NA	ZNF385D	0.203905	undirected	7926983	8085774
GAS5	CTLA4	0.203939	undirected	7922408	8047692
RN7SL472P	TREML1	0.203948	undirected	7981333	8126269
RNA5SP31	ZFAS1	0.203962	undirected	7969358	8063345
RGS1	ITGA2B	0.203964	undirected	7908388	8016044
HIST1H2BH	NA	0.204006	undirected	8117426	8127423
LGALSL	GYPA	0.204013	undirected	8042283	8102998
PROS2P	MPIG6B	0.204017	undirected	8089011	8118249
NA	SNHG1	0.204037	undirected	7928907	7948904
RNVU1-6	SH3BGRL2	0.204041	undirected	7904715	8120833
MMRN1	HIST1H2AB	0.204049	undirected	8096415	8124391
JAM3	DUSP4	0.204052	undirected	7945262	8150076
RNVU1-6	CTTN	0.204055	undirected	7904715	7942204
TUBB1	ELOVL2-AS1	0.204064	undirected	8063716	8116904
HSPA8	RNA5SP31	0.204106	undirected	7952335	7969358
MEIS1	GP1BB	0.204125	undirected	8042356	8071268
RGS13	HIST2H2BE	0.204136	undirected	7908397	7919637
KIR3DX1	STRADB	0.204142	undirected	8031200	8047443
EIF4A2	HIST1H2AI	0.204184	undirected	8084708	8117580
HIST1H2AL	MPIG6B	0.204193	undirected	8117608	8179313
MMRN1	MPIG6B	0.204224	undirected	8096415	8179313
HIST2H3PS2	HIST1H3A	0.204241	undirected	7905085	8117330
SNORD101	RNU6-918P	0.204247	undirected	8122142	8156759
NUSAP1	HIST1H2AI	0.20425	undirected	7982889	8117580
PTCH2	NA	0.204256	undirected	7915612	8152333
RNVU1-3	PUM1	0.204265	undirected	7904963	7914324
RGS6	STRADB	0.204272	undirected	7975482	8047443
HIST1H1B	HIST1H3J	0.204303	undirected	8124527	8124537
AVPI1	LINC00328-2P	0.204317	undirected	7935521	8161375
RNVU1-6	SOCS1	0.204341	undirected	7904715	7999423
GAS5	HIST1H2AJ	0.204358	undirected	7922408	8124518
SLFN14	MEIS1	0.204361	undirected	8014259	8042356
RNVU1-15	SNORA37	0.204362	undirected	7919560	8023392
MMRN1	MFAP3L	0.204364	undirected	8096415	8103695
PDE3A	P2RY12	0.204366	undirected	7954293	8091530
GP1BA	ZMAT1	0.204371	undirected	8004024	8174119
MTND4P11	ABLIM3	0.204401	undirected	7917792	8109093
SNHG1	PVALB	0.204415	undirected	7948904	8075838
RNVU1-3	PUM1	0.204423	undirected	7904963	7914322
HIST2H3PS2	HIST1H2AB	0.204432	undirected	7919612	8124391
HIST1H2AI	ZMAT1	0.204439	undirected	8117580	8174119
GAS5	PVALB	0.204439	undirected	7922414	8075838
GAS5	HIST1H2AJ	0.204439	undirected	7922400	8124518
HBB	HIST1H2BG	0.204441	undirected	7946033	8124423
MYCT1	TREML1	0.204449	undirected	8122860	8126269
TAF13	LRRC75A-AS1	0.204463	undirected	7918284	8005202
HIST2H3PS2	HIST1H2AB	0.204481	undirected	7919614	8124391
SNORA37	EGF	0.204504	undirected	8023392	8096845
TFPI	HIST1H1A	0.204532	undirected	8057599	8124380
HSPA8	NA	0.204539	undirected	7952335	8161943
MTND2P19	HIST1H2BC	0.204543	undirected	8055486	8124406
HSPA8	NA	0.204549	undirected	7952335	8127423
PROS1	PTGS1	0.204592	undirected	8089015	8157650
HIST1H2AB	HIST1H2AJ	0.204606	undirected	8124391	8124518
GAS5	DUSP5	0.204618	undirected	7922412	7930413
IL10	MFSD2B	0.204622	undirected	7923907	8040522
RGS13	RN7SL472P	0.204626	undirected	7908397	7981333
RNA5SP31	MT-ND1	0.204683	undirected	7969358	8165656
OR2T8	CLEC1B	0.20469	undirected	7911233	7961102
PVALB	EIF4A2	0.204694	undirected	8075838	8084708
PVALB	PROS2P	0.204708	undirected	8075838	8089011
GYPA	MPIG6B	0.204715	undirected	8102998	8179313
ALOX12	RNU6-759P	0.204749	undirected	8004221	8065990
ZNF385D	HIST1H2BI	0.204768	undirected	8085774	8117429
SOCS1	ZNF385D	0.204777	undirected	7999423	8085774
MPL	KIR3DX1	0.204783	undirected	7900683	8031200
HIST1H2AB	DCAF12	0.204788	undirected	8124391	8160756
ASAP2	DUSP4	0.20479	undirected	8040113	8150076
RPL23	FABP5	0.204792	undirected	8014755	8147049
PDE3A	C15orf54	0.204824	undirected	7954293	7982593
GAS5	MMRN1	0.204828	undirected	7922408	8096415
HIST1H2BM	HIST1H3F	0.204858	undirected	8117594	8124437
AREG	SMAD1	0.204859	undirected	8095744	8097657
RNVU1-15	SNHG1	0.204866	undirected	7919556	7948908
ZFAS1	HIST1H2AH	0.204886	undirected	8063345	8117543
NA	NA	0.204901	undirected	8027437	8161943
SOCS1	TMEM40	0.204918	undirected	7999423	8085393
MTND4P11	CLC	0.204927	undirected	7917792	8036755
TMEM40	MT-ND1	0.204928	undirected	8085393	8165656
SNORA2A	ENC1	0.204951	undirected	7962827	8112615
NR4A2	SMAD1	0.204953	undirected	8055952	8097657
HIST2H2BE	BEND2	0.204955	undirected	7919637	8171545
NA	IGF2BP3	0.204963	undirected	8117583	8138566
HIST1H2AI	HIST1H3J	0.204966	undirected	8117580	8124537
DNM3	DCAF12	0.204967	undirected	7907370	8160756
SOCS3	HIST1H2AL	0.204976	undirected	8018864	8117608
HIST2H2BB	RPL23	0.205007	undirected	7919606	8014755
ENKUR	FAXDC2	0.205034	undirected	7932598	8115397
JUNB	PLAUR	0.205049	undirected	8026047	8037374
SNORA33	ABCB4	0.20508	undirected	8122144	8140752
RNU6-1101P	SNHG5	0.205101	undirected	8092886	8127989
SPARC	HIST1H2BG	0.205113	undirected	8115327	8124423
NA	HIST1H3A	0.205141	undirected	7928907	8117330
F5	SMC4	0.205182	undirected	7922174	8083737
HIST1H3F	PTGS1	0.205189	undirected	8124437	8157650
PDE3A	SLFN14	0.205189	undirected	7954293	8014259
CCDC175	RN7SL472P	0.20519	undirected	7979444	7981333
PUM1	NA	0.205208	undirected	7914324	7928907
HIST2H3PS2	HIST1H2AB	0.205225	undirected	7905085	8124391
NEXN	GP1BA	0.205233	undirected	7902495	8004024
CCDC175	ASAP2	0.205264	undirected	7979444	8040113
GP1BB	MMRN1	0.205266	undirected	8071268	8096415
BCL3	PIGA	0.205276	undirected	8029465	8171418
JAM3	STRADB	0.205276	undirected	7945262	8047443
KLF11	DYNLT1	0.205281	undirected	8040211	8130499
SPARC	ZMAT1	0.205295	undirected	8115327	8174119
RPL23	ITGA2B	0.205341	undirected	8014755	8016044
ITGA2B	MFAP3L	0.205343	undirected	8016044	8103695
RNU5E-1	RNA5SP31	0.205352	undirected	7897801	7969358
RNA5SP31	USP46	0.205365	undirected	7969358	8100328
HIST1H4D	HIST1H3J	0.205368	undirected	8124413	8124537
HBB	RPL23	0.205397	undirected	7946033	8014755
CD14	PAQR8	0.205425	undirected	8114612	8120215
CHN1	HIST1H2BI	0.205432	undirected	8056890	8117429
RGS6	ALOX12	0.205435	undirected	7975482	8004221
CLEC1B	HIST1H2AI	0.20544	undirected	7961102	8117580
TUBB1	EGF	0.205461	undirected	8063716	8096845
MEIS1	PRKAR2B	0.205463	undirected	8042356	8135378
SOCS3	RNU4ATAC	0.205474	undirected	8018864	8044961
ZNF385D	GUCY1B1	0.205478	undirected	8085774	8097973
RGS6	SLFN14	0.205483	undirected	7975482	8014259
DNM3	OR2T8	0.205492	undirected	7907370	7911233
MTND4P11	GP1BB	0.205509	undirected	7917792	8071268
SNORA37	HIST1H1A	0.205525	undirected	8023392	8124380
SNHG12	HIST1H3J	0.205549	undirected	7914212	8124537
SNHG1	PKHD1L1	0.205556	undirected	7948904	8147891
MTCYBP41	ELOVL2-AS1	0.205565	undirected	7950895	8116904
HGD	HIST1H2AM	0.205573	undirected	8089851	8124540
RNA5SP31	ALOX12	0.205583	undirected	7969358	8004221
RNVU1-6	TMEM40	0.205607	undirected	7904715	8085393
DDIT4	CD69	0.205636	undirected	7928308	7961075
PUM1	NA	0.205637	undirected	7914322	7928907
HIST1H2AH	HIST1H2BB	0.205641	undirected	8117543	8124394
IL10	LTBP1	0.205662	undirected	7923907	8041383
ITGA2B	SLC14A1	0.205696	undirected	8016044	8021081
GAS5	ABCB4	0.205697	undirected	7922408	8140752
RN7SL472P	ZNF385D	0.2057	undirected	7981333	8085774
HBB	LY6G6F	0.2057	undirected	7946033	8178063
HSPA8	SNORA37	0.205705	undirected	7952335	8023392
GYPA	PTGS1	0.205706	undirected	8102998	8157650
ENKUR	PF4	0.205718	undirected	7932598	8100966
SNHG12	HIST1H3A	0.205719	undirected	7914202	8117330
AKAP6	JUNB	0.205727	undirected	7973850	8026047
STRADB	KIR3DX1	0.205761	undirected	7901336	8031200
RNVU1-15	ELOVL7	0.205769	undirected	7919556	8112274
ITGA2B	PLOD2	0.205775	undirected	8016044	8091283
NUSAP1	HIST1H3A	0.205785	undirected	7982889	8117330
MPL	GAGE12J	0.205789	undirected	7900683	8167560
ENKUR	PDE5A	0.205804	undirected	7932598	8102532
HIST1H3H	HIST1H2BN	0.205838	undirected	8117589	8117600
GP1BB	HIST1H2AE	0.205853	undirected	8071268	8117408
JAM3	HIST1H2BH	0.205859	undirected	7945262	8117426
TFPI	HIST1H2BO	0.205907	undirected	8057599	8117614
OR2T8	HGD	0.205919	undirected	7911233	8093278
HSPA8	HIST1H2BO	0.205943	undirected	7952335	8117614
HIST1H2AB	HIST1H1B	0.205951	undirected	8124391	8124527
MIR516B2	LGALSL	0.205969	undirected	8031031	8042283
NA	HIST1H2BH	0.205969	undirected	7926983	8117426
HIST2H3PS2	HIST1H2BO	0.205982	undirected	7919612	8117614
MMD	FSTL1	0.206	undirected	8016832	8089835
RNVU1-15	SNORA80E	0.206033	undirected	7919556	7920873
ABLIM3	GAGE12J	0.206046	undirected	8109093	8167560
HIST1H2BM	HIST1H2AM	0.206123	undirected	8117594	8124540
SLFN14	STRADB	0.206177	undirected	8014259	8047443
RNVU1-6	NA	0.20619	undirected	7904715	8117583
OR2T8	MTND2P19	0.206208	undirected	7911233	8055486
AVPI1	LINC00328-2P	0.206228	undirected	7935521	8155453
EIF4A2	RNY4P17	0.206246	undirected	8084708	8098289
DNM3	HIST1H2BI	0.206256	undirected	7907370	8117429
CLU	ZMAT1	0.20627	undirected	8149927	8174119
HSPA2	ZNF385D	0.20627	undirected	7975076	8085774
DENND2C	TREML1	0.206274	undirected	7918768	8126269
PF4	ZMAT1	0.206282	undirected	8100966	8174119
SELP	HIST1H2AI	0.206287	undirected	7922200	8117580
FSTL1	PF4V1	0.206306	undirected	8089835	8095694
MMRN1	CLU	0.206317	undirected	8096415	8149927
ALOX12	HIST1H2BH	0.206323	undirected	8004221	8117426
DENND2C	SPARC	0.206334	undirected	7918768	8115327
GAS5	RGS6	0.206361	undirected	7922400	7975482
DUSP5	CMTM5	0.206394	undirected	7930413	7973403
SNHG12	MMRN1	0.206404	undirected	7914212	8096415
APOBEC3A	FAXDC2	0.206412	undirected	8073056	8115397
OLFM2	SMAD1	0.206418	undirected	8033818	8097657
RNVU1-15	SNHG1	0.206441	undirected	7919560	7948908
NEXN	PF4	0.206448	undirected	7902495	8100966
RGS13	HIST1H2AB	0.206454	undirected	7908397	8124391
PPBP	HIST1H2AL	0.206476	undirected	8100971	8117608
ZFAS1	RNU6-918P	0.2065	undirected	8063345	8156759
TIPARP	SMC4	0.206501	undirected	8083569	8083737
HIST1H2AI	HIST1H2AB	0.206504	undirected	8117580	8124391
KIR3DX1	LTBP1	0.206522	undirected	8031200	8041383
PDE5A	DAB2	0.206559	undirected	8102532	8111772
IGF2BP3	NFIB	0.206588	undirected	8138566	8160138
NA	HIST1H2AJ	0.206605	undirected	8119076	8124518
MPL	GP1BA	0.206615	undirected	7900683	8004024
RNVU1-15	TMEM40	0.206627	undirected	7919556	8085393
HBB	LY6G6F	0.206649	undirected	7946033	8118235
HIST2H4A	HIST1H2AB	0.206661	undirected	7905067	8124391
CCL4	RPL23	0.206675	undirected	8006602	8014755
P2RY12	LY6G6F	0.206686	undirected	8091530	8178063
RNY3P2	MMRN1	0.206693	undirected	7969091	8096415
HIST2H4A	HIST1H2AB	0.206705	undirected	7919627	8124391
RGS13	HIST1H3J	0.206735	undirected	7908397	8124537
MT-ND1	GNG11	0.206764	undirected	7896746	8134257
MT-ND1	MTND2P24	0.206811	undirected	7896746	8173156
RAB27B	MPIG6B	0.206814	undirected	8021301	8179313
VSTM1	AREG	0.206876	undirected	8039109	8095736
RPL23	HIST1H2AL	0.206894	undirected	8014755	8117608
PVALB	HIST1H3H	0.206953	undirected	8075838	8117589
NA	NA	0.206958	undirected	7899484	7922416
MMRN1	PF4	0.206963	undirected	8096415	8100966
STRADB	DUSP4	0.20699	undirected	8047443	8150076
EGF	PLK2	0.206993	undirected	8096845	8112202
RNVU1-15	PROS1	0.206993	undirected	7919560	8089015
SELP	ALOX12	0.207029	undirected	7922200	8004221
HIST2H3PS2	CLEC1B	0.207051	undirected	7919614	7961102
MT-ND2	MT-CO1	0.207083	undirected	8165658	8165663
FSTL1	HIST1H3F	0.207092	undirected	8089835	8124437
HSPA8	HIST1H2AI	0.207097	undirected	7952335	8117580
RGS6	GYPA	0.207111	undirected	7975482	8102998
AVPI1	EIF5	0.207111	undirected	7935521	7977075
HBB	PLOD2	0.207114	undirected	7946033	8091283
SELP	HSPA8	0.207123	undirected	7922200	7952335
SNHG12	PKHD1L1	0.207134	undirected	7914212	8147891
SNHG1	LTBP1	0.207135	undirected	7948900	8041383
FABP5	HIST1H2AE	0.207141	undirected	7948420	8117408
SNHG12	HIST1H2BH	0.20715	undirected	7914214	8117426
FAXDC2	ZMAT1	0.20716	undirected	8115397	8174119
SNHG12	HIST1H2BH	0.207171	undirected	7914202	8117426
SNORA37	NFIB	0.207199	undirected	8023392	8160138
MPL	DUSP4	0.207264	undirected	7900683	8150076
SNORA37	STRADB	0.207341	undirected	8023392	8047443
FAXDC2	PKHD1L1	0.207347	undirected	8115397	8147891
RNVU1-6	MPIG6B	0.207359	undirected	7904715	8179313
HIST1H3A	NA	0.207367	undirected	8117330	8119076
HIST1H2BI	HIST1H2BM	0.207377	undirected	8117429	8117594
ACKR3	SMAD1	0.207377	undirected	8049471	8097657
CCDC175	DAB2	0.207387	undirected	7979444	8111772
RAB27B	PROS2P	0.207388	undirected	8021301	8089011
DNM3	RNVU1-15	0.207397	undirected	7907370	7919560
P2RY12	LY6G6F	0.207411	undirected	8091530	8118235
NR4A2	SYAP1	0.207435	undirected	8055952	8166219
GAS5	MEIS1	0.207452	undirected	7922400	8042356
PF4V1	IGF2BP3	0.207485	undirected	8095694	8138566
LRRC75A-AS1	SMC4	0.207489	undirected	8005202	8083737
PCDH9	EIF5	0.207574	undirected	7971922	7977075
GAS5	HIST1H2AM	0.207581	undirected	7922400	8124540
PRKAR2B	NFIB	0.207587	undirected	8135378	8160138
HIST1H2AL	MPIG6B	0.207615	undirected	8117608	8118249
DNM3	PLK2	0.207626	undirected	7907370	8112202
APOBEC3A	PF4	0.207641	undirected	8073056	8100966
HBA2	PLOD2	0.207672	undirected	7991762	8091283
SOCS3	EGF	0.207677	undirected	8018864	8096845
ITGA2B	CLC	0.207685	undirected	8016044	8036755
CMTM5	CAVIN2	0.207695	undirected	7973403	8057797
EIF5	SNHG5	0.207697	undirected	7977075	8127989
TREML1	DUSP4	0.207699	undirected	8126269	8150076
ACKR3	SYAP1	0.20771	undirected	8049471	8166219
HIST2H3PS2	FAXDC2	0.207716	undirected	7919614	8115397
OR2T8	HGD	0.207735	undirected	7911233	8089851
C15orf54	P2RY12	0.207739	undirected	7982593	8091530
THBS1	KLF11	0.207753	undirected	7982597	8040211
HBA2	PLOD2	0.207756	undirected	7991766	8091283
MTND4P12	NA	0.20776	undirected	8114211	8152333
NRGN	FSTL1	0.207781	undirected	7944876	8089835
LGALSL	ZNF385D	0.207803	undirected	8042283	8085774
MT-CO1	MT-ND2	0.207806	undirected	7896750	8165658
OSER1	DCTN6	0.20782	undirected	8066402	8145660
NA	PKHD1L1	0.207844	undirected	7922416	8147891
OR2T8	NA	0.207852	undirected	7911233	8117583
CLEC1B	DKC1	0.207856	undirected	7961102	8170990
PF4V1	EGF	0.207903	undirected	8095694	8096845
RNVU1-15	ZFAS1	0.207926	undirected	7919556	8063345
PROS1	HIST1H2BN	0.207943	undirected	8089015	8117600
HIST1H2BO	HIST1H3B	0.207951	undirected	8117614	8124388
LTBP1	NCKAP1	0.207952	undirected	8041383	8057517
SNHG1	HIST1H2AM	0.207962	undirected	7948908	8124540
DUSP5	ITGA2B	0.207975	undirected	7930413	8016044
PVALB	PLK2	0.207982	undirected	8075838	8112202
NRGN	HIST1H2AE	0.207992	undirected	7944876	8117408
NA	HIST1H2BG	0.208002	undirected	7959572	8124423
GAS5	RPL23	0.20802	undirected	7922414	8014755
SELP	HIST1H2BN	0.208041	undirected	7922200	8117600
ELOVL2-AS1	DKC1	0.208069	undirected	8116904	8170990
PF4V1	HIST1H2BO	0.208089	undirected	8095694	8117614
RNVU1-15	SNORA80E	0.2081	undirected	7919560	7920873
VSTM1	AREG	0.20816	undirected	8039109	8095744
FAXDC2	HIST1H2AB	0.208179	undirected	8115397	8124391
HIST1H3H	HIST1H2BM	0.208208	undirected	8117589	8117594
PDE3A	MPIG6B	0.208211	undirected	7954293	8178074
RNVU1-15	ZFAS1	0.208226	undirected	7919560	8063345
AKAP6	AREG	0.208252	undirected	7973850	8095744
GAS5	MIR516B2	0.20827	undirected	7922400	8031031
NEXN	SNHG1	0.208288	undirected	7902495	7948904
HIST2H3PS2	ITGA2B	0.208296	undirected	7919612	8016044
PVALB	LINC00328-2P	0.208299	undirected	8075838	8155453
HSPA8	DDX11L16	0.208315	undirected	7952335	8054758
PLOD2	PDE5A	0.208343	undirected	8091283	8102532
RN7SL472P	HIST1H2BB	0.208351	undirected	7981333	8124394
MPL	ITGA2B	0.208353	undirected	7900683	8016044
RNA5SP31	DCTN6	0.208371	undirected	7969358	8145660
RNVU1-15	SELP	0.208404	undirected	7919560	7922200
NA	DKC1	0.208406	undirected	8161943	8170990
RN7SL472P	ELOVL7	0.208437	undirected	7981333	8112274
SNHG12	NA	0.20848	undirected	7914214	7922416
RGS1	PROS1	0.208498	undirected	7908388	8089015
HIST1H3J	DCAF12	0.208506	undirected	8124537	8160756
DNM3	HIST1H2AB	0.208507	undirected	7907370	8124391
CCDC175	PPBP	0.20851	undirected	7979444	8100971
CCDC175	C15orf54	0.208514	undirected	7979444	7982593
RNVU1-15	CTTN	0.208534	undirected	7919556	7942204
MPL	FABP5	0.208581	undirected	7900683	8147049
AKAP6	PLAUR	0.208649	undirected	7973850	8037374
HIST2H3PS2	CLEC1B	0.20867	undirected	7905085	7961102
MFSD2B	MMRN1	0.208722	undirected	8040522	8096415
IL10	CLC	0.208777	undirected	7923907	8036755
SNORA2A	HIST1H2AI	0.208785	undirected	7962827	8117580
ACKR3	AREG	0.208789	undirected	8049471	8095744
RNVU1-6	HIST2H3PS2	0.208798	undirected	7904715	7919614
NEXN	HIST1H2BH	0.208813	undirected	7902495	8117426
DUSP5	BCL3	0.208822	undirected	7930413	8029465
GAS5	FABP5	0.208836	undirected	7922412	7948420
CMTM5	SH3BGRL2	0.208871	undirected	7973403	8120833
SNORD101	SNHG5	0.208877	undirected	8122142	8127987
BCL3	RNU6-407P	0.208882	undirected	8029465	8065853
RAB27B	PLK2	0.208889	undirected	8021301	8112202
HSPA8	HSPA2	0.208892	undirected	7952335	7975076
GYPA	CA2	0.208897	undirected	8102998	8147132
RNVU1-15	VTRNA1-3	0.208966	undirected	7919560	8108631
DNM3	MMRN1	0.208967	undirected	7907370	8096415
PRICKLE1	RNU6-82P	0.20897	undirected	7962375	7968295
RNVU1-6	MTND4P11	0.208981	undirected	7904715	7917792
HIST2H2BE	MMRN1	0.208985	undirected	7919637	8096415
TFPI	LY6G6F	0.20899	undirected	8057599	8118235
TFPI	LY6G6F	0.209002	undirected	8057599	8178063
ASAP2	STRADB	0.209002	undirected	8040113	8047443
CLEC1B	CMTM5	0.209011	undirected	7961102	7973403
F5	CD69	0.209021	undirected	7922174	7961075
PLOD2	MPIG6B	0.209039	undirected	8091283	8178074
SNORA2A	PVALB	0.209048	undirected	7962827	8075838
EIF5	USP46	0.209052	undirected	7977075	8100328
HIST1H3H	HIST1H1A	0.209057	undirected	8117589	8124380
RNVU1-15	CAVIN2	0.20906	undirected	7919556	8057797
HIST1H2BI	SNORA33	0.209061	undirected	8117429	8122144
SNHG1	HIST1H2BB	0.209072	undirected	7948900	8124394
SLC14A1	ABLIM3	0.209074	undirected	8021081	8109093
STRADB	JAM3	0.209076	undirected	7901336	7945262
RNVU1-15	HIST1H2BO	0.209102	undirected	7919556	8117614
HIST1H2BI	DUSP4	0.209113	undirected	8117429	8150076
BCL3	TNFAIP3	0.20914	undirected	8029465	8122265
MT-ND1	PF4	0.209176	undirected	7896746	8100966
PF4V1	DAB2	0.209177	undirected	8095694	8111772
CLEC1B	ALOX12	0.209177	undirected	7961102	8004221
PROS1	TREML1	0.209198	undirected	8089015	8126269
CLEC1B	SLC14A1	0.209296	undirected	7961102	8021081
GAS5	NA	0.209301	undirected	7922410	8174226
DAB2	HIST1H2AB	0.209302	undirected	8111772	8124391
NEXN	CLEC1B	0.209362	undirected	7902495	7961102
MPL	GAS5	0.209384	undirected	7900683	7922412
LTBP1	ZMAT1	0.209392	undirected	8041383	8174119
PPBP	ELOVL2-AS1	0.209424	undirected	8100971	8116904
CCDC175	SPARC	0.209456	undirected	7979444	8115327
KIR3DX1	MFSD2B	0.209473	undirected	8031200	8040522
ITGA2B	KIR3DX1	0.209482	undirected	8016044	8031200
HIST2H3PS2	ITGA2B	0.209517	undirected	7919614	8016044
RN7SL472P	HIST1H2AL	0.209517	undirected	7981333	8117608
RNVU1-6	HIST2H3PS2	0.209548	undirected	7904715	7905085
SNORA37	CAVIN2	0.209551	undirected	8023392	8057797
ITGA2B	PKHD1L1	0.209562	undirected	8016044	8147891
NA	DUSP4	0.209584	undirected	8117583	8150076
NA	AREG	0.209623	undirected	7925318	8095744
SLC7A5	KLF11	0.209631	undirected	8003298	8040211
NEXN	CTTN	0.209654	undirected	7902495	7942204
ZNF805	OSER1	0.209656	undirected	8031712	8066402
PLOD2	HIST1H2AB	0.209663	undirected	8091283	8124391
ITGA2B	MT-TQ	0.20968	undirected	8016044	8165694
PDE5A	GYPA	0.209684	undirected	8102532	8102998
SPARC	HIST1H2AB	0.209689	undirected	8115327	8124391
CMTM5	MMRN1	0.209694	undirected	7973403	8096415
STRADB	DUSP4	0.209697	undirected	7901336	8150076
SELP	HIST1H2BH	0.209708	undirected	7922200	8117426
NR4A2	ENC1	0.209725	undirected	8055952	8112615
CCDC175	NA	0.209783	undirected	7979444	8117583
MT-TQ	ITGA2B	0.209795	undirected	7911335	8016044
DENND2C	DAB2	0.209802	undirected	7918768	8111772
RPL13A	NA	0.209802	undirected	8030364	8109303
F5	SHTN1	0.209811	undirected	7922174	7936529
F5	CES1P1	0.209825	undirected	7922174	8001457
FSTL1	HIST1H2BH	0.209843	undirected	8089835	8117426
TFPI	MYCT1	0.209858	undirected	8057599	8122860
RNU6-82P	PCDH9	0.209873	undirected	7968295	7971922
SNHG1	NA	0.209873	undirected	7948904	8174226
HIST2H3PS2	FAXDC2	0.209931	undirected	7905085	8115397
GAS5	ALOX12	0.209943	undirected	7922414	8004221
GAS5	PROS2P	0.20999	undirected	7922400	8089011
PVALB	SH3BGRL2	0.209993	undirected	8075838	8120833
OSM	USP46	0.209995	undirected	8075316	8100328
JAM3	RAB27B	0.210003	undirected	7945262	8021301
DUSP5	HIST1H2BN	0.210048	undirected	7930413	8117600
HIST2H3PS2	HIST1H2BB	0.210063	undirected	7919612	8124394
HIST1H2AJ	SNHG5	0.210066	undirected	8124518	8127987
SUMO1P3	RPL13A	0.210078	undirected	7906574	8030364
CTLA4	EIF4A2	0.210104	undirected	8047692	8084708
SMC4	SYAP1	0.210133	undirected	8083737	8166219
SNHG12	SNORD101	0.21014	undirected	7914212	8122142
ZNF385D	CLU	0.210144	undirected	8085774	8149927
DNM3	RNVU1-15	0.210164	undirected	7907370	7919556
TFPI	DKC1	0.210172	undirected	8057599	8170990
NA	RPL23	0.210189	undirected	7899484	8014755
SNORA80E	HSPA8	0.21019	undirected	7920873	7952335
NEXN	TREML1	0.210206	undirected	7902495	8126269
RNVU1-6	ASAP2	0.210219	undirected	7904715	8040113
SNORA80E	HIST1H2BB	0.210232	undirected	7920873	8124394
MT-ND1	HIST1H3H	0.21031	undirected	7896746	8117589
RNVU1-6	JAM3	0.21032	undirected	7904715	7945262
RGS6	SPARC	0.210325	undirected	7975482	8115327
NA	HIST1H2AH	0.210327	undirected	7899484	8117543
MPL	SELP	0.210335	undirected	7900683	7922200
SNHG12	GAS5	0.210336	undirected	7914202	7922400
SOCS3	EYS	0.210338	undirected	8018864	8127396
SNHG1	ZFAS1	0.210345	undirected	7948910	8063345
MMRN1	PPBP	0.210353	undirected	8096415	8100971
APOBEC3A	SPARC	0.210359	undirected	8073056	8115327
SOCS3	LY6G6F	0.210419	undirected	8018864	8118235
BCL3	SMAD1	0.210466	undirected	8029465	8097657
NCKAP1	HIST1H2BI	0.210482	undirected	8057517	8117429
MT-ND1	PTGS1	0.21049	undirected	7896746	8157650
LRRC75A-AS1	TBRG4	0.210497	undirected	8005202	8139482
SELP	DCAF12	0.210498	undirected	7922200	8160756
RPL23	ABLIM3	0.210514	undirected	8014755	8109093
HIST1H2AE	HIST1H3J	0.210517	undirected	8117408	8124537
MPL	RN7SL472P	0.210551	undirected	7900683	7981333
CTTN	CMTM5	0.210563	undirected	7942204	7973403
STRADB	HIST1H3J	0.210581	undirected	8047443	8124537
SOCS1	VTRNA1-3	0.210608	undirected	7999423	8108631
CCL4	HIST1H2BH	0.210619	undirected	8006602	8117426
PLK2	MPIG6B	0.210627	undirected	8112202	8178074
SOCS3	LY6G6F	0.210641	undirected	8018864	8178063
SLC14A1	IGF2BP3	0.210665	undirected	8021081	8138566
MMRN1	SNHG5	0.210667	undirected	8096415	8127989
EIF5	LRRC75A-AS1	0.210668	undirected	7977075	8005202
STRADB	TREML1	0.210674	undirected	8047443	8126269
RNVU1-15	RNU6-759P	0.210678	undirected	7919560	8065990
PKHD1L1	MPIG6B	0.210694	undirected	8147891	8179313
MIR516B2	HIST1H2AE	0.210698	undirected	8031031	8117408
SOCS3	DUSP4	0.210713	undirected	8018864	8150076
STRADB	SNORA37	0.210717	undirected	7901336	8023392
CD69	CD14	0.210734	undirected	7961075	8114612
RNU5E-1	HIST1H3A	0.210782	undirected	7897801	8117330
SOCS1	HIST1H2BN	0.210786	undirected	7999423	8117600
RNY3P2	HIST1H2BH	0.210789	undirected	7969091	8117426
MTND4P11	ITGA2B	0.210847	undirected	7917792	8016044
RHOBTB1	SLFN14	0.210851	undirected	7933821	8014259
GYPA	HIST1H2BB	0.210855	undirected	8102998	8124394
NA	HIST1H3J	0.211033	undirected	7922416	8124537
MMRN1	HIST1H3H	0.211048	undirected	8096415	8117589
NA	HIST1H2AE	0.21108	undirected	7926983	8117408
ALOX12	HIST1H2BJ	0.211118	undirected	8004221	8124484
GAS5	GAGE12J	0.211147	undirected	7922412	8167560
HIST1H2AE	HIST1H1B	0.211149	undirected	8117408	8124527
GAS5	RNU6-918P	0.21115	undirected	7922400	8156759
TUBB1	PF4V1	0.21117	undirected	8063716	8095694
SNORA2A	ZMAT1	0.211172	undirected	7962827	8174119
HIST1H1A	HIST1H2BB	0.211205	undirected	8124380	8124394
NEXN	NA	0.211241	undirected	7902495	8117583
USP46	HIST1H2AJ	0.211286	undirected	8100328	8124518
SNORA33	HIST1H2AM	0.21131	undirected	8122144	8124540
ASAP2	NA	0.21131	undirected	8040113	8117583
HIST1H2AB	CLU	0.211311	undirected	8124391	8149927
RGS6	PLOD2	0.211319	undirected	7975482	8091283
NA	HIST1H1A	0.211321	undirected	8117583	8124380
RPL23	SNORA33	0.211324	undirected	8014755	8122144
PKHD1L1	DCAF12	0.21133	undirected	8147891	8160756
TAF13	RNA5SP31	0.211336	undirected	7918284	7969358
HSPA8	LY6G6F	0.21134	undirected	7952335	8178063
PLK2	HIST1H2BG	0.211365	undirected	8112202	8124423
NEXN	RNU6-918P	0.211406	undirected	7902495	8156759
TUBB1	GYPA	0.211406	undirected	8063716	8102998
SPARC	HIST1H3B	0.211432	undirected	8115327	8124388
RNU5E-1	MTND4P12	0.211466	undirected	7897801	8114211
LY6G6F	HIST1H2AB	0.211466	undirected	8118235	8124391
SNHG1	CTLA4	0.211468	undirected	7948904	8047692
HIST1H2AB	LY6G6F	0.211526	undirected	8124391	8178063
NEXN	NA	0.211548	undirected	7902495	8119076
SPARC	ELOVL2-AS1	0.211563	undirected	8115327	8116904
GAS5	SNHG1	0.211596	undirected	7922406	7948902
ACKR3	DNAJC28	0.21162	undirected	8049471	8070097
SELP	MT-TQ	0.211638	undirected	7922200	8165694
GP1BA	HIST1H3F	0.211639	undirected	8004024	8124437
DDIT4	ACKR3	0.211642	undirected	7928308	8049471
SOCS3	LGALSL	0.211673	undirected	8018864	8042283
PROS1	MPIG6B	0.211683	undirected	8089015	8178074
HIST2H2BB	CKS2	0.211692	undirected	7919584	8156290
ITGA2B	ZNF385D	0.21171	undirected	8016044	8085774
HIST2H3PS2	ITGA2B	0.211744	undirected	7905085	8016044
FAXDC2	HIST1H2BN	0.211744	undirected	8115397	8117600
F5	SLC7A5	0.211756	undirected	7922174	8003298
SELP	DDX11L16	0.211767	undirected	7922200	8054758
NA	HIST1H2BB	0.211798	undirected	7922416	8124394
SLC7A5	PAQR8	0.211802	undirected	8003298	8120215
RGS6	MEIS1	0.211806	undirected	7975482	8042356
MT-TQ	SELP	0.211829	undirected	7911335	7922200
MT-ND2	PUM1	0.211879	undirected	7896748	7914322
CLEC1B	HIST1H3F	0.211882	undirected	7961102	8124437
ZNF385D	FAXDC2	0.211886	undirected	8085774	8115397
HSPA8	LY6G6F	0.211895	undirected	7952335	8118235
HIST1H2AL	HIST1H2AM	0.211938	undirected	8117608	8124540
HIST2H2BE	HIST1H2AI	0.211952	undirected	7919637	8117580
SNHG12	CCDC175	0.211953	undirected	7914212	7979444
SELP	SNCA	0.211974	undirected	7922200	8101762
SNHG12	HIST1H2AJ	0.211976	undirected	7914202	8124518
PPBP	HIST1H2BN	0.21198	undirected	8100971	8117600
RNVU1-15	NCKAP1	0.211989	undirected	7919560	8057517
AKAP6	AREG	0.211994	undirected	7973850	8095736
RNA5SP31	HIST1H2AI	0.211997	undirected	7969358	8117580
CLEC1B	GYPA	0.212002	undirected	7961102	8102998
SNORA2A	LRRC75A-AS1	0.212014	undirected	7962827	8005202
MMRN1	HIST1H2AJ	0.212019	undirected	8096415	8124518
SNORA37	MPIG6B	0.212049	undirected	8023392	8179313
RNVU1-6	HIST1H2AL	0.212056	undirected	7904715	8117608
PLK2	HIST1H2AB	0.212083	undirected	8112202	8124391
GAS5	GNG11	0.212084	undirected	7922400	8134257
STRADB	FAXDC2	0.212088	undirected	8047443	8115397
CD69	OLFM2	0.212089	undirected	7961075	8033818
RGS18	GYPA	0.21209	undirected	7908376	8102998
SNORA2A	SOCS3	0.212092	undirected	7962827	8018864
MEIS1	ZNF385D	0.212095	undirected	8042356	8085774
DDIT4	SLC7A5	0.212125	undirected	7928308	8003298
SOCS1	GP1BA	0.212139	undirected	7999423	8004024
GAS5	HGD	0.212146	undirected	7922414	8093278
HBD	NA	0.212153	undirected	7946041	7959572
HIST1H2BN	HIST1H3B	0.212159	undirected	8117600	8124388
HIST2H3PS2	HIST1H3H	0.21217	undirected	7919612	8117589
ABLIM3	HIST1H2AL	0.212189	undirected	8109093	8117608
GAS5	HIST1H3A	0.2122	undirected	7922400	8117330
PROS2P	MPIG6B	0.212222	undirected	8089011	8179313
HIST1H2BJ	MT-TQ	0.212239	undirected	8124484	8165694
NA	LINC00328-2P	0.212262	undirected	7928907	8161375
DDX11L16	ELOVL7	0.212272	undirected	8054758	8112274
SNHG1	MTND2P19	0.212275	undirected	7948902	8055486
RNU5E-1	NA	0.212299	undirected	7897801	8127423
PF4	NFIB	0.212386	undirected	8100966	8160138
RNVU1-15	SNORA37	0.212396	undirected	7919556	8023392
GP1BB	TREML1	0.212403	undirected	8071268	8126269
PLK2	MYCT1	0.212447	undirected	8112202	8122860
MT-TQ	HIST1H2BJ	0.212491	undirected	7911335	8124484
NEXN	MIR516B2	0.212496	undirected	7902495	8031031
MPL	GAS5	0.212516	undirected	7900683	7922400
MT-ND2	PUM1	0.212551	undirected	7896748	7914324
RNVU1-15	MND1	0.212602	undirected	7919556	8097857
JAM3	PKHD1L1	0.212613	undirected	7945262	8147891
RNU5E-1	HGD	0.212619	undirected	7897801	8089851
HIST1H2AL	HIST1H1B	0.212657	undirected	8117608	8124527
NA	LY6G6F	0.212657	undirected	8117583	8178063
ZFAS1	HIST1H2AM	0.212671	undirected	8063345	8124540
MT-ND1	MTND2P24	0.212686	undirected	8165656	8173156
MPL	SOCS1	0.212688	undirected	7900683	7999423
RGS6	C15orf54	0.212705	undirected	7975482	7982593
HIST1H2BI	HIST1H2AI	0.212781	undirected	8117429	8117580
ASAP2	PKHD1L1	0.212811	undirected	8040113	8147891
FAXDC2	MT-ND1	0.212876	undirected	8115397	8165656
MFSD2B	PLK2	0.212895	undirected	8040522	8112202
RNU4ATAC	ZMAT1	0.212917	undirected	8044961	8174119
PF4	PKHD1L1	0.21292	undirected	8100966	8147891
CTTN	HSPA2	0.212922	undirected	7942204	7975076
OR2T8	TFPI	0.212929	undirected	7911233	8057599
CLEC1B	SOCS1	0.212934	undirected	7961102	7999423
GAS5	FSTL1	0.212957	undirected	7922412	8089835
RNU5E-1	HGD	0.212988	undirected	7897801	8093278
RGS13	HIST1H3F	0.212995	undirected	7908397	8124437
RNA5SP31	EIF5	0.212996	undirected	7969358	7977075
C15orf54	TREML1	0.212996	undirected	7982593	8126269
SNHG1	HIST1H2AE	0.213036	undirected	7948900	8117408
DDIT4	THBS1	0.213037	undirected	7928308	7982597
GP1BB	ELOVL7	0.213048	undirected	8071268	8112274
NA	CD14	0.213069	undirected	7925318	8114612
RNVU1-6	MPIG6B	0.213077	undirected	7904715	8118249
PDE5A	BEND2	0.213081	undirected	8102532	8171545
PDE3A	BMP6	0.213095	undirected	7954293	8116818
HIST2H2BB	STRADB	0.213101	undirected	7919584	8047443
EIF5	NSA2	0.21311	undirected	7977075	8106278
RNVU1-19	PUM1	0.213135	undirected	7904967	7914322
NEXN	HIST1H2BJ	0.213136	undirected	7902495	8124484
GAS5	NA	0.213215	undirected	7922400	8003859
CTTN	C15orf54	0.21328	undirected	7942204	7982593
HIST1H2AI	HIST1H3H	0.213288	undirected	8117580	8117589
GAS5	CTLA4	0.213296	undirected	7922414	8047692
GP1BB	IGF2BP3	0.213298	undirected	8071268	8138566
NA	LY6G6F	0.213304	undirected	8117583	8118235
DNM3	PF4V1	0.213322	undirected	7907370	8095694
DNM3	HSPA8	0.21333	undirected	7907370	7952335
CTTN	NA	0.213338	undirected	7942204	8117583
RNVU1-15	RNU6-759P	0.213378	undirected	7919556	8065990
CCDC175	HIST1H2BO	0.213381	undirected	7979444	8117614
C15orf54	GUCY1B1	0.213405	undirected	7982593	8097973
USP46	HIST1H2AE	0.213421	undirected	8100328	8117408
HBB	NA	0.213452	undirected	7946033	7959572
NA	HIST1H2BC	0.213477	undirected	8117583	8124406
GAS5	NA	0.213484	undirected	7922406	8174226
HIST1H3H	HIST1H2BO	0.213492	undirected	8117589	8117614
MEIS1	HIST1H2BG	0.213505	undirected	8042356	8124423
CES1P1	AREG	0.213506	undirected	8001457	8095736
JAM3	PROS2P	0.213543	undirected	7945262	8089011
CTTN	ALOX12	0.213549	undirected	7942204	8004221
PVALB	ELOVL7	0.213608	undirected	8075838	8112274
TFPI	DUSP4	0.213609	undirected	8057599	8150076
DENND2C	HIST1H2AB	0.213614	undirected	7918768	8124391
RNVU1-15	VTRNA1-3	0.213648	undirected	7919556	8108631
GP1BA	MMRN1	0.213654	undirected	8004024	8096415
HIST2H4A	HIST1H2BJ	0.21366	undirected	7905067	8124484
NEXN	MEIS1	0.213671	undirected	7902495	8042356
MFAP3L	HIST1H2BG	0.213709	undirected	8103695	8124423
HIST2H2BE	DUSP4	0.213717	undirected	7919637	8150076
GAS5	HGD	0.213743	undirected	7922414	8089851
MTCYBP41	HGD	0.213768	undirected	7950895	8093278
DAB2	HIST1H2BB	0.213772	undirected	8111772	8124394
PF4V1	BMP6	0.213782	undirected	8095694	8116818
RNVU1-19	PUM1	0.21381	undirected	7904967	7914324
ACKR3	DYNLT1	0.213812	undirected	8049471	8130499
F5	THBS1	0.213835	undirected	7922174	7982597
LRRC75A-AS1	NR4A2	0.21386	undirected	8005202	8055952
RNY3P2	RPL23	0.213865	undirected	7969091	8014755
JAM3	MMRN1	0.21387	undirected	7945262	8096415
HIST2H4A	HIST1H2BJ	0.213891	undirected	7919627	8124484
RGS6	PRKAR2B	0.213904	undirected	7975482	8135378
PDE3A	MYCT1	0.213908	undirected	7954293	8122860
MEIS1	EGF	0.213933	undirected	8042356	8096845
GAS5	NA	0.213953	undirected	7922414	8174226
P2RY12	NA	0.213966	undirected	8091530	8117583
RNA5SP31	LRRC75A-AS1	0.213981	undirected	7969358	8005202
MEIS1	HIST1H2BH	0.213982	undirected	8042356	8117426
HIST2H2BB	HIST2H4A	0.214013	undirected	7919584	7919627
SLC14A1	GNG11	0.21404	undirected	8021081	8134257
MPL	HBA2	0.214064	undirected	7900683	7991762
ASAP2	PLK2	0.214082	undirected	8040113	8112202
RNU5E-1	NA	0.214092	undirected	7897801	7928907
MPL	HBA2	0.214102	undirected	7900683	7991766
CCDC175	HIST1H2BH	0.214135	undirected	7979444	8117426
HIST1H3B	HIST1H3F	0.214139	undirected	8124388	8124437
HIST2H4A	HIST2H2BB	0.214144	undirected	7905067	7919584
RGS13	HSPA8	0.214149	undirected	7908397	7952335
AREG	TNFAIP3	0.214164	undirected	8095744	8122265
SELP	HIST1H2AL	0.214169	undirected	7922200	8117608
HIST1H2BI	HIST1H4D	0.214189	undirected	8117429	8124413
CAVIN2	MT-TQ	0.214193	undirected	8057797	8165694
PROS2P	MFAP3L	0.214206	undirected	8089011	8103695
OR2T8	SPARC	0.214219	undirected	7911233	8115327
GNG11	MT-ND1	0.214239	undirected	8134257	8165656
CCDC175	TFPI	0.214285	undirected	7979444	8057599
SNHG1	CCL4	0.214292	undirected	7948908	8006602
SOCS1	ABLIM3	0.214316	undirected	7999423	8109093
GAS5	HIST1H2AE	0.214327	undirected	7922406	8117408
PDE3A	CA2	0.21433	undirected	7954293	8147132
JAM3	SOCS3	0.214355	undirected	7945262	8018864
HSPA8	HIST1H3H	0.214392	undirected	7952335	8117589
CD69	DYNLT1	0.2144	undirected	7961075	8130499
PTGS1	ZMAT1	0.214404	undirected	8157650	8174119
MT-TQ	CAVIN2	0.214407	undirected	7911335	8057797
GUCY1B1	HIST1H2BG	0.214419	undirected	8097973	8124423
HIST1H2BH	HIST1H1A	0.214426	undirected	8117426	8124380
GAS5	HIST1H3H	0.214437	undirected	7922400	8117589
SNHG1	MMRN1	0.214442	undirected	7948904	8096415
HIST1H2BO	GAGE12J	0.214443	undirected	8117614	8167560
RNY3P2	HIST1H3A	0.214449	undirected	7969091	8117330
NA	SNORD101	0.214464	undirected	8117583	8122142
RNU5E-1	LINC00328-2P	0.214479	undirected	7897801	8161375
RGS13	MMRN1	0.214479	undirected	7908397	8096415
GP1BA	PKHD1L1	0.214498	undirected	8004024	8147891
RHOBTB1	PDE3A	0.2145	undirected	7933821	7954293
TFPI	PKHD1L1	0.214563	undirected	8057599	8147891
HSPA8	HIST1H2BJ	0.21457	undirected	7952335	8124484
ENKUR	HIST1H3H	0.214591	undirected	7932598	8117589
HIST1H3H	DUSP4	0.214605	undirected	8117589	8150076
HIST2H2BE	HIST1H1B	0.214635	undirected	7919637	8124527
OR2T8	ELOVL7	0.214648	undirected	7911233	8112274
GYPA	HIST1H2BG	0.214655	undirected	8102998	8124423
SMC4	ENC1	0.214664	undirected	8083737	8112615
GAS5	ANKRD36C	0.214693	undirected	7922400	8053797
HIST2H4A	KIR3DX1	0.214703	undirected	7905067	8031200
FSTL1	RNU6-918P	0.214717	undirected	8089835	8156759
CLEC1B	MT-ND1	0.214733	undirected	7961102	8165656
HSPA2	PROS2P	0.214836	undirected	7975076	8089011
SNORA37	MEIS1	0.214905	undirected	8023392	8042356
KIR3DX1	HIST1H2BB	0.214917	undirected	8031200	8124394
RNVU1-15	SELP	0.214932	undirected	7919556	7922200
ALOX12	SH3BGRL2	0.214936	undirected	8004221	8120833
HIST1H2AE	NFIB	0.214937	undirected	8117408	8160138
HIST1H3H	HIST1H2BB	0.214964	undirected	8117589	8124394
RNVU1-15	CCL4	0.214969	undirected	7919560	8006602
NA	LINC00328-2P	0.21497	undirected	7928907	8155453
HIST2H4A	KIR3DX1	0.214977	undirected	7919627	8031200
PER1	JUNB	0.215002	undirected	8012349	8026047
GAS5	MFSD2B	0.215034	undirected	7922412	8040522
RNA5SP31	NUSAP1	0.215065	undirected	7969358	7982889
RNVU1-6	CLU	0.215076	undirected	7904715	8149927
NEXN	RAB27B	0.215109	undirected	7902495	8021301
SNORA37	MPIG6B	0.21513	undirected	8023392	8178074
MEIS1	MPIG6B	0.215152	undirected	8042356	8118249
MPL	CAVIN2	0.215191	undirected	7900683	8057797
RGS1	SOCS1	0.215199	undirected	7908388	7999423
MTND4P12	DKC1	0.215202	undirected	8114211	8170990
RNY3P2	RNU6-918P	0.215214	undirected	7969091	8156759
NEXN	MFAP3L	0.215224	undirected	7902495	8103695
MFAP3L	BEND2	0.215229	undirected	8103695	8171545
IL10	DUSP4	0.215266	undirected	7923907	8150076
SNHG1	RNY3P2	0.215299	undirected	7948910	7969091
SNORA2A	MTND4P12	0.21531	undirected	7962827	8114211
SNORA2A	HIST1H2BN	0.21531	undirected	7962827	8117600
PROS2P	HIST1H2BI	0.215313	undirected	8089011	8117429
RNVU1-19	DNAJC28	0.215315	undirected	7904967	8070097
RNVU1-15	PROS1	0.215326	undirected	7919556	8089015
MMRN1	SH3BGRL2	0.215363	undirected	8096415	8120833
NA	ANKRD36C	0.21537	undirected	7922416	8053797
HBB	HIST1H2BI	0.215375	undirected	7946033	8117429
SNORA37	ASAP2	0.215391	undirected	8023392	8040113
PDE3A	KIR3DX1	0.215393	undirected	7954293	8031200
RGS1	EYS	0.215401	undirected	7908388	8127396
NEXN	TMEM40	0.215447	undirected	7902495	8085393
RNA5SP31	HIST1H3H	0.215467	undirected	7969358	8117589
NRGN	LTBP1	0.215493	undirected	7944876	8041383
SOCS3	ZMAT1	0.215494	undirected	8018864	8174119
MTCYBP41	HGD	0.215549	undirected	7950895	8089851
GAS5	PKHD1L1	0.215567	undirected	7922406	8147891
NEXN	DNM3	0.215571	undirected	7902495	7907370
RNVU1-6	SOCS3	0.215574	undirected	7904715	8018864
ACKR3	ENC1	0.215577	undirected	8049471	8112615
SPARC	DUSP4	0.215614	undirected	8115327	8150076
NRGN	SOCS3	0.21564	undirected	7944876	8018864
RAB27B	LY6G6F	0.215664	undirected	8021301	8178063
F5	ACKR3	0.215709	undirected	7922174	8049471
RNVU1-15	HIST1H3A	0.215723	undirected	7919560	8117330
MTND4P11	RN7SL472P	0.215732	undirected	7917792	7981333
ITGA2B	TFPI	0.215767	undirected	8016044	8057599
NEXN	PPBP	0.215785	undirected	7902495	8100971
MFAP3L	PLK2	0.215787	undirected	8103695	8112202
PF4	MT-ND1	0.215806	undirected	8100966	8165656
RPL23	HIST1H2AB	0.215809	undirected	8014755	8124391
GAS5	NA	0.215827	undirected	7922408	7926983
ENKUR	TUBB1	0.215842	undirected	7932598	8063716
HIST1H2AE	HIST1H2AJ	0.215844	undirected	8117408	8124518
SNCA	HIST1H2BB	0.215854	undirected	8101762	8124394
GAS5	HIST1H2AJ	0.215856	undirected	7922406	8124518
JAM3	GYPA	0.21587	undirected	7945262	8102998
THBS1	SMAD1	0.215881	undirected	7982597	8097657
DENND2C	NA	0.215891	undirected	7918768	8003859
SNORA37	MPIG6B	0.215892	undirected	8023392	8118249
PROS1	SPARC	0.215902	undirected	8089015	8115327
SPARC	PKHD1L1	0.215903	undirected	8115327	8147891
MMRN1	GUCY1B1	0.215905	undirected	8096415	8097973
ZNF385D	DUSP4	0.215907	undirected	8085774	8150076
SNHG1	SNHG1	0.215912	undirected	7948902	7948904
PROS1	EGF	0.215944	undirected	8089015	8096845
ITGA2B	DAB2	0.215972	undirected	8016044	8111772
TMEM40	HIST1H2BB	0.215993	undirected	8085393	8124394
HIST1H1A	HIST1H2AB	0.215996	undirected	8124380	8124391
PROS1	GUCY1B1	0.216017	undirected	8089015	8097973
GP1BA	ALOX12	0.216018	undirected	8004024	8004221
LGALSL	MT-TQ	0.216038	undirected	8042283	8165694
NA	ENC1	0.216061	undirected	7928907	8112615
RNVU1-15	CCL4	0.216064	undirected	7919556	8006602
HBA2	HIST1H2BG	0.216067	undirected	7991762	8124423
MEIS1	DDX11L16	0.216079	undirected	8042356	8054758
HIST2H3PS2	HIST2H2BE	0.216088	undirected	7919614	7919637
MT-TQ	LGALSL	0.216102	undirected	7911335	8042283
HIST1H2AL	CLU	0.216102	undirected	8117608	8149927
BCL3	ELL2	0.216138	undirected	8029465	8113220
HIST1H2BB	HIST1H1B	0.216161	undirected	8124394	8124527
MPL	HBB	0.216161	undirected	7900683	7946033
CD14	SYAP1	0.216164	undirected	8114612	8166219
HBA2	HIST1H2BG	0.216165	undirected	7991766	8124423
SHTN1	BCL3	0.21623	undirected	7936529	8029465
ELL2	BCL3	0.216284	undirected	7921344	8029465
GAS5	NA	0.216309	undirected	7922400	7922416
PVALB	HIST1H2BI	0.216361	undirected	8075838	8117429
RAB27B	LY6G6F	0.216449	undirected	8021301	8118235
HIST1H2BB	HIST1H4D	0.216453	undirected	8124394	8124413
DENND2C	HIST1H3J	0.216465	undirected	7918768	8124537
RNVU1-6	GP1BA	0.216469	undirected	7904715	8004024
MIR516B2	PPBP	0.21647	undirected	8031031	8100971
STRADB	FAXDC2	0.216533	undirected	7901336	8115397
TXN	COX7B	0.216556	undirected	8163185	8168470
PLAUR	CD14	0.216569	undirected	8037374	8114612
RNVU1-15	HIST1H3H	0.216597	undirected	7919560	8117589
HIST1H3A	HIST1H3J	0.216606	undirected	8117330	8124537
ITGA2B	MEIS1	0.216614	undirected	8016044	8042356
CCDC175	ABLIM3	0.216641	undirected	7979444	8109093
IL10	GAGE12J	0.216647	undirected	7923907	8167560
S100A12	AREG	0.216651	undirected	7920238	8095744
EIF5	NA	0.216659	undirected	7977075	8127423
STRADB	HIST2H2BB	0.216663	undirected	7901336	7919584
ABLIM3	NA	0.216666	undirected	8109093	8117583
NRGN	TREML1	0.216672	undirected	7944876	8126269
SNORA37	HIST1H2AL	0.216673	undirected	8023392	8117608
NA	HIST1H2BI	0.216673	undirected	7959572	8117429
OR2T8	PPBP	0.216722	undirected	7911233	8100971
OR2T8	PRKAR2B	0.216734	undirected	7911233	8135378
MT-ND1	CAVIN2	0.216736	undirected	7896746	8057797
IL10	RPL23	0.21677	undirected	7923907	8014755
SNORA37	PLK2	0.216775	undirected	8023392	8112202
RNVU1-6	FSTL1	0.216783	undirected	7904715	8089835
RGS18	BMP6	0.216802	undirected	7908376	8116818
CAVIN2	HIST1H2BG	0.216803	undirected	8057797	8124423
MEIS1	MPIG6B	0.21685	undirected	8042356	8178074
PLK2	NFIB	0.216852	undirected	8112202	8160138
PLOD2	HIST1H2BO	0.216875	undirected	8091283	8117614
FSTL1	HIST1H2BN	0.216925	undirected	8089835	8117600
GAS5	NA	0.21694	undirected	7922406	8127423
NA	RNA5SP31	0.216984	undirected	7928907	7969358
DAB2	HIST1H2AE	0.217006	undirected	8111772	8117408
THBS1	SLC7A5	0.217019	undirected	7982597	8003298
RNU5E-1	MT-CO1	0.217021	undirected	7897801	8165663
PROS2P	HIST1H2BG	0.217046	undirected	8089011	8124423
RPL23	NA	0.217055	undirected	8014755	8117583
CCDC175	SNORA37	0.217059	undirected	7979444	8023392
MT-CO1	RNU5E-1	0.217072	undirected	7896750	7897801
CLC	HIST1H2BO	0.217113	undirected	8036755	8117614
RN7SL472P	IGF2BP3	0.217113	undirected	7981333	8138566
LTBP1	SNCA	0.217149	undirected	8041383	8101762
GAS5	NA	0.217155	undirected	7922414	7928907
NRGN	TUBB1	0.217162	undirected	7944876	8063716
DUSP5	SOCS1	0.217184	undirected	7930413	7999423
P2RY12	ELOVL2-AS1	0.217193	undirected	8091530	8116904
PPBP	HIST1H3F	0.217235	undirected	8100971	8124437
HIST1H2BH	HIST1H2BO	0.21728	undirected	8117426	8117614
GAS5	NA	0.217284	undirected	7922414	7926983
HSPA2	RN7SL472P	0.217293	undirected	7975076	7981333
SNHG1	HIST1H2AE	0.217297	undirected	7948904	8117408
HIST1H2BI	HIST1H1A	0.217298	undirected	8117429	8124380
SNHG12	RPL23	0.21731	undirected	7914212	8014755
MT-ND1	DNM3	0.217351	undirected	7896746	7907370
PDE3A	GP1BB	0.217383	undirected	7954293	8071268
LGALSL	MYCT1	0.217389	undirected	8042283	8122860
HIST2H4A	LY6G6F	0.217391	undirected	7905067	8178063
ASAP2	GP1BB	0.217412	undirected	8040113	8071268
HSPA2	PROS1	0.21744	undirected	7975076	8089015
PDE5A	BMP6	0.217496	undirected	8102532	8116818
CD69	AKAP6	0.217507	undirected	7961075	7973850
HIST2H2BB	HIST1H3J	0.217523	undirected	7919584	8124537
JAM3	CMTM5	0.217536	undirected	7945262	7973403
HIST2H3PS2	HIST1H2BO	0.217538	undirected	7919614	8117614
RPL23	HIST1H3A	0.217542	undirected	8014755	8117330
RGS6	MMRN1	0.217546	undirected	7975482	8096415
ITGA2B	IGF2BP3	0.217555	undirected	8016044	8138566
HIST1H2BH	NA	0.217565	undirected	8117426	8161943
SNHG1	HIST1H2BH	0.217578	undirected	7948906	8117426
HIST2H3PS2	HIST2H2BE	0.217588	undirected	7905085	7919637
HIST2H4A	HIST1H2BI	0.217622	undirected	7919627	8117429
PLK2	HIST1H3H	0.217707	undirected	8112202	8117589
CTTN	RGS6	0.217721	undirected	7942204	7975482
HIST2H4A	LY6G6F	0.217754	undirected	7919627	8178063
ALOX12	USP46	0.217759	undirected	8004221	8100328
RNVU1-6	CMTM5	0.217762	undirected	7904715	7973403
HIST1H2BH	SNORA33	0.217762	undirected	8117426	8122144
HGD	HIST1H2AI	0.217764	undirected	8093278	8117580
DUSP5	SMC4	0.217766	undirected	7930413	8083737
MTND2P19	PPBP	0.217768	undirected	8055486	8100971
RNU4ATAC	PF4	0.217785	undirected	8044961	8100966
HIST1H2AH	HIST1H2AI	0.217787	undirected	8117543	8117580
HGD	HIST1H2AI	0.217809	undirected	8089851	8117580
HIST1H2BO	HIST1H3F	0.217811	undirected	8117614	8124437
HGD	ELOVL2-AS1	0.217822	undirected	8093278	8116904
STRADB	HIST1H2BG	0.217849	undirected	8047443	8124423
HIST1H2BI	HIST1H2AM	0.21785	undirected	8117429	8124540
RNVU1-6	PROS1	0.217891	undirected	7904715	8089015
RNVU1-6	HIST1H2AI	0.217893	undirected	7904715	8117580
SOCS1	NFIB	0.217894	undirected	7999423	8160138
RNVU1-15	HIST1H2AH	0.217944	undirected	7919560	8117543
HIST2H4A	PKHD1L1	0.217946	undirected	7905067	8147891
GAS5	ZNF385D	0.21795	undirected	7922400	8085774
STRADB	PROS2P	0.217963	undirected	8047443	8089011
RNVU1-15	HIST1H2BJ	0.21797	undirected	7919560	8124484
HIST2H4A	HIST1H2BI	0.217974	undirected	7905067	8117429
HIST2H2BE	ITGA2B	0.217978	undirected	7919637	8016044
SOCS1	FAXDC2	0.218026	undirected	7999423	8115397
RN7SL472P	ASAP2	0.218032	undirected	7981333	8040113
MEIS1	MPIG6B	0.218057	undirected	8042356	8179313
HIST2H4A	PKHD1L1	0.218066	undirected	7919627	8147891
ENKUR	CA2	0.218079	undirected	7932598	8147132
GAS5	HIST1H2AE	0.218162	undirected	7922414	8117408
MEIS1	P2RY12	0.218195	undirected	8042356	8091530
AKAP6	SMC4	0.218199	undirected	7973850	8083737
RNU4ATAC	PTGS1	0.218202	undirected	8044961	8157650
HIST2H2BE	PROS2P	0.218212	undirected	7919637	8089011
APOBEC3A	PPBP	0.218217	undirected	8073056	8100971
SNHG1	HIST1H3A	0.218245	undirected	7948900	8117330
HIST2H2BE	HIST1H3B	0.218269	undirected	7919637	8124388
HIST2H4A	LY6G6F	0.218296	undirected	7905067	8118235
ELOVL2-AS1	NA	0.218306	undirected	8116904	8117583
RN7SL472P	MEIS1	0.218331	undirected	7981333	8042356
TNFAIP3	DYNLT1	0.218338	undirected	8122265	8130499
HIST1H3J	PKHD1L1	0.218363	undirected	8124537	8147891
JAM3	PLK2	0.218364	undirected	7945262	8112202
ALOX12	TMEM40	0.218404	undirected	8004221	8085393
FAXDC2	HIST1H2AL	0.218438	undirected	8115397	8117608
STRADB	MFAP3L	0.218444	undirected	8047443	8103695
HIST1H2AH	CKS2	0.218453	undirected	8117543	8156290
RNVU1-15	HIST1H3A	0.218462	undirected	7919556	8117330
RNVU1-15	MND1	0.218463	undirected	7919560	8097857
CTLA4	SNHG5	0.218468	undirected	8047692	8127989
MT-ND1	SPARC	0.218483	undirected	7896746	8115327
PLOD2	CA2	0.218515	undirected	8091283	8147132
SNORA37	TREML1	0.218517	undirected	8023392	8126269
RNVU1-6	SNORA37	0.218566	undirected	7904715	8023392
MMD	DAB2	0.218599	undirected	8016832	8111772
PVALB	PPBP	0.218601	undirected	8075838	8100971
HGD	ELOVL2-AS1	0.218635	undirected	8089851	8116904
ALOX12	PROS1	0.218639	undirected	8004221	8089015
HIST2H4A	LY6G6F	0.218656	undirected	7919627	8118235
GAS5	FABP5	0.218683	undirected	7922412	8147049
HIST1H2AH	SNHG5	0.218687	undirected	8117543	8127989
CD69	PAQR8	0.218702	undirected	7961075	8120215
ENKUR	IGF2BP3	0.218723	undirected	7932598	8138566
DENND2C	SLFN14	0.218726	undirected	7918768	8014259
EIF4A2	HIST1H2AJ	0.218735	undirected	8084708	8124518
NA	SNORA2A	0.218753	undirected	7928907	7962827
CMTM5	PKHD1L1	0.218758	undirected	7973403	8147891
HIST1H2BM	HIST1H1B	0.218767	undirected	8117594	8124527
ANKRD36C	HIST1H2BI	0.218776	undirected	8053797	8117429
RNVU1-6	DUSP4	0.21878	undirected	7904715	8150076
RNU6-82P	RNU6-975P	0.218796	undirected	7968295	8120715
ALOX12	PPBP	0.218812	undirected	8004221	8100971
PROS1	ELOVL7	0.218819	undirected	8089015	8112274
HIST2H3PS2	HIST1H2BO	0.218836	undirected	7905085	8117614
GAS5	NA	0.218846	undirected	7922400	8174226
MIR516B2	CAVIN2	0.218859	undirected	8031031	8057797
SNHG1	RNU6-918P	0.218859	undirected	7948904	8156759
EIF4A2	DKC1	0.21886	undirected	8084708	8170990
TMEM40	HIST1H2BG	0.21887	undirected	8085393	8124423
NA	RNY4P17	0.218885	undirected	8027437	8098289
RNA5SP31	RNU4ATAC	0.218906	undirected	7969358	8044961
PDE3A	SNORA37	0.218928	undirected	7954293	8023392
HIST2H4A	HIST2H2BE	0.218929	undirected	7919627	7919637
RNVU1-6	MPIG6B	0.218935	undirected	7904715	8178074
CMTM5	MPIG6B	0.218968	undirected	7973403	8178074
HIST2H4A	PDE3A	0.21898	undirected	7905067	7954293
ITGA2B	HIST1H2AI	0.218985	undirected	8016044	8117580
ABLIM3	EYS	0.219002	undirected	8109093	8127396
NA	PKHD1L1	0.219014	undirected	8117583	8147891
HIST1H3H	MT-ND1	0.219016	undirected	8117589	8165656
FOSL2	SMC4	0.219022	undirected	8041048	8083737
RNVU1-15	NCKAP1	0.219039	undirected	7919556	8057517
PF4	MYCT1	0.219039	undirected	8100966	8122860
GAS5	SNORA33	0.219052	undirected	7922400	8122144
SNORD101	NA	0.219057	undirected	8122142	8127423
HIST2H4A	HSPA8	0.219078	undirected	7919627	7952335
SLC7A5	CD14	0.219092	undirected	8003298	8114612
PDE5A	MPIG6B	0.219094	undirected	8102532	8118249
HIST2H2BB	HIST2H2BB	0.219104	undirected	7919584	7919606
CES1P1	ACKR3	0.219126	undirected	8001457	8049471
PROS1	VTRNA1-3	0.219131	undirected	8089015	8108631
PRKAR2B	LY6G6F	0.219133	undirected	8135378	8178063
HIST2H4A	HIST2H2BE	0.219142	undirected	7905067	7919637
SELP	KIR3DX1	0.219149	undirected	7922200	8031200
HIST2H3PS2	SELP	0.219161	undirected	7919612	7922200
LY6G6F	PRKAR2B	0.219185	undirected	8118235	8135378
RNA5SP31	HIST1H2BH	0.219192	undirected	7969358	8117426
MMRN1	NA	0.219192	undirected	8096415	8117583
RNVU1-6	SELP	0.219276	undirected	7904715	7922200
STRADB	P2RY12	0.219296	undirected	7901336	8091530
HIST2H4A	HSPA8	0.219308	undirected	7905067	7952335
SNHG12	PKHD1L1	0.219323	undirected	7914202	8147891
GP1BB	PTGS1	0.21934	undirected	8071268	8157650
ALOX12	RNU6-918P	0.219362	undirected	8004221	8156759
SELP	MYCT1	0.219372	undirected	7922200	8122860
RNU5E-1	LINC00328-2P	0.21938	undirected	7897801	8155453
NA	SNHG1	0.219405	undirected	7922416	7948908
MPL	TMEM40	0.219422	undirected	7900683	8085393
DNM3	MT-ND1	0.219423	undirected	7907370	8165656
KLF11	AREG	0.219431	undirected	8040211	8095744
ANKRD36C	NA	0.219465	undirected	8053797	8119076
HIST2H4A	PDE3A	0.219486	undirected	7919627	7954293
PLK2	MPIG6B	0.219494	undirected	8112202	8118249
NUSAP1	HIST1H2AE	0.219497	undirected	7982889	8117408
HSPA8	CCL4	0.219501	undirected	7952335	8006602
JAM3	SNORA37	0.219508	undirected	7945262	8023392
DAB2	HIST1H2BO	0.21954	undirected	8111772	8117614
MMRN1	MYCT1	0.219578	undirected	8096415	8122860
EIF5	HIST1H3A	0.219585	undirected	7977075	8117330
HBD	IGF2BP3	0.219624	undirected	7946041	8138566
SNHG1	NA	0.219651	undirected	7948904	8161943
GAS5	SNORD101	0.21967	undirected	7922400	8122142
FSTL1	HIST1H3J	0.219723	undirected	8089835	8124537
STRADB	TFPI	0.21973	undirected	8047443	8057599
GP1BA	SNORA37	0.219783	undirected	8004024	8023392
BCL3	JMY	0.219798	undirected	8029465	8106516
RGS13	SELP	0.219826	undirected	7908397	7922200
RNVU1-15	HIST1H2AH	0.219828	undirected	7919556	8117543
PRKAR2B	MT-TQ	0.219847	undirected	8135378	8165694
HIST2H4A	HBA2	0.219848	undirected	7905067	7991766
ALOX12	HIST1H2BG	0.219851	undirected	8004221	8124423
HIST2H4A	HBA2	0.219856	undirected	7905067	7991762
HSPA8	SNHG5	0.219869	undirected	7952335	8127987
SNHG12	GAS5	0.219887	undirected	7914212	7922414
MFSD2B	PROS1	0.219925	undirected	8040522	8089015
RNVU1-15	HIST1H3H	0.219928	undirected	7919556	8117589
MT-TQ	PRKAR2B	0.219944	undirected	7911335	8135378
SNHG1	RPL23	0.21995	undirected	7948904	8014755
RNVU1-3	HIST1H2AI	0.219961	undirected	7904963	8117580
MMRN1	HIST1H2BO	0.219967	undirected	8096415	8117614
HIST1H2AJ	SNHG5	0.219975	undirected	8124518	8127989
HIST2H2BB	HIST1H2AH	0.219983	undirected	7919606	8117543
RNVU1-3	HIST1H2AI	0.219987	undirected	7904480	8117580
AREG	TNFAIP3	0.220009	undirected	8095736	8122265
JAM3	HIST1H2AI	0.220016	undirected	7945262	8117580
PLOD2	DCAF12	0.220035	undirected	8091283	8160756
NRGN	PRKAR2B	0.22007	undirected	7944876	8135378
SNHG1	RNA5SP31	0.220077	undirected	7948908	7969358
HIST2H4A	RPL23	0.220088	undirected	7919627	8014755
THBS1	DYNLT1	0.220109	undirected	7982597	8130499
HIST2H2BB	HIST1H2BO	0.22011	undirected	7919584	8117614
SNORA80E	LTBP1	0.220117	undirected	7920873	8041383
GNG11	MT-TQ	0.220143	undirected	8134257	8165694
SOCS1	PPBP	0.220148	undirected	7999423	8100971
RNVU1-15	RNY3P2	0.220165	undirected	7919556	7969091
DDX11L16	GUCY1B1	0.22017	undirected	8054758	8097973
MIR516B2	PKHD1L1	0.22017	undirected	8031031	8147891
SNHG1	NA	0.220184	undirected	7948908	8161943
PLOD2	HIST1H2BI	0.220192	undirected	8091283	8117429
BMP6	HIST1H2BO	0.220203	undirected	8116818	8117614
SNHG1	ALOX12	0.22026	undirected	7948904	8004221
SNORA37	HIST1H2BN	0.220267	undirected	8023392	8117600
PROS2P	MYCT1	0.220271	undirected	8089011	8122860
HIST2H4A	RPL23	0.220279	undirected	7905067	8014755
MT-ND1	PRKAR2B	0.220283	undirected	7896746	8135378
MT-TQ	GNG11	0.220307	undirected	7911335	8134257
CLEC1B	RGS6	0.220352	undirected	7961102	7975482
NA	HIST1H2BG	0.220357	undirected	8117583	8124423
RNU5E-1	SNORA2A	0.220376	undirected	7897801	7962827
ZNF385D	ABLIM3	0.220389	undirected	8085774	8109093
NA	HIST1H3J	0.22039	undirected	8117583	8124537
IL10	TMEM40	0.220439	undirected	7923907	8085393
MPL	IGF2BP3	0.220463	undirected	7900683	8138566
CMTM5	MPIG6B	0.220464	undirected	7973403	8179313
HIST2H4A	HBA2	0.220529	undirected	7919627	7991766
HIST2H4A	HBA2	0.220538	undirected	7919627	7991762
HIST2H3PS2	SNORA37	0.220543	undirected	7919612	8023392
SOCS3	CLU	0.220552	undirected	8018864	8149927
RNU4ATAC	SH3BGRL2	0.220558	undirected	8044961	8120833
HIST1H2AI	SNORD101	0.220597	undirected	8117580	8122142
HIST1H2BN	ZMAT1	0.22064	undirected	8117600	8174119
PPBP	ZMAT1	0.22065	undirected	8100971	8174119
HBB	HSPA8	0.220662	undirected	7946033	7952335
LGALSL	RNU4ATAC	0.220736	undirected	8042283	8044961
GP1BA	NA	0.220773	undirected	8004024	8117583
CLC	ABLIM3	0.220774	undirected	8036755	8109093
RPL23	HIST1H2AI	0.220794	undirected	8014755	8117580
PF4V1	HIST1H3H	0.220794	undirected	8095694	8117589
SNORD101	HIST1H2AM	0.220817	undirected	8122142	8124540
FOSL2	TIPARP	0.220841	undirected	8041048	8083569
CLEC1B	STRADB	0.220846	undirected	7961102	8047443
SNHG12	HIST1H2AH	0.220872	undirected	7914202	8117543
CLC	GP1BB	0.22089	undirected	8036755	8071268
SOCS1	MFSD2B	0.220921	undirected	7999423	8040522
SH3BGRL2	ZMAT1	0.220927	undirected	8120833	8174119
NR4A2	TBRG4	0.220941	undirected	8055952	8139482
PKHD1L1	CLU	0.220942	undirected	8147891	8149927
STRADB	RGS6	0.220978	undirected	7901336	7975482
MFSD2B	FSTL1	0.220998	undirected	8040522	8089835
PROS2P	PRKAR2B	0.221016	undirected	8089011	8135378
RNU6-759P	PKHD1L1	0.221086	undirected	8065990	8147891
CCDC175	GYPA	0.221109	undirected	7979444	8102998
CA2	NFIB	0.221115	undirected	8147132	8160138
RNY3P2	ABCB4	0.221118	undirected	7969091	8140752
RGS18	MPIG6B	0.221132	undirected	7908376	8118249
SNHG12	SNORD101	0.221137	undirected	7914214	8122142
GYPA	FAXDC2	0.221163	undirected	8102998	8115397
MEIS1	DUSP4	0.221208	undirected	8042356	8150076
HSPA2	HIST1H2BO	0.221228	undirected	7975076	8117614
HIST1H2BI	HIST1H3H	0.221229	undirected	8117429	8117589
ALOX12	PLOD2	0.221237	undirected	8004221	8091283
HIST1H3H	ZMAT1	0.221243	undirected	8117589	8174119
SNORA37	GNG11	0.221249	undirected	8023392	8134257
PROS2P	PTGS1	0.221283	undirected	8089011	8157650
ACKR3	TIPARP	0.22129	undirected	8049471	8083569
STRADB	HIST1H2AE	0.221318	undirected	8047443	8117408
PDE3A	TFPI	0.221323	undirected	7954293	8057599
NEXN	USP46	0.221335	undirected	7902495	8100328
HIST1H3A	HIST1H2BN	0.22135	undirected	8117330	8117600
RNU5E-1	MT-ND2	0.221384	undirected	7897801	8165658
HIST1H2AE	BEND2	0.221439	undirected	8117408	8171545
GAS5	SNHG1	0.221479	undirected	7922408	7948910
IL10	CLU	0.221489	undirected	7923907	8149927
MPL	RNU6-918P	0.221512	undirected	7900683	8156759
HIST1H2AI	HIST1H2BO	0.221514	undirected	8117580	8117614
RNVU1-6	EGF	0.221519	undirected	7904715	8096845
MEIS1	MFAP3L	0.22154	undirected	8042356	8103695
GP1BA	RNU4ATAC	0.221559	undirected	8004024	8044961
C15orf54	HIST1H3H	0.22156	undirected	7982593	8117589
HIST1H3A	SNORA33	0.221563	undirected	8117330	8122144
LILRA5	COX7B	0.221588	undirected	8039236	8168470
CCDC175	NA	0.221594	undirected	7979444	8119076
RGS18	PLOD2	0.221613	undirected	7908376	8091283
MFAP3L	MPIG6B	0.221634	undirected	8103695	8178074
SOCS3	ABLIM3	0.221636	undirected	8018864	8109093
MT-TQ	HIST1H3H	0.221639	undirected	7911335	8117589
HIST1H3H	MT-TQ	0.221644	undirected	8117589	8165694
ALOX12	MYCT1	0.221662	undirected	8004221	8122860
KLF11	CD14	0.221671	undirected	8040211	8114612
RNVU1-15	HIST2H2BE	0.221791	undirected	7919560	7919637
C15orf54	PF4	0.221823	undirected	7982593	8100966
HIST2H2BB	HIST1H2AH	0.221872	undirected	7919584	8117543
PER1	KLF11	0.221919	undirected	8012349	8040211
RNVU1-15	HIST1H2BJ	0.221925	undirected	7919556	8124484
ENKUR	RAB27B	0.221938	undirected	7932598	8021301
NA	GNG11	0.221962	undirected	8117583	8134257
GUCY1B1	DUSP4	0.221975	undirected	8097973	8150076
SNHG3	RNA5SP31	0.221978	undirected	7899480	7969358
NA	MMRN1	0.221981	undirected	7922416	8096415
AREG	CD14	0.222011	undirected	8095736	8114612
PPBP	PKHD1L1	0.222059	undirected	8100971	8147891
JAM3	PROS1	0.222066	undirected	7945262	8089015
NEXN	RNA5SP31	0.222092	undirected	7902495	7969358
FSTL1	HBEGF	0.222094	undirected	8089835	8114572
GAS5	EIF5	0.222096	undirected	7922410	7977075
NRGN	PF4V1	0.222105	undirected	7944876	8095694
HIST2H3PS2	HIST1H2BM	0.2222	undirected	7919614	8117594
RGS6	HIST1H2BG	0.222206	undirected	7975482	8124423
NR4A2	TNFAIP3	0.222233	undirected	8055952	8122265
SOCS3	PTGS1	0.222255	undirected	8018864	8157650
SNHG12	HIST1H2BB	0.222297	undirected	7914212	8124394
ITGA2B	PROS2P	0.222349	undirected	8016044	8089011
SLFN14	MPIG6B	0.222382	undirected	8014259	8118249
RNVU1-6	HIST1H2BO	0.22245	undirected	7904715	8117614
RN7SL472P	SOCS3	0.222455	undirected	7981333	8018864
GAS5	RPL23	0.222516	undirected	7922400	8014755
OSER1	EIF4A2	0.222524	undirected	8066402	8084704
SNHG1	NA	0.222545	undirected	7948908	8174226
DENND2C	RPL23	0.222561	undirected	7918768	8014755
NA	EIF4A2	0.222568	undirected	7928907	8084708
PTGS1	MT-ND1	0.222615	undirected	8157650	8165656
OR2T8	RNA5SP31	0.222617	undirected	7911233	7969358
SNORA80E	HIST1H2AJ	0.222622	undirected	7920873	8124518
RNVU1-15	RNY3P2	0.222636	undirected	7919560	7969091
HIST2H3PS2	SNORA37	0.222674	undirected	7919614	8023392
DUSP4	NFIB	0.222699	undirected	8150076	8160138
RGS13	PKHD1L1	0.222718	undirected	7908397	8147891
PTCH2	HIST1H2AE	0.222747	undirected	7915612	8117408
RN7SL472P	SPARC	0.222751	undirected	7981333	8115327
HIST1H2BC	HIST1H2AK	0.222755	undirected	8124406	8124524
CCDC175	HIST1H3J	0.222755	undirected	7979444	8124537
GAS5	HIST1H2BI	0.222762	undirected	7922410	8117429
GP1BA	MYCT1	0.222766	undirected	8004024	8122860
PTCH2	SNORA2A	0.22279	undirected	7915612	7962827
PTGS1	MT-TQ	0.222866	undirected	8157650	8165694
CLEC1B	SLFN14	0.222883	undirected	7961102	8014259
GAS5	HIST1H2AH	0.222888	undirected	7922414	8117543
NEXN	SNHG1	0.2229	undirected	7902495	7948900
NR4A2	PAQR8	0.22293	undirected	8055952	8120215
MT-TQ	PTGS1	0.22294	undirected	7911335	8157650
PPBP	NA	0.222942	undirected	8100971	8117583
HIST1H2BH	PKHD1L1	0.222958	undirected	8117426	8147891
NEXN	GAS5	0.222997	undirected	7902495	7922406
C15orf54	FSTL1	0.223026	undirected	7982593	8089835
RGS6	GUCY1B1	0.223033	undirected	7975482	8097973
RNVU1-15	GAS5	0.223131	undirected	7919556	7922414
HIST1H3A	HIST1H2AL	0.223149	undirected	8117330	8117608
CMTM5	MPIG6B	0.223155	undirected	7973403	8118249
PDE5A	MPIG6B	0.223159	undirected	8102532	8179313
RNA5SP31	HIST1H3A	0.223171	undirected	7969358	8117330
GP1BA	APOBEC3A	0.223267	undirected	8004024	8073056
NA	HIST1H2BJ	0.223269	undirected	8117583	8124484
NA	SNORD101	0.223284	undirected	7926983	8122142
RGS13	SNORA37	0.223348	undirected	7908397	8023392
HSPA8	CTLA4	0.223397	undirected	7952335	8047692
STRADB	SLFN14	0.223427	undirected	7901336	8014259
CLEC1B	ELOVL2-AS1	0.223436	undirected	7961102	8116904
HIST1H2AE	HIST1H3B	0.223483	undirected	8117408	8124388
LGALSL	NA	0.22351	undirected	8042283	8117583
MTND4P11	IL10	0.223514	undirected	7917792	7923907
HIST1H3A	HIST1H3F	0.223556	undirected	8117330	8124437
ST5	COX7B	0.223593	undirected	7946401	8168470
ALOX12	PVALB	0.223601	undirected	8004221	8075838
SLFN14	HIST1H2BG	0.223613	undirected	8014259	8124423
IGF2BP3	PTGS1	0.223678	undirected	8138566	8157650
ENKUR	CLU	0.223687	undirected	7932598	8149927
AREG	SMAD1	0.223707	undirected	8095736	8097657
HIST1H2BO	TREML1	0.223712	undirected	8117614	8126269
RHOBTB1	PDE5A	0.223733	undirected	7933821	8102532
HIST2H3PS2	SNORA37	0.223737	undirected	7905085	8023392
NA	MPIG6B	0.223744	undirected	8117583	8118249
RAB27B	CA2	0.22375	undirected	8021301	8147132
GAS5	HIST1H2AM	0.22377	undirected	7922406	8124540
MT-TQ	MT-TQ	0.22378	undirected	7911335	8165694
GAS5	SNHG1	0.223803	undirected	7922406	7948910
SLC14A1	TFPI	0.223815	undirected	8021081	8057599
MEIS1	NA	0.223868	undirected	8042356	8117583
GAS5	MMRN1	0.223868	undirected	7922412	8096415
MFSD2B	EYS	0.223881	undirected	8040522	8127396
CTLA4	HIST1H3J	0.2239	undirected	8047692	8124537
FABP5	FABP5	0.2239	undirected	7948420	8147049
F5	PAQR8	0.223905	undirected	7922174	8120215
SNHG1	ZFAS1	0.223924	undirected	7948900	8063345
SOCS1	MMRN1	0.223933	undirected	7999423	8096415
RNA5SP31	SNORD101	0.223942	undirected	7969358	8122142
RGS18	ELOVL2-AS1	0.223942	undirected	7908376	8116904
LGALSL	IGF2BP3	0.224022	undirected	8042283	8138566
JAM3	MMD	0.224041	undirected	7945262	8016832
RNA5SP31	LINC00328-2P	0.224043	undirected	7969358	8161375
NA	MPIG6B	0.224043	undirected	8117583	8179313
HIST2H2BE	LGALSL	0.224056	undirected	7919637	8042283
SNORA37	HIST1H3F	0.224108	undirected	8023392	8124437
RNVU1-15	PVALB	0.224126	undirected	7919560	8075838
MEIS1	DCAF12	0.22413	undirected	8042356	8160756
ANKRD36C	HIST1H2BH	0.224162	undirected	8053797	8117426
NA	ZMAT1	0.224164	undirected	8117583	8174119
MT-CO1	NA	0.224165	undirected	8113356	8127423
SNORA37	IGF2BP3	0.224209	undirected	8023392	8138566
HIST2H3PS2	HIST1H2BM	0.224212	undirected	7905085	8117594
CAVIN2	NA	0.224217	undirected	8057797	8117583
MTCYBP41	HIST1H2BC	0.224231	undirected	7950895	8124406
MPL	HIST1H2BI	0.224242	undirected	7900683	8117429
JAM3	PDE5A	0.224245	undirected	7945262	8102532
HSPA2	TMEM40	0.224246	undirected	7975076	8085393
NUSAP1	HGD	0.224247	undirected	7982889	8093278
EIF5	ENC1	0.22425	undirected	7977075	8112615
SNHG1	EIF4A2	0.22425	undirected	7948902	8084708
MT-ND1	HIST1H2AE	0.224262	undirected	7896746	8117408
PLOD2	MPIG6B	0.224264	undirected	8091283	8118249
MMD	MPIG6B	0.22428	undirected	8016832	8179313
NEXN	DUSP4	0.22429	undirected	7902495	8150076
PDE3A	GYPA	0.224336	undirected	7954293	8102998
STRADB	HIST1H3J	0.224337	undirected	7901336	8124537
HIST1H2BI	RNU6-918P	0.224355	undirected	8117429	8156759
RPL23	PVALB	0.224381	undirected	8014755	8075838
NA	AREG	0.224406	undirected	7925318	8095736
RN7SL472P	MFSD2B	0.224413	undirected	7981333	8040522
SLFN14	DAB2	0.224481	undirected	8014259	8111772
GAS5	RNU6-1101P	0.224485	undirected	7922408	8092886
HIST1H2BH	HIST1H2BG	0.224495	undirected	8117426	8124423
GNG11	BEND2	0.224508	undirected	8134257	8171545
HIST1H2BO	DUSP4	0.224539	undirected	8117614	8150076
STRADB	HIST1H2BI	0.224541	undirected	8047443	8117429
TMEM40	NA	0.224568	undirected	8085393	8117583
HIST2H3PS2	HIST2H2BE	0.224594	undirected	7919612	7919637
SNORA37	HIST1H2BH	0.224623	undirected	8023392	8117426
CES1P1	BCL3	0.224693	undirected	8001457	8029465
RN7SL472P	HIST1H2AE	0.224717	undirected	7981333	8117408
PDE3A	ASAP2	0.224737	undirected	7954293	8040113
HIST1H2AB	DUSP4	0.224766	undirected	8124391	8150076
ZNF385D	GNG11	0.224769	undirected	8085774	8134257
GUCY1B1	MYCT1	0.224782	undirected	8097973	8122860
PDE3A	LGALSL	0.224787	undirected	7954293	8042283
SNHG1	HIST1H2BH	0.224826	undirected	7948908	8117426
SNHG1	HIST1H2AJ	0.22485	undirected	7948900	8124518
PVALB	GNG11	0.224862	undirected	8075838	8134257
PTCH2	MTCYBP41	0.224868	undirected	7915612	7950895
GAS5	RPL23	0.224884	undirected	7922406	8014755
RNVU1-15	GAS5	0.224906	undirected	7919560	7922408
DNM3	LY6G6F	0.224911	undirected	7907370	8178063
RNVU1-15	SNHG1	0.224929	undirected	7919556	7948906
BMP6	HIST1H2AE	0.224943	undirected	8116818	8117408
ZNF385D	PROS1	0.224955	undirected	8085774	8089015
RGS18	MPIG6B	0.224965	undirected	7908376	8179313
PROS2P	PROS1	0.225011	undirected	8089011	8089015
MPL	HIST1H2AE	0.225012	undirected	7900683	8117408
MT-ND1	MT-ND1	0.225027	undirected	7896746	8165656
ELOVL2-AS1	PRKAR2B	0.225035	undirected	8116904	8135378
ALOX12	ELOVL7	0.225047	undirected	8004221	8112274
LTBP1	HIST1H4D	0.225062	undirected	8041383	8124413
RHOBTB1	PPBP	0.225074	undirected	7933821	8100971
HIST2H4A	MMRN1	0.225083	undirected	7905067	8096415
EGF	GNG11	0.225084	undirected	8096845	8134257
HIST2H4A	MMRN1	0.225099	undirected	7919627	8096415
HIST1H2BB	GNG11	0.225132	undirected	8124394	8134257
DNM3	LY6G6F	0.225152	undirected	7907370	8118235
HIST1H3A	NA	0.225156	undirected	8117330	8161943
PROS1	MPIG6B	0.225213	undirected	8089015	8179313
ACKR3	AREG	0.225221	undirected	8049471	8095736
RAB27B	HIST1H2BG	0.225246	undirected	8021301	8124423
HIST1H2AH	SNORD101	0.22525	undirected	8117543	8122142
RNVU1-15	GAS5	0.225251	undirected	7919556	7922408
ENKUR	MFAP3L	0.225269	undirected	7932598	8103695
RPL23	SNORA37	0.225274	undirected	8014755	8023392
CAVIN2	MT-ND1	0.225291	undirected	8057797	8165656
DENND2C	GAS5	0.2253	undirected	7918768	7922400
SELP	RGS6	0.225311	undirected	7922200	7975482
NA	PRKAR2B	0.225346	undirected	8117583	8135378
GP1BB	GAGE12J	0.225375	undirected	8071268	8167560
STRADB	ASAP2	0.225381	undirected	7901336	8040113
GAS5	HIST1H2AM	0.225386	undirected	7922408	8124540
LRRC75A-AS1	LINC00328-2P	0.225404	undirected	8005202	8161375
SLC14A1	BEND2	0.225427	undirected	8021081	8171545
SNHG1	SNHG1	0.225433	undirected	7948908	7948910
RNVU1-15	GAS5	0.225452	undirected	7919560	7922414
IL10	PLK2	0.225466	undirected	7923907	8112202
HIST1H3H	PKHD1L1	0.22551	undirected	8117589	8147891
RGS13	HIST1H2BO	0.225519	undirected	7908397	8117614
CMTM5	LTBP1	0.225564	undirected	7973403	8041383
HIST1H2AE	LINC00328-2P	0.225582	undirected	8117408	8161375
ITGA2B	EYS	0.225591	undirected	8016044	8127396
STRADB	HIST1H3H	0.225593	undirected	8047443	8117589
HBA2	HIST1H2BI	0.225595	undirected	7991762	8117429
HIST2H2BE	DDX11L16	0.22563	undirected	7919637	8054758
HIST1H2AL	MPIG6B	0.225645	undirected	8117608	8178074
SNHG12	USP46	0.225656	undirected	7914212	8100328
RGS6	MYCT1	0.225661	undirected	7975482	8122860
BCL3	KLF11	0.225691	undirected	8029465	8040211
CMTM5	CLC	0.225709	undirected	7973403	8036755
HBA2	HIST1H2BI	0.225717	undirected	7991766	8117429
ENKUR	LTBP1	0.225762	undirected	7932598	8041383
HIST1H2BB	DUSP4	0.225775	undirected	8124394	8150076
RNVU1-15	SNHG5	0.225799	undirected	7919556	8127987
MMRN1	TREML1	0.2258	undirected	8096415	8126269
TIPARP	TBRG4	0.225826	undirected	8083569	8139482
MMRN1	ELOVL7	0.225836	undirected	8096415	8112274
ENKUR	CLEC1B	0.225861	undirected	7932598	7961102
OLFM2	AREG	0.225866	undirected	8033818	8095744
PDE3A	PTGS1	0.225868	undirected	7954293	8157650
MT-ND1	GP1BA	0.225889	undirected	7896746	8004024
ALOX12	IGF2BP3	0.22591	undirected	8004221	8138566
PDE3A	HIST1H2BG	0.225935	undirected	7954293	8124423
GNG11	DCAF12	0.225959	undirected	8134257	8160756
EIF5	ANKRD36C	0.225965	undirected	7977075	8053797
AKAP6	NR4A2	0.225978	undirected	7973850	8055952
HIST1H2AE	SNORD101	0.225984	undirected	8117408	8122142
HSPA8	RNU6-918P	0.22599	undirected	7952335	8156759
HIST2H3PS2	HIST1H2AE	0.225999	undirected	7919614	8117408
PER1	PIGA	0.226	undirected	8012349	8171418
LRRC75A-AS1	LINC00328-2P	0.226006	undirected	8005202	8155453
HIST2H2BE	PKHD1L1	0.226009	undirected	7919637	8147891
GAS5	NA	0.226014	undirected	7922400	7926983
NA	HBA2	0.226041	undirected	7959572	7991762
HIST1H3B	CLU	0.226053	undirected	8124388	8149927
GP1BB	PKHD1L1	0.226059	undirected	8071268	8147891
RGS6	MFAP3L	0.226084	undirected	7975482	8103695
ELOVL7	NA	0.226096	undirected	8112274	8117583
EGF	HIST1H3H	0.226131	undirected	8096845	8117589
S100A12	SLC7A5	0.226148	undirected	7920238	8003298
NA	SNORA33	0.22615	undirected	7926983	8122144
RNA5SP31	PVALB	0.226153	undirected	7969358	8075838
HIST1H2BH	HIST1H2AB	0.226168	undirected	8117426	8124391
GAS5	HIST1H2AH	0.226169	undirected	7922406	8117543
NA	HBA2	0.226211	undirected	7959572	7991766
RPL23	KIR3DX1	0.226228	undirected	8014755	8031200
RPL23	MEIS1	0.226234	undirected	8014755	8042356
SNHG1	HIST1H3A	0.226255	undirected	7948906	8117330
RNVU1-15	HIST2H2BE	0.22628	undirected	7919556	7919637
HIST1H2AE	HIST1H2AM	0.22628	undirected	8117408	8124540
HIST1H3A	HIST1H2AJ	0.226293	undirected	8117330	8124518
AKAP6	NFIL3	0.22631	undirected	7973850	8162276
STRADB	TFPI	0.22632	undirected	7901336	8057599
ALOX12	DUSP4	0.226321	undirected	8004221	8150076
GAS5	HIST1H2AJ	0.22633	undirected	7922414	8124518
HIST2H2BE	PLK2	0.226342	undirected	7919637	8112202
SNHG1	HIST1H2AH	0.226349	undirected	7948904	8117543
RNY3P2	EIF5	0.226363	undirected	7969091	7977075
PRKAR2B	MT-ND1	0.2264	undirected	8135378	8165656
HIST1H3H	HIST1H2BC	0.226406	undirected	8117589	8124406
HIST1H2BH	NA	0.226433	undirected	8117426	8119076
DDX11L16	HIST1H2BJ	0.226433	undirected	8054758	8124484
SELP	IL10	0.226436	undirected	7922200	7923907
NA	HIST1H2AB	0.226445	undirected	8117583	8124391
ELOVL7	HIST1H2BO	0.226447	undirected	8112274	8117614
HIST2H4A	DCAF12	0.226464	undirected	7905067	8160756
CTTN	ZNF385D	0.226468	undirected	7942204	8085774
NEXN	SH3BGRL2	0.226497	undirected	7902495	8120833
HIST1H2BI	GNG11	0.226518	undirected	8117429	8134257
MND1	HIST1H2AJ	0.226536	undirected	8097857	8124518
NA	CD69	0.226557	undirected	7925318	7961075
IL10	KIR3DX1	0.226565	undirected	7923907	8031200
ALOX12	MEIS1	0.226574	undirected	8004221	8042356
RNA5SP31	ELOVL2-AS1	0.226584	undirected	7969358	8116904
MPL	PROS1	0.226617	undirected	7900683	8089015
MMRN1	HIST1H2BH	0.226662	undirected	8096415	8117426
HIST2H2BE	EGF	0.226677	undirected	7919637	8096845
CMTM5	DUSP4	0.226678	undirected	7973403	8150076
HIST1H2BO	NFIB	0.226728	undirected	8117614	8160138
MMD	MPIG6B	0.226735	undirected	8016832	8118249
ITGA2B	HIST1H3H	0.226747	undirected	8016044	8117589
ZNF385D	PPBP	0.226787	undirected	8085774	8100971
PROS2P	VTRNA1-3	0.226796	undirected	8089011	8108631
SNHG12	SNHG1	0.226841	undirected	7914202	7948908
STRADB	ABLIM3	0.226849	undirected	8047443	8109093
DNM3	DDX11L16	0.226857	undirected	7907370	8054758
STRADB	ABLIM3	0.226875	undirected	7901336	8109093
GAS5	RPL23	0.226924	undirected	7922408	8014755
STRADB	CLEC1B	0.22694	undirected	7901336	7961102
DNM3	NA	0.226983	undirected	7907370	8117583
HIST2H4A	DCAF12	0.227027	undirected	7919627	8160756
SOCS3	MPIG6B	0.22703	undirected	8018864	8178074
SOCS3	MPIG6B	0.227037	undirected	8018864	8179313
RNU5E-1	EIF4A2	0.227055	undirected	7897801	8084708
SNHG12	FSTL1	0.227066	undirected	7914214	8089835
MFAP3L	ABLIM3	0.227088	undirected	8103695	8109093
NA	HIST1H2BB	0.227091	undirected	8117583	8124394
NA	NA	0.227119	undirected	7928907	8127423
HIST1H2BI	IGF2BP3	0.227139	undirected	8117429	8138566
MEIS1	TREML1	0.227143	undirected	8042356	8126269
SOCS3	PPBP	0.227163	undirected	8018864	8100971
RNU6-759P	PLK2	0.22721	undirected	8065990	8112202
HIST2H4A	MEIS1	0.227222	undirected	7905067	8042356
ELOVL7	HIST1H2AB	0.227242	undirected	8112274	8124391
NA	VTRNA1-3	0.2273	undirected	7926983	8108631
HSPA8	SNORA33	0.227304	undirected	7952335	8122144
HIST2H2BE	HIST1H2BM	0.227329	undirected	7919637	8117594
GNG11	MPIG6B	0.22737	undirected	8134257	8178074
RGS6	CAVIN2	0.227383	undirected	7975482	8057797
DNM3	ABLIM3	0.227388	undirected	7907370	8109093
HIST2H4A	MEIS1	0.227388	undirected	7919627	8042356
PDE5A	ELOVL2-AS1	0.227394	undirected	8102532	8116904
SELP	MMRN1	0.22741	undirected	7922200	8096415
EIF4A2	HIST1H2BI	0.227435	undirected	8084708	8117429
SNHG1	RNA5SP31	0.227441	undirected	7948902	7969358
NEXN	SNHG12	0.227452	undirected	7902495	7914214
PDE3A	RN7SL472P	0.227468	undirected	7954293	7981333
SH3BGRL2	HIST1H3F	0.227479	undirected	8120833	8124437
NA	MT-CO1	0.227483	undirected	8127423	8165663
RGS13	HIST1H2BI	0.227519	undirected	7908397	8117429
RGS13	ITGA2B	0.227536	undirected	7908397	8016044
EIF4A2	HIST1H2AE	0.227552	undirected	8084708	8117408
MT-CO1	NA	0.227556	undirected	7896750	8127423
TUBB1	PLOD2	0.227596	undirected	8063716	8091283
HIST2H2BE	HIST1H2BI	0.227608	undirected	7919637	8117429
SNHG12	EIF4A2	0.227637	undirected	7914202	8084708
HIST2H4A	CCDC175	0.227657	undirected	7905067	7979444
NUSAP1	HGD	0.227731	undirected	7982889	8089851
ALOX12	GNG11	0.227733	undirected	8004221	8134257
PLK2	MPIG6B	0.227739	undirected	8112202	8179313
RNVU1-15	SNHG1	0.22775	undirected	7919560	7948906
CAVIN2	DUSP4	0.227771	undirected	8057797	8150076
HIST2H2BE	HSPA8	0.227789	undirected	7919637	7952335
PROS1	MPIG6B	0.227791	undirected	8089015	8118249
PDE3A	HIST1H2AB	0.227835	undirected	7954293	8124391
RPL23	HIST1H3J	0.227858	undirected	8014755	8124537
SNHG1	HIST1H3A	0.22789	undirected	7948908	8117330
GAS5	RNA5SP31	0.227913	undirected	7922406	7969358
RNA5SP31	HIST1H2AK	0.227923	undirected	7969358	8124524
HIST2H4A	CCDC175	0.227962	undirected	7919627	7979444
SNORA37	PROS1	0.227978	undirected	8023392	8089015
HIST2H3PS2	HIST1H2AE	0.228042	undirected	7905085	8117408
MFAP3L	PKHD1L1	0.228049	undirected	8103695	8147891
NUSAP1	HIST1H2BH	0.228052	undirected	7982889	8117426
HIST2H3PS2	SELP	0.228065	undirected	7919614	7922200
RAB27B	PTGS1	0.228069	undirected	8021301	8157650
FSTL1	NA	0.228108	undirected	8089835	8117583
IFIT1B	HIST1H2BB	0.228112	undirected	7929061	8124394
ITGA2B	P2RY12	0.228134	undirected	8016044	8091530
NEXN	HIST1H3H	0.228184	undirected	7902495	8117589
ST5	CD14	0.228187	undirected	7946401	8114612
RNA5SP31	LINC00328-2P	0.228212	undirected	7969358	8155453
NEXN	PLOD2	0.228219	undirected	7902495	8091283
SLFN14	MPIG6B	0.228287	undirected	8014259	8179313
SNHG1	HIST1H2AM	0.228287	undirected	7948904	8124540
STRADB	TREML1	0.228311	undirected	7901336	8126269
HIST2H4A	SELP	0.228395	undirected	7919627	7922200
RNA5SP31	NA	0.228422	undirected	7969358	8117583
HIST2H4A	SELP	0.228442	undirected	7905067	7922200
RNVU1-15	PVALB	0.228461	undirected	7919556	8075838
GAS5	EIF4A2	0.228475	undirected	7922400	8084708
C15orf54	LTBP1	0.228483	undirected	7982593	8041383
RPL23	GP1BB	0.228492	undirected	8014755	8071268
RNVU1-15	SNHG5	0.228507	undirected	7919560	8127987
PROS1	IGF2BP3	0.228518	undirected	8089015	8138566
PPBP	HIST1H2BO	0.228527	undirected	8100971	8117614
RNA5SP31	HGD	0.228528	undirected	7969358	8093278
ELOVL2-AS1	HIST1H2BC	0.228537	undirected	8116904	8124406
HIST1H3H	HIST1H2AB	0.22856	undirected	8117589	8124391
AKAP6	PAQR8	0.2286	undirected	7973850	8120215
MMRN1	ABLIM3	0.228627	undirected	8096415	8109093
HIST2H3PS2	HIST1H3B	0.228661	undirected	7919614	8124388
NA	PTGS1	0.228686	undirected	8117583	8157650
STRADB	HIST1H2BG	0.2287	undirected	7901336	8124423
SPARC	HIST1H3F	0.2287	undirected	8115327	8124437
GYPA	DCAF12	0.2287	undirected	8102998	8160756
RPL23	SNORD101	0.228724	undirected	8014755	8122142
RNU6-379P	JMY	0.228756	undirected	8073332	8106516
GUCY1B1	HIST1H2BB	0.228789	undirected	8097973	8124394
HSPA8	HBA2	0.228792	undirected	7952335	7991762
SOCS3	MPIG6B	0.228805	undirected	8018864	8118249
EIF5	CCL4	0.228821	undirected	7977075	8006602
HIST1H2BG	DCAF12	0.228829	undirected	8124423	8160756
HSPA8	HBA2	0.228882	undirected	7952335	7991766
ZFAS1	HIST1H3A	0.228898	undirected	8063345	8117330
CMTM5	MFSD2B	0.228913	undirected	7973403	8040522
DDX11L16	GNG11	0.228928	undirected	8054758	8134257
LGALSL	TFPI	0.228931	undirected	8042283	8057599
SOCS1	LTBP1	0.228935	undirected	7999423	8041383
GAS5	RNU6-918P	0.228981	undirected	7922408	8156759
SNHG12	SNHG1	0.228988	undirected	7914212	7948906
SNHG12	SNHG12	0.229011	undirected	7914202	7914212
RGS6	HIST1H2BI	0.229025	undirected	7975482	8117429
MMRN1	HBEGF	0.229027	undirected	8096415	8114572
PLK2	SPARC	0.229048	undirected	8112202	8115327
PDE3A	MPIG6B	0.22909	undirected	7954293	8118249
EGF	HIST1H2AE	0.229108	undirected	8096845	8117408
RAB27B	MEIS1	0.229138	undirected	8021301	8042356
RNVU1-15	NA	0.229172	undirected	7919560	8117583
AREG	PAQR8	0.229182	undirected	8095744	8120215
ZFAS1	HIST1H2BH	0.229201	undirected	8063345	8117426
GP1BA	MIR516B2	0.229207	undirected	8004024	8031031
RNVU1-6	PPBP	0.229217	undirected	7904715	8100971
NEXN	VTRNA1-3	0.229224	undirected	7902495	8108631
RGS13	HIST1H3A	0.229228	undirected	7908397	8117330
SNHG1	HIST1H2BH	0.229237	undirected	7948900	8117426
PVALB	MMRN1	0.229241	undirected	8075838	8096415
AKAP6	ACKR3	0.229243	undirected	7973850	8049471
GP1BA	SOCS3	0.229249	undirected	8004024	8018864
SNHG12	GAS5	0.229289	undirected	7914212	7922406
PTCH2	HIST1H2BC	0.22929	undirected	7915612	8124406
HIST1H3A	HIST1H1B	0.229309	undirected	8117330	8124527
AKAP6	USP53	0.229316	undirected	7973850	8097098
RGS18	RHOBTB1	0.229317	undirected	7908376	7933821
HGD	HIST1H3A	0.22936	undirected	8093278	8117330
SOCS3	NFIB	0.229382	undirected	8018864	8160138
SNHG12	MMRN1	0.229431	undirected	7914202	8096415
RHOBTB1	LGALSL	0.229477	undirected	7933821	8042283
GAS5	ABCB4	0.229484	undirected	7922400	8140752
RPL23	SNHG5	0.229531	undirected	8014755	8127989
HIST1H2BI	HIST1H2AH	0.229551	undirected	8117429	8117543
NA	DCAF12	0.229603	undirected	7959572	8160756
AREG	TBRG4	0.229615	undirected	8095736	8139482
MPL	NA	0.229629	undirected	7900683	7926983
TREML1	NFIB	0.229634	undirected	8126269	8160138
PDE3A	HIST1H2BI	0.229652	undirected	7954293	8117429
NA	HIST1H2BG	0.229666	undirected	8003859	8124423
SNHG1	SNHG1	0.229677	undirected	7948900	7948908
PLOD2	MPIG6B	0.229692	undirected	8091283	8179313
MMRN1	GNG11	0.229698	undirected	8096415	8134257
HGD	HIST1H3A	0.229743	undirected	8089851	8117330
RGS13	RNVU1-15	0.229772	undirected	7908397	7919560
MPL	DENND2C	0.229817	undirected	7900683	7918768
STRADB	HIST1H2BI	0.229839	undirected	7901336	8117429
ENKUR	CAVIN2	0.229855	undirected	7932598	8057797
MEIS1	PROS2P	0.229879	undirected	8042356	8089011
NA	EIF4A2	0.229893	undirected	7922416	8084708
GAS5	HIST1H2BH	0.229965	undirected	7922406	8117426
CLU	MT-TQ	0.229992	undirected	8149927	8165694
HIST2H2BE	RGS6	0.230015	undirected	7919637	7975482
FSTL1	GAGE12J	0.230071	undirected	8089835	8167560
LTBP1	HIST1H2AI	0.23008	undirected	8041383	8117580
HIST1H2BH	HIST1H3H	0.230101	undirected	8117426	8117589
SNHG1	RNA5SP31	0.230127	undirected	7948904	7969358
RNVU1-6	IL10	0.23015	undirected	7904715	7923907
SNORA80E	HIST1H2BI	0.230162	undirected	7920873	8117429
MT-TQ	CLU	0.230179	undirected	7911335	8149927
SNHG1	SNHG5	0.230179	undirected	7948910	8127989
HIST1H3H	MYCT1	0.230181	undirected	8117589	8122860
MMRN1	HIST1H2BB	0.230183	undirected	8096415	8124394
GP1BA	DUSP4	0.230192	undirected	8004024	8150076
BCL3	FOSL2	0.230192	undirected	8029465	8041048
RNVU1-15	NA	0.230208	undirected	7919556	7959572
MPL	RNU6-759P	0.230209	undirected	7900683	8065990
NA	CCDC175	0.230255	undirected	7926983	7979444
HIST2H3PS2	SELP	0.230271	undirected	7905085	7922200
GAS5	EIF5	0.230317	undirected	7922408	7977075
RN7SL472P	SNORA37	0.230322	undirected	7981333	8023392
RPL23	HIST1H2AJ	0.230328	undirected	8014755	8124518
GAS5	HIST1H3A	0.230346	undirected	7922406	8117330
DUSP5	NR4A2	0.230346	undirected	7930413	8055952
SELP	HSPA2	0.230388	undirected	7922200	7975076
FSTL1	PDE5A	0.230405	undirected	8089835	8102532
RNVU1-6	CLC	0.230427	undirected	7904715	8036755
RGS6	TFPI	0.230434	undirected	7975482	8057599
DNM3	EGF	0.230448	undirected	7907370	8096845
GAS5	NA	0.230451	undirected	7922400	8117583
ALOX12	CAVIN2	0.230455	undirected	8004221	8057797
THBS1	TIPARP	0.23049	undirected	7982597	8083569
STRADB	HIST1H2AE	0.230503	undirected	7901336	8117408
HIST1H2AL	HIST1H2BO	0.230517	undirected	8117608	8117614
RNA5SP31	HGD	0.230524	undirected	7969358	8089851
HIST2H2BE	HIST1H3J	0.230572	undirected	7919637	8124537
HSPA2	MEIS1	0.230585	undirected	7975076	8042356
RGS18	FSTL1	0.230593	undirected	7908376	8089835
RN7SL472P	CAVIN2	0.230605	undirected	7981333	8057797
STRADB	CLU	0.230624	undirected	8047443	8149927
HSPA8	PROS2P	0.230646	undirected	7952335	8089011
SNHG1	HIST1H2AJ	0.230657	undirected	7948904	8124518
PKHD1L1	RNU6-918P	0.230681	undirected	8147891	8156759
RAB27B	FAXDC2	0.230686	undirected	8021301	8115397
HSPA8	DUSP4	0.230729	undirected	7952335	8150076
LINC00328-2P	LINC00328-2P	0.230752	undirected	8155453	8161375
GP1BA	RAB27B	0.230793	undirected	8004024	8021301
ITGA2B	HIST1H2AL	0.230795	undirected	8016044	8117608
CCL4	HIST1H3A	0.230799	undirected	8006602	8117330
ZFAS1	HIST1H2BI	0.230865	undirected	8063345	8117429
HSPA8	PLOD2	0.230883	undirected	7952335	8091283
NA	PLK2	0.230884	undirected	7926983	8112202
GAS5	RNA5SP31	0.230892	undirected	7922400	7969358
MEIS1	HIST1H2BI	0.230948	undirected	8042356	8117429
HIST2H3PS2	HIST1H2BN	0.230966	undirected	7919612	8117600
RPL23	VTRNA1-3	0.230993	undirected	8014755	8108631
HGD	NA	0.231005	undirected	8093278	8117583
ABLIM3	BEND2	0.231012	undirected	8109093	8171545
RNVU1-15	SNHG1	0.231013	undirected	7919556	7948904
HGD	NA	0.231035	undirected	8089851	8117583
RNVU1-6	NFIB	0.231059	undirected	7904715	8160138
ELL2	F5	0.231098	undirected	7921344	7922174
CMTM5	PPBP	0.231125	undirected	7973403	8100971
NRGN	HIST1H2BJ	0.231142	undirected	7944876	8124484
MND1	HIST1H2BI	0.231144	undirected	8097857	8117429
BMP6	LY6G6F	0.231147	undirected	8116818	8178063
SPARC	MT-ND1	0.231162	undirected	8115327	8165656
HIST1H2AE	LINC00328-2P	0.231168	undirected	8117408	8155453
PER1	FOSL2	0.231173	undirected	8012349	8041048
EIF4A2	SNORA33	0.231176	undirected	8084708	8122144
MT-CO1	MT-CO1	0.231181	undirected	8113356	8165663
CMTM5	HIST1H2BO	0.231199	undirected	7973403	8117614
HIST2H3PS2	HIST1H3B	0.231221	undirected	7905085	8124388
DNM3	PKHD1L1	0.231235	undirected	7907370	8147891
OR2T8	MTND4P12	0.231241	undirected	7911233	8114211
CLEC1B	MYCT1	0.231262	undirected	7961102	8122860
HSPA2	DCAF12	0.231301	undirected	7975076	8160756
ITGA2B	ZMAT1	0.231317	undirected	8016044	8174119
BMP6	LY6G6F	0.231323	undirected	8116818	8118235
CCDC175	PROS1	0.23133	undirected	7979444	8089015
SOCS3	FAXDC2	0.231331	undirected	8018864	8115397
HIST2H2BE	GP1BA	0.231338	undirected	7919637	8004024
SNORA2A	LINC00328-2P	0.231353	undirected	7962827	8161375
HSPA8	ZNF385D	0.231353	undirected	7952335	8085774
NEXN	CAVIN2	0.231373	undirected	7902495	8057797
GAS5	RNU6-759P	0.23142	undirected	7922412	8065990
GP1BB	EGF	0.231441	undirected	8071268	8096845
CCDC175	TREML1	0.231464	undirected	7979444	8126269
PDE3A	PRKAR2B	0.231478	undirected	7954293	8135378
RN7SL472P	MMRN1	0.231492	undirected	7981333	8096415
HSPA2	RPL23	0.231505	undirected	7975076	8014755
IL10	SOCS1	0.231558	undirected	7923907	7999423
NEXN	RGS6	0.231637	undirected	7902495	7975482
RHOBTB1	MPIG6B	0.231658	undirected	7933821	8178074
HIST2H3PS2	HIST1H2BH	0.231673	undirected	7919614	8117426
LTBP1	HIST1H3B	0.231673	undirected	8041383	8124388
RNU1-120P	MT-ND2	0.231676	undirected	7904953	8165658
USP46	HIST1H3A	0.231687	undirected	8100328	8117330
PROS2P	PF4	0.231694	undirected	8089011	8100966
NA	SNHG1	0.23171	undirected	7926983	7948904
DUSP5	SOCS3	0.231735	undirected	7930413	8018864
GAS5	GAS5	0.231735	undirected	7922400	7922408
DENND2C	CTTN	0.231738	undirected	7918768	7942204
HSPA8	NA	0.231756	undirected	7952335	8117583
HIST2H2BE	SNCA	0.231852	undirected	7919637	8101762
PVALB	DUSP4	0.231868	undirected	8075838	8150076
THBS1	OLFM2	0.231927	undirected	7982597	8033818
HGD	HIST1H2BH	0.231941	undirected	8093278	8117426
HGD	HIST1H2BH	0.231987	undirected	8089851	8117426
ASAP2	PDE5A	0.231988	undirected	8040113	8102532
HSPA2	PLOD2	0.231992	undirected	7975076	8091283
SELP	ENKUR	0.231993	undirected	7922200	7932598
HSPA8	HIST1H2AM	0.232	undirected	7952335	8124540
PLK2	HIST1H2BI	0.232032	undirected	8112202	8117429
DAB2	LY6G6F	0.232056	undirected	8111772	8178063
CMTM5	RPL23	0.232072	undirected	7973403	8014755
SOCS3	GP1BB	0.23209	undirected	8018864	8071268
ITGA2B	BEND2	0.232109	undirected	8016044	8171545
NRGN	BMP6	0.232117	undirected	7944876	8116818
LTBP1	HIST1H1B	0.232139	undirected	8041383	8124527
PLOD2	PTGS1	0.232153	undirected	8091283	8157650
HIST1H2BO	PKHD1L1	0.232155	undirected	8117614	8147891
EIF5	SNORA33	0.232167	undirected	7977075	8122144
HIST2H2BB	HIST1H2BO	0.232169	undirected	7919606	8117614
PROS2P	ABLIM3	0.232179	undirected	8089011	8109093
PDE3A	HBA2	0.232195	undirected	7954293	7991762
ITGA2B	NA	0.232205	undirected	8016044	8117583
C15orf54	SPARC	0.232208	undirected	7982593	8115327
ASAP2	PLOD2	0.232244	undirected	8040113	8091283
PDE3A	HBA2	0.232294	undirected	7954293	7991766
OR2T8	SH3BGRL2	0.232311	undirected	7911233	8120833
SH3BGRL2	HIST1H2BG	0.232336	undirected	8120833	8124423
RNVU1-6	LTBP1	0.232353	undirected	7904715	8041383
RAB27B	PKHD1L1	0.232359	undirected	8021301	8147891
STRADB	PROS2P	0.232395	undirected	7901336	8089011
PROS2P	DUSP4	0.232456	undirected	8089011	8150076
CTTN	HIST1H2AB	0.232487	undirected	7942204	8124391
DAB2	LY6G6F	0.232539	undirected	8111772	8118235
AREG	TBRG4	0.232544	undirected	8095744	8139482
SNORA37	LY6G6F	0.232555	undirected	8023392	8118235
SNHG1	SNHG1	0.232573	undirected	7948902	7948908
LTBP1	DDX11L16	0.232577	undirected	8041383	8054758
SNORA37	ELOVL7	0.23262	undirected	8023392	8112274
NA	CKS2	0.232646	undirected	7922416	8156290
ANKRD36C	HIST1H3A	0.232647	undirected	8053797	8117330
HIST1H3A	NA	0.232668	undirected	8117330	8127423
NRGN	PF4	0.232698	undirected	7944876	8100966
HBB	IGF2BP3	0.232712	undirected	7946033	8138566
RNVU1-15	GNG11	0.232742	undirected	7919560	8134257
RNVU1-15	HIST1H2AB	0.232744	undirected	7919560	8124391
HIST2H2BE	SLC14A1	0.232763	undirected	7919637	8021081
STRADB	BMP6	0.232782	undirected	8047443	8116818
USP46	PKHD1L1	0.232782	undirected	8100328	8147891
SNORA37	GP1BB	0.232788	undirected	8023392	8071268
SNORA37	LY6G6F	0.232829	undirected	8023392	8178063
HIST2H3PS2	HIST1H2BH	0.232857	undirected	7905085	8117426
HBA2	IGF2BP3	0.232932	undirected	7991762	8138566
HIST1H2BI	HIST1H2AB	0.232949	undirected	8117429	8124391
RPL23	HIST1H2BN	0.232955	undirected	8014755	8117600
HSPA2	HBA2	0.232965	undirected	7975076	7991766
RHOBTB1	GP1BA	0.233025	undirected	7933821	8004024
HSPA2	HBA2	0.233026	undirected	7975076	7991762
SNHG1	ABCB4	0.233035	undirected	7948906	8140752
HBA2	IGF2BP3	0.23306	undirected	7991766	8138566
MEIS1	PPBP	0.233109	undirected	8042356	8100971
TNFAIP3	TBRG4	0.233126	undirected	8122265	8139482
NA	CTLA4	0.23313	undirected	7922416	8047692
HIST1H2BO	HIST1H2AB	0.233142	undirected	8117614	8124391
SNORA37	SPARC	0.233146	undirected	8023392	8115327
HIST1H2AE	MT-ND4	0.23316	undirected	8117408	8165680
HIST1H2AH	SNORA33	0.233171	undirected	8117543	8122144
HIST2H3PS2	HIST1H3F	0.233174	undirected	7919614	8124437
RGS13	HIST2H3PS2	0.233205	undirected	7908397	7919612
LTBP1	ELOVL2-AS1	0.233262	undirected	8041383	8116904
ALOX12	VTRNA1-3	0.233268	undirected	8004221	8108631
HIST2H4A	HIST1H3J	0.233277	undirected	7919627	8124537
SELP	ZNF385D	0.233287	undirected	7922200	8085774
MMD	RAB27B	0.2333	undirected	8016832	8021301
USP53	CD14	0.233312	undirected	8097098	8114612
SNHG12	RNY3P2	0.233359	undirected	7914212	7969091
HIST1H2AE	HIST1H2BM	0.233362	undirected	8117408	8117594
SH3BGRL2	HIST1H2AB	0.23339	undirected	8120833	8124391
HIST2H4A	HIST1H3J	0.233405	undirected	7905067	8124537
NA	HIST1H2AJ	0.233406	undirected	7922416	8124518
CTTN	HIST1H2BB	0.233414	undirected	7942204	8124394
RN7SL472P	GUCY1B1	0.233439	undirected	7981333	8097973
RN7SL472P	SH3BGRL2	0.233476	undirected	7981333	8120833
NA	HIST1H2BO	0.233542	undirected	8117583	8117614
LGALSL	PROS2P	0.233566	undirected	8042283	8089011
HGD	MTND4P12	0.233624	undirected	8093278	8114211
PDE3A	MPIG6B	0.233668	undirected	7954293	8179313
LTBP1	MT-TQ	0.23368	undirected	8041383	8165694
PER1	SMAD1	0.233688	undirected	8012349	8097657
CCL4	HIST1H2BI	0.233699	undirected	8006602	8117429
DENND2C	MFAP3L	0.233722	undirected	7918768	8103695
PER1	SMC4	0.233761	undirected	8012349	8083737
[truncated: 2,999 more rows]
