# Supplementary material for: Multiple Processes May Involve in the IgG4-RD Pathogenesis: An Integrative Study via Proteomic and Transcriptomic Analysis
Source: Front Immunol. 2020 Aug 20;11:1795. doi: 10.3389/fimmu.2020.01795 (PMC7468437; doi:10.3389/fimmu.2020.01795)
Supplement: Table S8 — KEGG analysis with genes (adjacency value > 0.2) in yellow module in PBMC transcriptomic data. [file Table_8.XLSX]

## Sheet: Sheet1
Associated Genes Found	CEREBRAL_LOCALIZATION_INFO	CEREBRAL_LOCALIZATION_INFO_ALL	GOGroups	GOID	GOTerm	Group PValue	Group PValue Corrected with None	name	Nr. Genes	Ontology Source	OverViewTerm	shared name	Term PValue	Term PValue Corrected with None	UniProtKB_AC	UNIQUE_ID
[HIST1H2AB, HIST1H2AE, HIST1H2AH, HIST1H2AI, HIST1H2AJ, HIST1H2AK, HIST1H2AL, HIST1H2AM, TNFAIP3]			[Group0]	KEGG:04217	Necroptosis	{Group0=8.744983792706553E-4}	{}	Necroptosis	9	KEGG_04.09.2018	TRUE	Necroptosis	0.000874498	0.000874498		KEGG:04217
	1.Extracellular	1.Extracellular, 3.Intra Cellular, 5.Nucleus	KEGG:05322	HIST1H2AE	HIST1H2AE			3012			ASSOCIATED_GENE	3012			[P04908, Q08AJ9]	3012
	1.Extracellular	1.Extracellular, 3.Intra Cellular	KEGG:04217	TNFAIP3	TNFAIP3			7128			ASSOCIATED_GENE	7128			[P21580]	7128
	1.Extracellular	1.Extracellular, 3.Intra Cellular, 5.Nucleus	KEGG:05322	HIST1H2AI	HIST1H2AI			8329			ASSOCIATED_GENE	8329			[A4FTV9, P0C0S8]	8329
	1.Extracellular	1.Extracellular, 3.Intra Cellular, 5.Nucleus	KEGG:05322	HIST1H2AK	HIST1H2AK			8330			ASSOCIATED_GENE	8330			[A4FTV9, P0C0S8]	8330
	1.Extracellular	1.Extracellular, 3.Intra Cellular, 5.Nucleus	KEGG:05322	HIST1H2AJ	HIST1H2AJ			8331			ASSOCIATED_GENE	8331			[Q99878]	8331
	1.Extracellular	1.Extracellular, 3.Intra Cellular, 5.Nucleus	KEGG:05322	HIST1H2AL	HIST1H2AL			8332			ASSOCIATED_GENE	8332			[A4FTV9, P0C0S8]	8332
	1.Extracellular	1.Extracellular, 3.Intra Cellular, 5.Nucleus	KEGG:05322	HIST1H2AB	HIST1H2AB			8335			ASSOCIATED_GENE	8335			[P04908, Q08AJ9]	8335
	1.Extracellular	1.Extracellular, 3.Intra Cellular, 5.Nucleus	KEGG:05322	HIST1H2AM	HIST1H2AM			8336			ASSOCIATED_GENE	8336			[A4FTV9, P0C0S8]	8336
	1.Extracellular	1.Extracellular, 3.Intra Cellular, 5.Nucleus	KEGG:05322	HIST1H2AH	HIST1H2AH			85235			ASSOCIATED_GENE	85235			[A3KPC7, Q96KK5]	85235
[BMP6, LTBP1, SMAD1, THBS1]			[Group1]	KEGG:04350	TGF-beta signaling pathway	{Group1=0.04091573915189048}	{}	TGF-beta%20signaling%20pathway	4	KEGG_04.09.2018	TRUE	TGF-beta%20signaling%20pathway	0.0409157	0.0409157		KEGG:04350
	1.Extracellular	1.Extracellular, 3.Intra Cellular	KEGG:04350	LTBP1	LTBP1			4052			ASSOCIATED_GENE	4052			[B7ZLY3, Q14766]	4052
	2.Plasma Membrane	2.Plasma Membrane, 3.Intra Cellular, 4.Nuclear Membrane, 5.Nucleus	KEGG:05202	SMAD1	SMAD1			4086			ASSOCIATED_GENE	4086			[Q15797]	4086
	1.Extracellular	1.Extracellular, 3.Intra Cellular	KEGG:04350	BMP6	BMP6			654			ASSOCIATED_GENE	654			[B4DUF7, P22004, Q4VBA3]	654
	1.Extracellular	1.Extracellular, 2.Plasma Membrane, 3.Intra Cellular	KEGG:05219	THBS1	THBS1			7057			ASSOCIATED_GENE	7057			[P07996]	7057
[GP1BA, GP1BB, ITGA2B, THBS1]			[Group7]	KEGG:04512	ECM-receptor interaction	{Group7=0.03938121462575816}	{}	ECM-receptor%20interaction	4	KEGG_04.09.2018	FALSE	ECM-receptor%20interaction	0.0379603	0.0379603		KEGG:04512
	1.Extracellular	1.Extracellular, 2.Plasma Membrane, 3.Intra Cellular	KEGG:04640	GP1BA	GP1BA			2811			ASSOCIATED_GENE	2811			[L7UYB8, P07359]	2811
	2.Plasma Membrane	2.Plasma Membrane	KEGG:04640	GP1BB	GP1BB			2812			ASSOCIATED_GENE	2812			[P13224]	2812
	1.Extracellular	1.Extracellular, 2.Plasma Membrane, 3.Intra Cellular	KEGG:04640	ITGA2B	ITGA2B			3674			ASSOCIATED_GENE	3674			[P08514]	3674
[CLU, F5, PLAUR, PROS1, TFPI]			[Group3]	KEGG:04610	Complement and coagulation cascades	{Group3=0.007407639851181805}	{}	Complement%20and%20coagulation%20cascades	5	KEGG_04.09.2018	TRUE	Complement%20and%20coagulation%20cascades	0.00740764	0.00740764		KEGG:04610
	1.Extracellular	1.Extracellular, 2.Plasma Membrane, 3.Intra Cellular	KEGG:04610	CLU	CLU			1191			ASSOCIATED_GENE	1191			[P10909]	1191
	1.Extracellular	1.Extracellular, 2.Plasma Membrane, 3.Intra Cellular	KEGG:04610	F5	F5			2153			ASSOCIATED_GENE	2153			[P12259]	2153
	1.Extracellular	1.Extracellular, 2.Plasma Membrane, 3.Intra Cellular	KEGG:04610	PLAUR	PLAUR			5329			ASSOCIATED_GENE	5329			[M0R1I2, Q03405]	5329
	1.Extracellular	1.Extracellular, 2.Plasma Membrane, 3.Intra Cellular	KEGG:04610	PROS1	PROS1			5627			ASSOCIATED_GENE	5627			[A0A0S2Z4K3, A0A0S2Z4L3, P07225]	5627
	1.Extracellular	1.Extracellular, 2.Plasma Membrane, 3.Intra Cellular	KEGG:04610	TFPI	TFPI			7035			ASSOCIATED_GENE	7035			[P10646]	7035
[GP1BA, GP1BB, GUCY1B1, ITGA2B, P2RY12, PTGS1]			[Group7]	KEGG:04611	Platelet activation	{Group7=0.03938121462575816}	{}	Platelet%20activation	6	KEGG_04.09.2018	TRUE	Platelet%20activation	0.01187	0.01187		KEGG:04611
	2.Plasma Membrane	2.Plasma Membrane, 3.Intra Cellular	KEGG:04611	GUCY1B1	GUCY1B1			2983			ASSOCIATED_GENE	2983			[B7Z685, B7Z6G8, B7Z9H9, D6RC99, E9PCN2, Q02153]	2983
	1.Extracellular	1.Extracellular, 2.Plasma Membrane, 3.Intra Cellular	KEGG:04611	PTGS1	PTGS1			5742			ASSOCIATED_GENE	5742			[A0A087X296, P23219]	5742
	2.Plasma Membrane	2.Plasma Membrane, 3.Intra Cellular	KEGG:04611	P2RY12	P2RY12			64805			ASSOCIATED_GENE	64805			[A8K7T1, Q9H244]	64805
[CD14, GP1BA, GP1BB, GYPA, ITGA2B]			[Group7]	KEGG:04640	Hematopoietic cell lineage	{Group7=0.03938121462575816}	{}	Hematopoietic%20cell%20lineage	5	KEGG_04.09.2018	FALSE	Hematopoietic%20cell%20lineage	0.0170267	0.0170267		KEGG:04640
	2.Plasma Membrane	2.Plasma Membrane, 3.Intra Cellular, 5.Nucleus	KEGG:05144	GYPA	GYPA			2993			ASSOCIATED_GENE	2993			[A0A0C4DFT7, A0A2R8Y7F9, E9PD10, P02724, Q14419]	2993
	1.Extracellular	1.Extracellular, 2.Plasma Membrane, 3.Intra Cellular	KEGG:05202	CD14	CD14			929			ASSOCIATED_GENE	929			[P08571]	929
[GNG11, HIST1H2AB, HIST1H2AE, HIST1H2AH, HIST1H2AI, HIST1H2AJ, HIST1H2AK, HIST1H2AL, HIST1H2AM, HIST1H2BB, HIST1H2BC, HIST1H2BG, HIST1H2BH, HIST1H2BI, HIST1H2BJ, HIST1H2BM, HIST1H2BN, HIST1H2BO, HIST1H3A, HIST1H3B, HIST1H3F, HIST1H3H, HIST1H3J, HIST1H4D, HIST2H2BE, HIST2H4A]			[Group6]	KEGG:05034	Alcoholism	{Group6=6.072163572501191E-12}	{}	Alcoholism	26	KEGG_04.09.2018	FALSE	Alcoholism	1.12385e-18	1.12385e-18		KEGG:05034
	2.Plasma Membrane	2.Plasma Membrane, 3.Intra Cellular	KEGG:05034	GNG11	GNG11			2791			ASSOCIATED_GENE	2791			[P61952, Q53Y01]	2791
	3.Intra Cellular	3.Intra Cellular, 5.Nucleus	KEGG:05322	HIST1H2BB	HIST1H2BB			3018			ASSOCIATED_GENE	3018			[P33778]	3018
	1.Extracellular	1.Extracellular, 3.Intra Cellular, 5.Nucleus	KEGG:05322	HIST1H2BG	HIST1H2BG			8339			ASSOCIATED_GENE	8339			[B2R4S9, P62807]	8339
	1.Extracellular	1.Extracellular, 3.Intra Cellular, 5.Nucleus	KEGG:05322	HIST1H2BN	HIST1H2BN			8341			ASSOCIATED_GENE	8341			[A0A024RCJ9, Q99877]	8341
	1.Extracellular	1.Extracellular, 3.Intra Cellular, 5.Nucleus	KEGG:05322	HIST1H2BM	HIST1H2BM			8342			ASSOCIATED_GENE	8342			[Q99879]	8342
	1.Extracellular	1.Extracellular, 3.Intra Cellular, 5.Nucleus	KEGG:05322	HIST1H2BH	HIST1H2BH			8345			ASSOCIATED_GENE	8345			[Q93079]	8345
	1.Extracellular	1.Extracellular, 3.Intra Cellular, 5.Nucleus	KEGG:05322	HIST1H2BI	HIST1H2BI			8346			ASSOCIATED_GENE	8346			[B2R4S9, P62807]	8346
	1.Extracellular	1.Extracellular, 3.Intra Cellular, 5.Nucleus	KEGG:05322	HIST1H2BC	HIST1H2BC			8347			ASSOCIATED_GENE	8347			[B2R4S9, P62807]	8347
	3.Intra Cellular	3.Intra Cellular, 5.Nucleus	KEGG:05322	HIST1H2BO	HIST1H2BO			8348			ASSOCIATED_GENE	8348			[P23527]	8348
	1.Extracellular	1.Extracellular, 3.Intra Cellular, 5.Nucleus	KEGG:05322	HIST2H2BE	HIST2H2BE			8349			ASSOCIATED_GENE	8349			[Q16778]	8349
	1.Extracellular	1.Extracellular, 3.Intra Cellular, 5.Nucleus	KEGG:05322	HIST1H3A	HIST1H3A			8350			ASSOCIATED_GENE	8350			[P68431]	8350
	1.Extracellular	1.Extracellular, 3.Intra Cellular, 5.Nucleus	KEGG:05322	HIST1H3J	HIST1H3J			8356			ASSOCIATED_GENE	8356			[P68431]	8356
	1.Extracellular	1.Extracellular, 3.Intra Cellular, 5.Nucleus	KEGG:05322	HIST1H3H	HIST1H3H			8357			ASSOCIATED_GENE	8357			[P68431]	8357
	1.Extracellular	1.Extracellular, 3.Intra Cellular, 5.Nucleus	KEGG:05322	HIST1H3B	HIST1H3B			8358			ASSOCIATED_GENE	8358			[P68431]	8358
	1.Extracellular	1.Extracellular, 3.Intra Cellular, 5.Nucleus	KEGG:05322	HIST1H4D	HIST1H4D			8360			ASSOCIATED_GENE	8360			[B2R4R0, P62805]	8360
	1.Extracellular	1.Extracellular, 3.Intra Cellular, 5.Nucleus	KEGG:05322	HIST2H4A	HIST2H4A			8370			ASSOCIATED_GENE	8370			[B2R4R0, P62805]	8370
	1.Extracellular	1.Extracellular, 3.Intra Cellular, 5.Nucleus	KEGG:05322	HIST1H3F	HIST1H3F			8968			ASSOCIATED_GENE	8968			[P68431]	8968
	1.Extracellular	1.Extracellular, 2.Plasma Membrane, 3.Intra Cellular, 5.Nucleus	KEGG:05322	HIST1H2BJ	HIST1H2BJ			8970			ASSOCIATED_GENE	8970			[A0A024RCJ2, P06899]	8970
[HBA2, HBB, IL10]			[Group5]	KEGG:05143	African trypanosomiasis	{Group5=6.562732362145479E-4}	{}	African%20trypanosomiasis	3	KEGG_04.09.2018	FALSE	African%20trypanosomiasis	0.016526	0.016526		KEGG:05143
	1.Extracellular	1.Extracellular, 3.Intra Cellular	KEGG:05144	HBA2	HBA2			3040			ASSOCIATED_GENE	3040			[D1MGQ2, P69905]	3040
	1.Extracellular	1.Extracellular, 3.Intra Cellular	KEGG:05144	HBB	HBB			3043			ASSOCIATED_GENE	3043			[D9YZU5, P68871]	3043
	1.Extracellular	1.Extracellular, 3.Intra Cellular, 5.Nucleus	KEGG:05322	IL10	IL10			3586			ASSOCIATED_GENE	3586			[P22301, Q6FGW4]	3586
[GYPA, HBA2, HBB, IL10, SELP, THBS1]			[Group5]	KEGG:05144	Malaria	{Group5=6.562732362145479E-4}	{}	Malaria	6	KEGG_04.09.2018	TRUE	Malaria	9.84164e-05	9.84164e-05		KEGG:05144
	1.Extracellular	1.Extracellular, 2.Plasma Membrane, 3.Intra Cellular	KEGG:05144	SELP	SELP			6403			ASSOCIATED_GENE	6403			[A0A024R8Y9, P16109, Q5R341, Q6NUL9]	6403
[CD14, HIST1H3A, HIST1H3B, HIST1H3F, HIST1H3H, HIST1H3J, MEIS1, SMAD1]			[Group4]	KEGG:05202	Transcriptional misregulation in cancer	{Group4=0.008058452389339813}	{}	Transcriptional%20misregulation%20in%20cancer	8	KEGG_04.09.2018	TRUE	Transcriptional%20misregulation%20in%20cancer	0.00805845	0.00805845		KEGG:05202
	3.Intra Cellular	3.Intra Cellular	KEGG:05202	MEIS1	MEIS1			4211			ASSOCIATED_GENE	4211			[O00470]	4211
[HIST1H2BB, HIST1H2BC, HIST1H2BG, HIST1H2BH, HIST1H2BI, HIST1H2BJ, HIST1H2BM, HIST1H2BN, HIST1H2BO, HIST1H4D, HIST2H2BE, HIST2H4A]			[Group6]	KEGG:05203	Viral carcinogenesis	{Group6=6.072163572501191E-12}	{}	Viral%20carcinogenesis	12	KEGG_04.09.2018	FALSE	Viral%20carcinogenesis	5.9592e-05	5.9592e-05		KEGG:05203
[EGF, HBEGF, THBS1]			[Group2]	KEGG:05219	Bladder cancer	{Group2=0.025180871800215693}	{}	Bladder%20cancer	3	KEGG_04.09.2018	TRUE	Bladder%20cancer	0.0251809	0.0251809		KEGG:05219
	1.Extracellular	1.Extracellular, 2.Plasma Membrane, 3.Intra Cellular	KEGG:05219	HBEGF	HBEGF			1839			ASSOCIATED_GENE	1839			[Q99075]	1839
	1.Extracellular	1.Extracellular, 2.Plasma Membrane, 3.Intra Cellular	KEGG:05219	EGF	EGF			1950			ASSOCIATED_GENE	1950			[P01133]	1950
[HIST1H2AB, HIST1H2AE, HIST1H2AH, HIST1H2AI, HIST1H2AJ, HIST1H2AK, HIST1H2AL, HIST1H2AM, HIST1H2BB, HIST1H2BC, HIST1H2BG, HIST1H2BH, HIST1H2BI, HIST1H2BJ, HIST1H2BM, HIST1H2BN, HIST1H2BO, HIST1H3A, HIST1H3B, HIST1H3F, HIST1H3H, HIST1H3J, HIST1H4D, HIST2H2BE, HIST2H4A, IL10]			[Group6]	KEGG:05322	Systemic lupus erythematosus	{Group6=6.072163572501191E-12}	{}	Systemic%20lupus%20erythematosus	26	KEGG_04.09.2018	TRUE	Systemic%20lupus%20erythematosus	3.6539e-22	3.6539e-22		KEGG:05322
